# Supplementary material
Source: publisher figshare collection journal article supplement (https://geolsoc.figshare.com/ndownloader/files/24182624)
Supplement: Supplementary file 1 [file 24182624]

## Sheet: Hornblende 2-7-20
Label	SiO2	TiO2	Al2O3	FeO	MnO	MgO	CaO	Na2O	K2O	Total	Na	Mg	Al	Si	K	Ca	Ti	Mn	Fe
BH-18-02-Grain1-2	46.1889	0.3755	9.6929	15.0861	0.4102	12.2587	12.257	1.0276	1.028	2.0556	0.2936	2.6922	1.6832	6.8056	0.1932	1.935	0.0416	0.0512	1.8589
BH-18-02-Grain1-3	48.9435	0.2191	7.133	13.0772	0.4737	14.3767	12.1835	0.9358	0.5921	1.5279	0.2642	3.1207	1.2243	7.1278	0.11	1.901	0.024	0.0584	1.5927
BH-18-02-Grain2-1	44.7309	0.5507	11.0514	15.0796	0.2747	11.5598	12.044	1.2606	1.0669	2.3275	0.3634	2.5615	1.9364	6.65	0.2023	1.9184	0.0616	0.0346	1.8748
BH-18-02-Grain2-2	44.3911	0.5579	10.7013	15.8066	0.3605	11.7158	12.1922	1.3007	1.1333	2.434	0.3752	2.5984	1.8767	6.6053	0.2151	1.9437	0.0624	0.0454	1.9669
BH-18-02-Grain2-3	44.6932	0.6393	11.2893	15.1869	0.4673	11.5981	12.3994	1.2115	1.2563	2.4678	0.3464	2.5496	1.9623	6.5915	0.2364	1.9593	0.0709	0.0584	1.8731
BH-18-02-Grain3-1	42.6611	0.6293	13.002	16.1565	0.323	10.484	11.2579	1.6517	1.4158	3.0675	0.4807	2.3455	2.3001	6.4034	0.2711	1.8105	0.071	0.0411	2.0281
BH-18-02-Grain3-2	43.4697	0.6837	12.9274	15.6549	0.5075	10.6432	11.1824	1.4877	1.5084	2.9961	0.4291	2.3602	2.2668	6.4673	0.2863	1.7825	0.0765	0.064	1.9478
BH-18-02-Grain3-3	42.8258	0.6766	13.0984	15.4781	0.3358	10.6063	11.2624	1.6754	1.5483	3.2237	0.4866	2.3681	2.3125	6.4152	0.2959	1.8076	0.0762	0.0426	1.939
BH-18-02-Grain4-1	50.74	0.1644	5.1754	12.0879	0.3099	15.1528	12.7727	0.6549	0.4157	1.0706	0.1843	3.2791	0.8856	7.3667	0.077	1.9869	0.018	0.0381	1.4677
BH-18-02-Grain4-2	54.4109	0.0546	2.5898	10.52	0.3648	16.8846	12.9577	0.2729	0.1633	0.4362	0.0751	3.5729	0.4333	7.7246	0.0296	1.971	0.0058	0.0439	1.249
BH-18-02-Grain4-3	53.9147	0.0773	2.9965	11.0049	0.3812	16.7319	12.6723	0.3395	0.1633	0.5028	0.0936	3.5469	0.5023	7.6679	0.0296	1.931	0.0083	0.0459	1.3089
BH-18-02-Grain5-1	48.6048	0.255	7.7647	13.7416	0.3869	13.7295	11.9587	0.9781	0.4847	1.4628	0.2766	2.9851	1.3349	7.09	0.0902	1.869	0.028	0.0478	1.6763
BH-18-02-Grain5-2	49.5507	0.1942	7.4182	13.6568	0.3789	14.26	12.1446	0.9964	0.519	1.5154	0.278	3.0589	1.2583	7.1312	0.0953	1.8726	0.021	0.0462	1.6437
BH-18-02-Grain5-3	50.1416	0.2159	6.6198	13.1783	0.2679	14.8186	12.0463	0.8529	0.5386	1.3915	0.2381	3.1806	1.1235	7.2204	0.0989	1.8586	0.0234	0.0327	1.587
BH-18-02-Grain6-1	42.3228	0.5092	11.859	15.8047	0.3602	10.8568	11.9777	1.2373	1.3308	2.5681	0.3655	2.4654	2.1294	6.4481	0.2586	1.9552	0.0583	0.0465	2.0137
BH-18-02-Grain6-2	43.6497	0.6307	12.0289	15.7011	0.3892	11.5566	11.8912	1.3611	1.3071	2.6682	0.3914	2.5545	2.1024	6.4732	0.2473	1.8894	0.0703	0.0489	1.9473
BH-18-02-Grain6-3	44.5136	0.5739	11.9755	16.4184	0.4542	11.1567	11.8724	1.265	1.3996	2.6646	0.3601	2.4416	2.0723	6.5359	0.2621	1.8677	0.0634	0.0565	2.016
BH-18-02-Grain7-1	43.4397	0.4968	11.1872	16.0017	0.3929	11.0501	11.9772	1.1111	1.2265	2.3376	0.3254	2.4876	1.9914	6.561	0.2363	1.9382	0.0564	0.0503	2.0212
BH-18-02-Grain7-2	44.4405	0.4879	10.6289	16.2378	0.4134	11.3939	12.2845	1.0558	1.1706	2.2264	0.3052	2.5323	1.8679	6.6265	0.2227	1.9626	0.0547	0.0522	2.0248
BH-18-02-Grain7-3	46.2339	0.3393	9.449	15.3177	0.3486	12.6771	11.9647	1.1375	0.8823	2.0198	0.3248	2.7829	1.6401	6.8092	0.1658	1.888	0.0376	0.0435	1.8866
BH-18-02-Grain8-1	48.0154	0.3418	8.528	14.1075	0.3373	13.5983	12.3764	0.9877	0.7791	1.7668	0.2776	2.9377	1.4568	6.9593	0.144	1.9219	0.0373	0.0414	1.71
BH-18-02-Grain8-2	47.5371	0.2946	7.9956	13.5405	0.4774	13.3876	12.3099	0.8916	0.6875	1.5791	0.2551	2.9453	1.3909	7.0165	0.1294	1.9467	0.0327	0.0597	1.6714
BH-18-02-Grain8-3	47.2992	0.3034	8.7977	14.182	0.2879	13.5252	12.4338	1.0926	0.7742	1.8668	0.3089	2.9393	1.5118	6.8964	0.144	1.9424	0.0333	0.0356	1.7293
BH-18-02-Grain9-1	46.1802	0.3048	8.889	14.928	0.472	12.7949	12.2136	1.1115	0.7563	1.8678	0.3195	2.8274	1.5532	6.8466	0.143	1.9401	0.034	0.0593	1.8509
BH-18-02-Grain9-2	50.9933	0.1315	5.1544	12.1851	0.3842	15.0236	12.9389	0.5984	0.3549	0.9533	0.168	3.2418	0.8794	7.3822	0.0655	2.0069	0.0143	0.0471	1.4752
BH-18-02-Grain9-3	48.4486	0.2357	7.8055	14.2475	0.4154	13.2526	12.525	0.9029	0.6129	1.5158	0.2552	2.8799	1.3412	7.0635	0.114	1.9565	0.0258	0.0513	1.7371
BH-18-02-Grain10-1	45.2808	0.4325	10.6918	15.6077	0.3771	11.6314	12.124	1.1665	1.1856	2.3521	0.3341	2.561	1.8614	6.6889	0.2234	1.9189	0.048	0.0472	1.9281
BH-18-02-Grain10-2	44.9969	0.512	10.8114	15.6391	0.4385	11.5856	12.0563	1.1495	1.1478	2.2973	0.3299	2.5565	1.8864	6.6615	0.2168	1.9123	0.057	0.055	1.9362
BH-18-02-Grain10-3	45.7223	0.3999	9.6041	15.6819	0.4304	12.0303	12.3092	1.0083	0.9214	1.9297	0.2897	2.6575	1.6776	6.7764	0.1742	1.9546	0.0446	0.054	1.9437
BH-18-02-Grain11-1	43.427	0.6224	12.3774	16.1564	0.3602	11.0291	11.8422	1.3481	1.5551	2.9032	0.3881	2.4407	2.1658	6.4476	0.2945	1.8838	0.0695	0.0453	2.006
BH-18-02-Grain11-2	43.0986	0.53	11.783	16.4264	0.3517	10.6037	12.0697	1.3455	1.3083	2.6538	0.3928	2.38	2.0912	6.4901	0.2513	1.9473	0.06	0.0449	2.0686
BH-18-02-Grain11-3	42.4739	0.5292	11.9882	16.1238	0.3396	10.6935	11.9827	1.2231	1.4698	2.6929	0.3597	2.418	2.1434	6.4435	0.2844	1.9477	0.0604	0.0436	2.0456
BH-18-02-Grain12-1	43.9786	0.4473	10.5645	16.4913	0.3477	11.0633	12.2405	1.1183	1.2155	2.3338	0.3262	2.4812	1.8735	6.6174	0.2333	1.9733	0.0506	0.0443	2.0752
BH-18-02-Grain12-2	42.106	0.4893	10.4649	16.6179	0.2493	10.6643	12.0889	1.0469	1.1902	2.2371	0.315	2.4672	1.9144	6.5356	0.2357	2.0104	0.0571	0.0328	2.1571
BH-18-02-Grain12-3	44.1516	0.541	10.6462	16.9263	0.2821	10.9082	12.309	1.2098	1.1775	2.3873	0.351	2.4329	1.8776	6.6068	0.2248	1.9735	0.0609	0.0358	2.1182
BH-18-02-Grain13-1	45.4616	0.4212	9.7878	14.1964	0.3657	12.5432	11.729	1.2417	1.1721	2.4138	0.359	2.7876	1.72	6.7785	0.2229	1.8737	0.0472	0.0462	1.7702
BH-18-02-Grain13-2	46.4746	0.4291	9.7088	14.3441	0.3698	12.8039	11.822	1.238	1.0865	2.3245	0.3523	2.8009	1.6794	6.8209	0.2034	1.859	0.0474	0.046	1.7606
BH-18-02-Grain13-3	46.0574	0.3867	9.7636	15.1319	0.4186	12.8797	11.7791	1.2211	0.9674	2.1885	0.3478	2.8198	1.6902	6.7652	0.1813	1.8537	0.0427	0.0521	1.8588
BH-18-02-Grain14-1	44.2973	0.5529	11.3201	15.2738	0.4305	11.6985	12.1662	1.3115	1.2737	2.5852	0.377	2.5852	1.978	6.5676	0.2409	1.9326	0.0616	0.0541	1.8938
BH-18-02-Grain14-2	44.7315	0.5357	11.9475	15.618	0.4181	11.8083	11.9144	1.3187	1.2408	2.5595	0.374	2.5744	2.0597	6.543	0.2315	1.8672	0.0589	0.0518	1.9105
BH-18-02-Grain14-3	44.259	0.5808	11.3802	15.282	0.4305	11.7648	12.0742	1.2857	1.1808	2.4665	0.3696	2.5999	1.9886	6.5621	0.2233	1.918	0.0648	0.0541	1.8949
BH-18-02-Grain15-1	43.6955	0.6167	12.8028	15.2749	0.4017	11.4755	11.7654	1.3717	1.3979	2.7696	0.3921	2.5218	2.2247	6.4424	0.2629	1.8586	0.0684	0.0502	1.8834
BH-18-02-Grain15-2	43.6613	0.6842	12.2397	15.2152	0.4018	11.5333	11.9376	1.388	1.3488	2.7368	0.3987	2.5469	2.1372	6.4687	0.2549	1.895	0.0762	0.0504	1.8852
BH-18-02-Grain15-3	43.546	0.6054	12.7274	15.3269	0.3771	11.4436	11.81	1.4475	1.446	2.8935	0.4146	2.52	2.2162	6.4336	0.2725	1.8695	0.0673	0.0472	1.8937
NT-18-03-Grain1-1	44.51	0.5449	11.6869	11.3301	0.4129	13.6943	12.2797	1.8634	0.7834	2.6468	0.532	3.0055	2.0282	6.554	0.1472	1.9373	0.0603	0.0515	1.3952
NT-18-03-Grain1-2	44.6019	0.4794	12.1547	11.2658	0.2767	13.9152	12.2157	1.9083	0.6288	2.5371	0.5415	3.0356	2.0966	6.5279	0.1174	1.9156	0.0528	0.0343	1.3789
NT-18-03-Grain1-3	44.1638	0.4429	12.2299	11.4316	0.2807	13.2557	11.9655	1.6548	0.7389	2.3937	0.4759	2.9306	2.1379	6.5506	0.1398	1.9015	0.0494	0.0353	1.418
NT-18-03-Grain2-1	44.862	0.523	12.3823	11.75	0.3549	13.4879	12.1083	1.934	0.6579	2.5919	0.5462	2.9284	2.1257	6.5347	0.1222	1.8897	0.0573	0.0438	1.4313
NT-18-03-Grain2-2	44.8445	0.5569	12.1817	11.8182	0.3301	13.9546	12.1721	1.8582	0.6964	2.5546	0.5234	3.0218	2.0858	6.5152	0.1291	1.8947	0.0608	0.0406	1.4359
NT-18-03-Grain2-3	45.6189	0.5272	12.4472	12.1312	0.3589	13.8421	11.9458	1.9804	0.66	2.6404	0.5511	2.9611	2.1054	6.5472	0.1208	1.8369	0.0569	0.0436	1.456
NT-18-03-Grain3-1	45.0136	0.4788	12.2383	11.9287	0.2847	13.913	12.121	1.8424	0.7489	2.5913	0.5181	3.0076	2.0919	6.5283	0.1385	1.8835	0.0522	0.035	1.4468
NT-18-03-Grain3-2	44.7329	0.5356	12.4564	11.5889	0.3385	14.1376	11.9481	1.8847	0.6491	2.5338	0.5306	3.06	2.1319	6.4959	0.1202	1.859	0.0585	0.0416	1.4074
NT-18-03-Grain3-3	44.7802	0.5031	12.1943	11.3179	0.3345	13.9603	12.0284	1.8927	0.6593	2.552	0.5356	3.0372	2.0978	6.5363	0.1228	1.8811	0.0552	0.0414	1.3815
NT-18-03-Grain4-1	44.6511	0.4726	12.3904	11.1542	0.3842	14.2352	12.0023	1.9725	0.7266	2.6991	0.5566	3.0882	2.1254	6.4989	0.1349	1.8717	0.0517	0.0474	1.3577
NT-18-03-Grain4-2	44.7762	0.4938	12.4215	11.5512	0.3303	14.0374	11.9722	1.8007	0.7548	2.5555	0.5077	3.0424	2.1288	6.511	0.14	1.8652	0.054	0.0407	1.4047
NT-18-03-Grain4-3	44.7417	0.4499	12.2688	11.1588	0.38	14.3622	11.8915	1.976	0.7406	2.7166	0.5576	3.1154	2.1044	6.5114	0.1375	1.8542	0.0492	0.0468	1.3581
NT-18-03-Grain5-1	44.0148	0.5623	12.8822	12.0932	0.4579	13.1417	12.2794	1.8863	0.8123	2.6986	0.535	2.8652	2.2208	6.4381	0.1516	1.9244	0.0619	0.0567	1.4793
NT-18-03-Grain5-2	44.5385	0.5343	13.1619	11.8487	0.2435	13.9263	11.9477	2.0407	0.7143	2.755	0.5714	2.9978	2.2403	6.4323	0.1316	1.8487	0.058	0.0298	1.4311
NT-18-03-Grain5-3	43.5669	0.5805	12.5123	11.8249	0.2351	13.329	12.0581	1.9412	0.7546	2.6958	0.5572	2.9411	2.1831	6.4496	0.1425	1.9125	0.0646	0.0295	1.464
NT-18-03-Grain6-1	44.9619	0.4407	12.4195	11.393	0.3676	14.3107	11.9808	1.8492	0.7257	2.5749	0.5193	3.0893	2.12	6.512	0.1341	1.8591	0.048	0.0451	1.3799
NT-18-03-Grain6-2	44.7106	0.4535	12.3809	11.0342	0.3512	13.8985	12.0167	1.8136	0.7809	2.5945	0.514	3.0278	2.1327	6.5348	0.1456	1.8818	0.0498	0.0435	1.3487
NT-18-03-Grain6-3	44.5415	0.4411	11.7661	11.01	0.2809	13.4761	12.036	1.6943	0.7366	2.4309	0.4872	2.9789	2.0565	6.6057	0.1393	1.9125	0.0492	0.0353	1.3655
NT-18-03-Grain7-1	45.9253	0.4871	12.6341	11.7395	0.3633	14.2704	12.355	1.8613	0.6546	2.5159	0.5131	3.0241	2.117	6.5294	0.1187	1.882	0.0521	0.0438	1.3958
NT-18-03-Grain7-2	44.2373	0.5037	12.4532	11.667	0.3549	14.1787	12.0345	1.9619	0.6148	2.5767	0.555	3.0837	2.1416	6.4549	0.1144	1.8814	0.0553	0.0439	1.4237
NT-18-03-Grain7-3	43.8726	0.5046	12.1011	11.8124	0.4084	13.714	12.138	1.8822	0.6711	2.5533	0.5387	3.0172	2.1052	6.4759	0.1264	1.9196	0.056	0.0511	1.4581
NT-18-03-Grain8-1	45.1751	0.4577	12.2601	11.2669	0.4832	14.2746	11.9669	1.9052	0.7046	2.6098	0.5345	3.0789	2.091	6.5373	0.1301	1.8554	0.0498	0.0592	1.3635
NT-18-03-Grain8-2	45.7204	0.4695	12.3604	11.0112	0.4009	14.3276	12.2316	1.8669	0.7986	2.6655	0.5193	3.0636	2.0898	6.5589	0.1462	1.88	0.0507	0.0487	1.321
NT-18-03-Grain8-3	45.2859	0.4686	12.5979	11.7042	0.4334	14.1826	11.8121	1.9441	0.791	2.7351	0.5422	3.0409	2.1358	6.5144	0.1452	1.8205	0.0507	0.0528	1.408
NT-18-03-Grain9-1	43.9198	0.5189	12.1893	11.3953	0.3385	13.7216	12.4095	1.808	0.6437	2.4517	0.5172	3.0174	2.1195	6.4796	0.1211	1.9616	0.0576	0.0423	1.406
NT-18-03-Grain9-2	44.5458	0.5476	12.6346	11.9698	0.4001	13.7978	12.204	1.8868	0.753	2.6398	0.5307	2.9833	2.1601	6.462	0.1393	1.8968	0.0597	0.0492	1.4521
NT-18-03-Grain9-3	43.5992	0.496	12.3496	11.7693	0.3467	13.8538	12.3262	1.8609	0.7089	2.5698	0.5319	3.0439	2.1456	6.4271	0.1333	1.9468	0.055	0.0433	1.4509
NT-18-03-Grain10-1	44.1809	0.4694	12.6418	12.0204	0.3629	13.6328	11.9873	1.7558	0.7192	2.475	0.4984	2.9749	2.1813	6.4682	0.1343	1.8803	0.0517	0.045	1.4717
NT-18-03-Grain10-2	44.7611	0.5137	12.8389	12.2734	0.4002	13.635	12.2627	1.8857	0.6769	2.5626	0.5278	2.934	2.1845	6.462	0.1247	1.8968	0.0558	0.0489	1.4818
NT-18-03-Grain10-3	44.3144	0.4664	13.0517	11.866	0.4334	13.4854	12.1829	1.8912	0.7176	2.6088	0.5333	2.9234	2.2372	6.4452	0.1331	1.8984	0.051	0.0534	1.4433
NT-18-03-Grain11-1	45.3449	0.5007	12.329	11.5371	0.318	14.0987	12.0055	1.8573	0.71	2.5673	0.52	3.0343	2.0981	6.5475	0.1308	1.8573	0.0544	0.0389	1.3932
NT-18-03-Grain11-2	45.2509	0.5141	12.2502	11.5966	0.3633	14.6004	11.9643	1.91	0.7165	2.6265	0.5329	3.1317	2.0777	6.5119	0.1315	1.8447	0.0556	0.0443	1.3956
NT-18-03-Grain11-3	45.3757	0.5076	12.3003	11.3402	0.38	14.4223	11.9631	1.9991	0.6634	2.6625	0.5581	3.0952	2.0873	6.5333	0.1218	1.8455	0.055	0.0463	1.3655
NT-18-03-Grain12-1	45.2383	0.4388	11.5971	11.2459	0.3431	14.6175	11.9695	1.7679	0.718	2.4859	0.4986	3.1692	1.9882	6.5804	0.1332	1.8654	0.048	0.0423	1.368
NT-18-03-Grain12-2	46.4156	0.422	11.7817	11.1688	0.3431	14.58	12.3661	1.8435	0.7049	2.5484	0.5102	3.1018	1.9819	6.6249	0.1283	1.8911	0.0453	0.0415	1.3332
NT-18-03-Grain12-3	45.0284	0.4838	11.5872	11.3989	0.3139	14.5205	12.0068	1.7381	0.6612	2.3993	0.4915	3.1569	1.992	6.568	0.123	1.8764	0.0531	0.0388	1.3905

## Sheet: Probe-Amph 3.0
PROBE-AMPH an amphibole structural formula calculator and classifier (with barometers)
For microprobe analyses: i.e. H2O, Fe2O3 and Li2O not analysed
Based on 23 oxygens with Fe2+/Fe3+ estimation assuming ∑13 cations - except for Fe-Mg-Mn amphiboles where ∑15 is applied.
The method cannot distinguish between orthorhombic and monoclinic Fe-Mg-Mn amphiboles.
See Leake, (1978) Miner. Mag.; Rock and Leake, (1984) Miner. Mag. and Mogessie et al., (1990) Computers and Geosciences for classification info.
See Hammarstrom and Zen (1986), Hollister et al. (1987), Johnson and Rutherford (1989) and Schmidt (1992) for geobarometry info.
Input data here
Sample number	BH-18-02-Grain1-2	BH-18-02-Grain1-3	BH-18-02-Grain2-1	BH-18-02-Grain2-2	BH-18-02-Grain2-3	BH-18-02-Grain3-1	BH-18-02-Grain3-2	BH-18-02-Grain3-3	BH-18-02-Grain4-1	BH-18-02-Grain4-2	BH-18-02-Grain4-3	BH-18-02-Grain5-1	BH-18-02-Grain5-2	BH-18-02-Grain5-3	BH-18-02-Grain6-1	BH-18-02-Grain6-2	BH-18-02-Grain6-3	BH-18-02-Grain7-1	BH-18-02-Grain7-2	BH-18-02-Grain7-3	BH-18-02-Grain8-1	BH-18-02-Grain8-2	BH-18-02-Grain8-3	BH-18-02-Grain9-1	BH-18-02-Grain9-2	BH-18-02-Grain9-3	BH-18-02-Grain10-1	BH-18-02-Grain10-2	BH-18-02-Grain10-3	BH-18-02-Grain11-1	BH-18-02-Grain11-2	BH-18-02-Grain11-3	BH-18-02-Grain12-1	BH-18-02-Grain12-2	BH-18-02-Grain12-3	BH-18-02-Grain13-1	BH-18-02-Grain13-2	BH-18-02-Grain13-3	BH-18-02-Grain14-1	BH-18-02-Grain14-2	BH-18-02-Grain14-3	BH-18-02-Grain15-1	BH-18-02-Grain15-2	BH-18-02-Grain15-3	NT-18-03-Grain1-1	NT-18-03-Grain1-2	NT-18-03-Grain1-3	NT-18-03-Grain2-1	NT-18-03-Grain2-2
SiO2	46.1889	48.9435	44.7309	44.3911	44.6932	42.6611	43.4697	42.8258	50.74	54.4109	53.9147	48.6048	49.5507	50.1416	42.3228	43.6497	44.5136	43.4397	44.4405	46.2339	48.0154	47.5371	47.2992	46.1802	50.9933	48.4486	45.2808	44.9969	45.7223	43.427	43.0986	42.4739	43.9786	42.106	44.1516	45.4616	46.4746	46.0574	44.2973	44.7315	44.259	43.6955	43.6613	43.546	44.51	44.6019	44.1638	44.862	44.8445
TiO2	0.3755	0.2191	0.5507	0.5579	0.6393	0.6293	0.6837	0.6766	0.1644	0.0546	0.0773	0.255	0.1942	0.2159	0.5092	0.6307	0.5739	0.4968	0.4879	0.3393	0.3418	0.2946	0.3034	0.3048	0.1315	0.2357	0.4325	0.512	0.3999	0.6224	0.53	0.5292	0.4473	0.4893	0.541	0.4212	0.4291	0.3867	0.5529	0.5357	0.5808	0.6167	0.6842	0.6054	0.5449	0.4794	0.4429	0.523	0.5569
Al2O3	9.6929	7.133	11.0514	10.7013	11.2893	13.002	12.9274	13.0984	5.1754	2.5898	2.9965	7.7647	7.4182	6.6198	11.859	12.0289	11.9755	11.1872	10.6289	9.449	8.528	7.9956	8.7977	8.889	5.1544	7.8055	10.6918	10.8114	9.6041	12.3774	11.783	11.9882	10.5645	10.4649	10.6462	9.7878	9.7088	9.7636	11.3201	11.9475	11.3802	12.8028	12.2397	12.7274	11.6869	12.1547	12.2299	12.3823	12.1817
FeO	15.0861	13.0772	15.0796	15.8066	15.1869	16.1565	15.6549	15.4781	12.0879	10.52	11.0049	13.7416	13.6568	13.1783	15.8047	15.7011	16.4184	16.0017	16.2378	15.3177	14.1075	13.5405	14.182	14.928	12.1851	14.2475	15.6077	15.6391	15.6819	16.1564	16.4264	16.1238	16.4913	16.6179	16.9263	14.1964	14.3441	15.1319	15.2738	15.618	15.282	15.2749	15.2152	15.3269	11.3301	11.2658	11.4316	11.75	11.8182
MnO	0.4102	0.4737	0.2747	0.3605	0.4673	0.323	0.5075	0.3358	0.3099	0.3648	0.3812	0.3869	0.3789	0.2679	0.3602	0.3892	0.4542	0.3929	0.4134	0.3486	0.3373	0.4774	0.2879	0.472	0.3842	0.4154	0.3771	0.4385	0.4304	0.3602	0.3517	0.3396	0.3477	0.2493	0.2821	0.3657	0.3698	0.4186	0.4305	0.4181	0.4305	0.4017	0.4018	0.3771	0.4129	0.2767	0.2807	0.3549	0.3301
MgO	12.2587	14.3767	11.5598	11.7158	11.5981	10.484	10.6432	10.6063	15.1528	16.8846	16.7319	13.7295	14.26	14.8186	10.8568	11.5566	11.1567	11.0501	11.3939	12.6771	13.5983	13.3876	13.5252	12.7949	15.0236	13.2526	11.6314	11.5856	12.0303	11.0291	10.6037	10.6935	11.0633	10.6643	10.9082	12.5432	12.8039	12.8797	11.6985	11.8083	11.7648	11.4755	11.5333	11.4436	13.6943	13.9152	13.2557	13.4879	13.9546
CaO	12.257	12.1835	12.044	12.1922	12.3994	11.2579	11.1824	11.2624	12.7727	12.9577	12.6723	11.9587	12.1446	12.0463	11.9777	11.8912	11.8724	11.9772	12.2845	11.9647	12.3764	12.3099	12.4338	12.2136	12.9389	12.525	12.124	12.0563	12.3092	11.8422	12.0697	11.9827	12.2405	12.0889	12.309	11.729	11.822	11.7791	12.1662	11.9144	12.0742	11.7654	11.9376	11.81	12.2797	12.2157	11.9655	12.1083	12.1721
Na2O	1.0276	0.9358	1.2606	1.3007	1.2115	1.6517	1.4877	1.6754	0.6549	0.2729	0.3395	0.9781	0.9964	0.8529	1.2373	1.3611	1.265	1.1111	1.0558	1.1375	0.9877	0.8916	1.0926	1.1115	0.5984	0.9029	1.1665	1.1495	1.0083	1.3481	1.3455	1.2231	1.1183	1.0469	1.2098	1.2417	1.238	1.2211	1.3115	1.3187	1.2857	1.3717	1.388	1.4475	1.8634	1.9083	1.6548	1.934	1.8582
K2O	1.028	0.5921	1.0669	1.1333	1.2563	1.4158	1.5084	1.5483	0.4157	0.1633	0.1633	0.4847	0.519	0.5386	1.3308	1.3071	1.3996	1.2265	1.1706	0.8823	0.7791	0.6875	0.7742	0.7563	0.3549	0.6129	1.1856	1.1478	0.9214	1.5551	1.3083	1.4698	1.2155	1.1902	1.1775	1.1721	1.0865	0.9674	1.2737	1.2408	1.1808	1.3979	1.3488	1.446	0.7834	0.6288	0.7389	0.6579	0.6964
BaO
SrO
PbO
ZnO
F
Cl
Cr2O3
NiO
Reformatted oxide %
	BH-18-02-Grain1-2	BH-18-02-Grain1-3	BH-18-02-Grain2-1	BH-18-02-Grain2-2	BH-18-02-Grain2-3	BH-18-02-Grain3-1	BH-18-02-Grain3-2	BH-18-02-Grain3-3	BH-18-02-Grain4-1	BH-18-02-Grain4-2	BH-18-02-Grain4-3	BH-18-02-Grain5-1	BH-18-02-Grain5-2	BH-18-02-Grain5-3	BH-18-02-Grain6-1	BH-18-02-Grain6-2	BH-18-02-Grain6-3	BH-18-02-Grain7-1	BH-18-02-Grain7-2	BH-18-02-Grain7-3	BH-18-02-Grain8-1	BH-18-02-Grain8-2	BH-18-02-Grain8-3	BH-18-02-Grain9-1	BH-18-02-Grain9-2	BH-18-02-Grain9-3	BH-18-02-Grain10-1	BH-18-02-Grain10-2	BH-18-02-Grain10-3	BH-18-02-Grain11-1	BH-18-02-Grain11-2	BH-18-02-Grain11-3	BH-18-02-Grain12-1	BH-18-02-Grain12-2	BH-18-02-Grain12-3	BH-18-02-Grain13-1	BH-18-02-Grain13-2	BH-18-02-Grain13-3	BH-18-02-Grain14-1	BH-18-02-Grain14-2	BH-18-02-Grain14-3	BH-18-02-Grain15-1	BH-18-02-Grain15-2	BH-18-02-Grain15-3	NT-18-03-Grain1-1	NT-18-03-Grain1-2	NT-18-03-Grain1-3	NT-18-03-Grain2-1	NT-18-03-Grain2-2
SiO2	46.1889	48.9435	44.7309	44.3911	44.6932	42.6611	43.4697	42.8258	50.74	54.4109	53.9147	48.6048	49.5507	50.1416	42.3228	43.6497	44.5136	43.4397	44.4405	46.2339	48.0154	47.5371	47.2992	46.1802	50.9933	48.4486	45.2808	44.9969	45.7223	43.427	43.0986	42.4739	43.9786	42.106	44.1516	45.4616	46.4746	46.0574	44.2973	44.7315	44.259	43.6955	43.6613	43.546	44.51	44.6019	44.1638	44.862	44.8445
TiO2	0.3755	0.2191	0.5507	0.5579	0.6393	0.6293	0.6837	0.6766	0.1644	0.0546	0.0773	0.255	0.1942	0.2159	0.5092	0.6307	0.5739	0.4968	0.4879	0.3393	0.3418	0.2946	0.3034	0.3048	0.1315	0.2357	0.4325	0.512	0.3999	0.6224	0.53	0.5292	0.4473	0.4893	0.541	0.4212	0.4291	0.3867	0.5529	0.5357	0.5808	0.6167	0.6842	0.6054	0.5449	0.4794	0.4429	0.523	0.5569
Al2O3	9.6929	7.133	11.0514	10.7013	11.2893	13.002	12.9274	13.0984	5.1754	2.5898	2.9965	7.7647	7.4182	6.6198	11.859	12.0289	11.9755	11.1872	10.6289	9.449	8.528	7.9956	8.7977	8.889	5.1544	7.8055	10.6918	10.8114	9.6041	12.3774	11.783	11.9882	10.5645	10.4649	10.6462	9.7878	9.7088	9.7636	11.3201	11.9475	11.3802	12.8028	12.2397	12.7274	11.6869	12.1547	12.2299	12.3823	12.1817
Cr2O3	0	0	0	0	0	0	0	0	0	0	0	0	0	0	0	0	0	0	0	0	0	0	0	0	0	0	0	0	0	0	0	0	0	0	0	0	0	0	0	0	0	0	0	0	0	0	0	0	0
Fe2O3	4.24412	4.78316	3.76762	4.90653	3.3776	5.93114	5.77485	4.82614	1.79102	0.987531	2.65749	5.23341	5.21243	5.47526	4.99142	6.23822	5.95402	5.23154	5.00018	6.38815	4.62517	3.71462	4.70322	5.44302	1.30961	3.19725	4.29348	4.85286	4.88347	5.54568	4.21615	4.79739	4.4481	4.98179	4.15871	4.72559	4.97802	7.32968	4.45397	6.38056	5.21729	6.09201	5.23214	5.67057	3.03214	4.05659	3.86492	3.92013	5.19043
FeO	11.267	8.77308	11.6893	11.3915	12.1476	10.8194	10.4584	11.1353	10.4763	9.63137	8.61357	9.03233	8.96641	8.2514	11.3132	10.0877	11.0607	11.2941	11.7384	9.56934	9.94555	10.1979	9.94983	10.0301	11.0067	11.3705	11.7442	11.2723	11.2875	11.1661	12.6325	11.8069	12.4887	12.1351	13.1841	9.94409	9.86465	8.53631	11.2659	9.87647	10.5872	9.79302	10.5071	10.2243	8.60164	7.61549	7.95376	8.22248	7.14761
MnO	0.4102	0.4737	0.2747	0.3605	0.4673	0.323	0.5075	0.3358	0.3099	0.3648	0.3812	0.3869	0.3789	0.2679	0.3602	0.3892	0.4542	0.3929	0.4134	0.3486	0.3373	0.4774	0.2879	0.472	0.3842	0.4154	0.3771	0.4385	0.4304	0.3602	0.3517	0.3396	0.3477	0.2493	0.2821	0.3657	0.3698	0.4186	0.4305	0.4181	0.4305	0.4017	0.4018	0.3771	0.4129	0.2767	0.2807	0.3549	0.3301
MgO	12.2587	14.3767	11.5598	11.7158	11.5981	10.484	10.6432	10.6063	15.1528	16.8846	16.7319	13.7295	14.26	14.8186	10.8568	11.5566	11.1567	11.0501	11.3939	12.6771	13.5983	13.3876	13.5252	12.7949	15.0236	13.2526	11.6314	11.5856	12.0303	11.0291	10.6037	10.6935	11.0633	10.6643	10.9082	12.5432	12.8039	12.8797	11.6985	11.8083	11.7648	11.4755	11.5333	11.4436	13.6943	13.9152	13.2557	13.4879	13.9546
NiO	0	0	0	0	0	0	0	0	0	0	0	0	0	0	0	0	0	0	0	0	0	0	0	0	0	0	0	0	0	0	0	0	0	0	0	0	0	0	0	0	0	0	0	0	0	0	0	0	0
ZnO	0	0	0	0	0	0	0	0	0	0	0	0	0	0	0	0	0	0	0	0	0	0	0	0	0	0	0	0	0	0	0	0	0	0	0	0	0	0	0	0	0	0	0	0	0	0	0	0	0
Li2O* (not implemented)
CaO	12.257	12.1835	12.044	12.1922	12.3994	11.2579	11.1824	11.2624	12.7727	12.9577	12.6723	11.9587	12.1446	12.0463	11.9777	11.8912	11.8724	11.9772	12.2845	11.9647	12.3764	12.3099	12.4338	12.2136	12.9389	12.525	12.124	12.0563	12.3092	11.8422	12.0697	11.9827	12.2405	12.0889	12.309	11.729	11.822	11.7791	12.1662	11.9144	12.0742	11.7654	11.9376	11.81	12.2797	12.2157	11.9655	12.1083	12.1721
Na2O	1.0276	0.9358	1.2606	1.3007	1.2115	1.6517	1.4877	1.6754	0.6549	0.2729	0.3395	0.9781	0.9964	0.8529	1.2373	1.3611	1.265	1.1111	1.0558	1.1375	0.9877	0.8916	1.0926	1.1115	0.5984	0.9029	1.1665	1.1495	1.0083	1.3481	1.3455	1.2231	1.1183	1.0469	1.2098	1.2417	1.238	1.2211	1.3115	1.3187	1.2857	1.3717	1.388	1.4475	1.8634	1.9083	1.6548	1.934	1.8582
K2O	1.028	0.5921	1.0669	1.1333	1.2563	1.4158	1.5084	1.5483	0.4157	0.1633	0.1633	0.4847	0.519	0.5386	1.3308	1.3071	1.3996	1.2265	1.1706	0.8823	0.7791	0.6875	0.7742	0.7563	0.3549	0.6129	1.1856	1.1478	0.9214	1.5551	1.3083	1.4698	1.2155	1.1902	1.1775	1.1721	1.0865	0.9674	1.2737	1.2408	1.1808	1.3979	1.3488	1.446	0.7834	0.6288	0.7389	0.6579	0.6964
BaO	0	0	0	0	0	0	0	0	0	0	0	0	0	0	0	0	0	0	0	0	0	0	0	0	0	0	0	0	0	0	0	0	0	0	0	0	0	0	0	0	0	0	0	0	0	0	0	0	0
SrO	0	0	0	0	0	0	0	0	0	0	0	0	0	0	0	0	0	0	0	0	0	0	0	0	0	0	0	0	0	0	0	0	0	0	0	0	0	0	0	0	0	0	0	0	0	0	0	0	0
PbO	0	0	0	0	0	0	0	0	0	0	0	0	0	0	0	0	0	0	0	0	0	0	0	0	0	0	0	0	0	0	0	0	0	0	0	0	0	0	0	0	0	0	0	0	0	0	0	0	0
F	0	0	0	0	0	0	0	0	0	0	0	0	0	0	0	0	0	0	0	0	0	0	0	0	0	0	0	0	0	0	0	0	0	0	0	0	0	0	0	0	0	0	0	0	0	0	0	0	0
Cl	0	0	0	0	0	0	0	0	0	0	0	0	0	0	0	0	0	0	0	0	0	0	0	0	0	0	0	0	0	0	0	0	0	0	0	0	0	0	0	0	0	0	0	0	0	0	0	0	0
H2O*	2.05587	2.08242	2.03541	2.03924	2.04969	2.02678	2.04375	2.02539	2.0741	2.11695	2.12138	2.08127	2.10907	2.10918	1.99259	2.05255	2.07139	2.01096	2.03548	2.0673	2.09151	2.04974	2.07962	2.04919	2.07768	2.07236	2.05092	2.04923	2.04716	2.04682	2.0119	2.00007	2.01461	1.95624	2.02423	2.03422	2.06747	2.07736	2.04431	2.08126	2.04798	2.06363	2.04955	2.05737	2.05126	2.06865	2.04056	2.07777	2.08938
	100.806	100.496	100.031	100.69	101.129	100.202	100.687	100.016	99.7272	100.434	100.669	100.509	101.75	101.337	98.751	101.193	102.297	99.4181	100.65	101.057	101.626	99.5436	101.247	100.245	99.9731	100.839	100.978	100.872	100.644	101.32	99.9511	99.3043	99.9271	97.3729	100.592	99.4262	100.843	101.417	100.815	102.253	100.809	101.476	100.983	101.355	99.4605	99.9214	98.5914	100.531	101.022
O=F,Cl	0	0	0	0	0	0	0	0	0	0	0	0	0	0	0	0	0	0	0	0	0	0	0	0	0	0	0	0	0	0	0	0	0	0	0	0	0	0	0	0	0	0	0	0	0	0	0	0	0
Total	100.806	100.496	100.031	100.69	101.129	100.202	100.687	100.016	99.7272	100.434	100.669	100.509	101.75	101.337	98.751	101.193	102.297	99.4181	100.65	101.057	101.626	99.5436	101.247	100.245	99.9731	100.839	100.978	100.872	100.644	101.32	99.9511	99.3043	99.9271	97.3729	100.592	99.4262	100.843	101.417	100.815	102.253	100.809	101.476	100.983	101.355	99.4605	99.9214	98.5914	100.531	101.022
No. of oxygens	23	23	23	23	23	23	23	23	23	23	23	23	23	23	23	23	23	23	23	23	23	23	23	23	23	23	23	23	23	23	23	23	23	23	23	23	23	23	23	23	23	23	23	23	23	23	23	23	23
Structural formulae
Si	6.73656	7.04731	6.58951	6.52716	6.53807	6.31134	6.37757	6.34006	7.33531	7.70676	7.62054	7.00241	7.04461	7.12825	6.36876	6.37654	6.44359	6.47712	6.54649	6.70584	6.88363	6.95393	6.81974	6.75727	7.35921	7.00992	6.62008	6.58399	6.69691	6.36177	6.42325	6.36758	6.54556	6.45384	6.5401	6.70106	6.74021	6.64792	6.49722	6.44444	6.47996	6.34894	6.38758	6.3465	6.5063	6.46491	6.48955	6.47408	6.4356
Al iv	1.26344	0.952694	1.41049	1.47284	1.46193	1.68866	1.62243	1.65994	0.664694	0.293236	0.379457	0.997593	0.955388	0.871754	1.63124	1.62346	1.55641	1.52288	1.45351	1.29416	1.11637	1.04607	1.18026	1.24273	0.640794	0.990082	1.37992	1.41601	1.30309	1.63823	1.57675	1.63242	1.45444	1.54616	1.4599	1.29894	1.25979	1.35208	1.50278	1.55556	1.52004	1.65106	1.61242	1.6535	1.4937	1.53509	1.51045	1.52592	1.5644
Al vi	0.402717	0.257795	0.508277	0.381648	0.484486	0.578389	0.612895	0.62548	0.21711	0.139091	0.119718	0.320825	0.287597	0.237394	0.471995	0.447591	0.486684	0.443086	0.391841	0.321092	0.324565	0.33244	0.314749	0.290223	0.235917	0.340963	0.462382	0.448434	0.354834	0.498782	0.492947	0.485784	0.398731	0.344314	0.398736	0.401432	0.399739	0.308865	0.454087	0.473105	0.44369	0.541394	0.498006	0.532678	0.519732	0.541329	0.607572	0.580094	0.495978
Ti	0.0411946	0.0237301	0.0610225	0.0617041	0.0703465	0.0700288	0.0754508	0.0753441	0.0178772	0.00581712	0.00821841	0.0276336	0.0207676	0.023087	0.0576366	0.0693037	0.0624886	0.0557193	0.0540617	0.0370174	0.0368586	0.032416	0.0329048	0.0335475	0.0142749	0.025652	0.0475625	0.0563516	0.0440583	0.0685831	0.0594151	0.0596763	0.0500765	0.056413	0.0602789	0.0467	0.0468108	0.0419846	0.0609995	0.0580528	0.0639627	0.0674013	0.0752926	0.0663679	0.0599133	0.0522681	0.0489534	0.0567715	0.0601155
Cr	0	0	0	0	0	0	0	0	0	0	0	0	0	0	0	0	0	0	0	0	0	0	0	0	0	0	0	0	0	0	0	0	0	0	0	0	0	0	0	0	0	0	0	0	0	0	0	0	0
Fe3+	0.465815	0.518284	0.417674	0.54291	0.371827	0.660317	0.637579	0.537666	0.194847	0.10526	0.282667	0.567385	0.557664	0.585753	0.565235	0.685787	0.648589	0.587014	0.554293	0.697257	0.498987	0.408918	0.510309	0.59935	0.142228	0.348123	0.472371	0.534354	0.53827	0.61136	0.472859	0.541231	0.498201	0.574625	0.463577	0.524179	0.543299	0.796152	0.491612	0.691761	0.574831	0.666116	0.576028	0.621924	0.333542	0.442481	0.427379	0.425721	0.560541
Fe2+	1.37425	1.05642	1.44009	1.40076	1.48612	1.33859	1.28319	1.37862	1.26657	1.14085	1.01816	1.08824	1.06606	0.980998	1.42371	1.2324	1.33898	1.40833	1.44609	1.16073	1.1924	1.24757	1.19974	1.22738	1.3284	1.37583	1.43592	1.37935	1.38261	1.36797	1.57448	1.48028	1.55446	1.55551	1.63322	1.2258	1.19645	1.03041	1.38189	1.18995	1.29631	1.18997	1.28552	1.24616	1.05151	0.923131	0.977409	0.992335	0.85782
Mn	0.0506737	0.057772	0.034276	0.0448972	0.0579015	0.0404742	0.0630653	0.042107	0.0379468	0.043765	0.045637	0.047212	0.0456265	0.0322584	0.0459103	0.0481573	0.0556888	0.0496207	0.0515805	0.0428259	0.040958	0.0591515	0.0351594	0.0584983	0.0469636	0.0509078	0.0466973	0.0543453	0.0533955	0.0446938	0.0443966	0.0431227	0.0438325	0.0323655	0.0353938	0.0456572	0.0454266	0.0511766	0.0534822	0.0510197	0.0533863	0.049437	0.0497892	0.0465509	0.0511219	0.0339707	0.0349362	0.0433802	0.0401246
Mg	2.66535	3.086	2.53866	2.56808	2.52932	2.3122	2.32782	2.34078	3.26565	3.56521	3.5256	2.94871	3.02228	3.14051	2.43551	2.51676	2.40757	2.45623	2.50213	2.74108	2.90623	2.9195	2.90714	2.79101	3.23222	2.85852	2.53507	2.52717	2.62683	2.40861	2.3559	2.38991	2.4547	2.43677	2.4088	2.75623	2.76827	2.77141	2.55793	2.53611	2.56782	2.48568	2.51537	2.48632	2.98418	3.00682	2.90375	2.9017	2.98542
Ni	0	0	0	0	0	0	0	0	0	0	0	0	0	0	0	0	0	0	0	0	0	0	0	0	0	0	0	0	0	0	0	0	0	0	0	0	0	0	0	0	0	0	0	0	0	0	0	0	0
Zn	0	0	0	0	0	0	0	0	0	0	0	0	0	0	0	0	0	0	0	0	0	0	0	0	0	0	0	0	0	0	0	0	0	0	0	0	0	0	0	0	0	0	0	0	0	0	0	0	0
Li* (not implemented)	0	0	0	0	0	0	0	0	0	0	0	0	0	0	0	0	0	0	0	0	0	0	0	0	0	0	0	0	0	0	0	0	0	0	0	0	0	0	0	0	0	0	0	0	0	0	0	0	0
Ca	1.91533	1.87957	1.90096	1.92074	1.94342	1.78445	1.75777	1.78639	1.97837	1.9664	1.91907	1.84591	1.8499	1.83483	1.93113	1.86118	1.84133	1.91341	1.93885	1.85931	1.90103	1.92935	1.92077	1.91477	2.00066	1.94163	1.89912	1.89007	1.93168	1.85869	1.92728	1.92471	1.95192	1.98527	1.95352	1.85233	1.83699	1.82161	1.91189	1.83909	1.89403	1.83159	1.87117	1.84414	1.92319	1.89708	1.88381	1.87215	1.87156
Na	0.290591	0.261258	0.360064	0.37082	0.343629	0.473782	0.423196	0.48091	0.183569	0.0749458	0.0930414	0.273218	0.274662	0.235093	0.361005	0.385524	0.355045	0.321222	0.301557	0.319891	0.274549	0.252886	0.305445	0.315343	0.167443	0.253296	0.330668	0.326117	0.286348	0.382911	0.388806	0.355527	0.322717	0.311127	0.347464	0.354873	0.348126	0.341739	0.372972	0.368363	0.364979	0.386439	0.393719	0.409037	0.528129	0.536307	0.471467	0.541145	0.517047
K	0.191272	0.108763	0.200506	0.212584	0.234455	0.267208	0.282321	0.292416	0.0766666	0.0295074	0.0294458	0.089084	0.0941311	0.0976808	0.255477	0.243597	0.258462	0.233303	0.219987	0.163255	0.142491	0.128301	0.142405	0.141178	0.0653405	0.113131	0.221129	0.214255	0.172168	0.290626	0.248747	0.281106	0.230791	0.23273	0.222514	0.220405	0.201023	0.178136	0.238329	0.228051	0.220549	0.259119	0.251736	0.268852	0.146089	0.116273	0.138514	0.121121	0.127496
Ba	0	0	0	0	0	0	0	0	0	0	0	0	0	0	0	0	0	0	0	0	0	0	0	0	0	0	0	0	0	0	0	0	0	0	0	0	0	0	0	0	0	0	0	0	0	0	0	0	0
Sr	0	0	0	0	0	0	0	0	0	0	0	0	0	0	0	0	0	0	0	0	0	0	0	0	0	0	0	0	0	0	0	0	0	0	0	0	0	0	0	0	0	0	0	0	0	0	0	0	0
Pb	0	0	0	0	0	0	0	0	0	0	0	0	0	0	0	0	0	0	0	0	0	0	0	0	0	0	0	0	0	0	0	0	0	0	0	0	0	0	0	0	0	0	0	0	0	0	0	0	0
F	0	0	0	0	0	0	0	0	0	0	0	0	0	0	0	0	0	0	0	0	0	0	0	0	0	0	0	0	0	0	0	0	0	0	0	0	0	0	0	0	0	0	0	0	0	0	0	0	0
Cl	0	0	0	0	0	0	0	0	0	0	0	0	0	0	0	0	0	0	0	0	0	0	0	0	0	0	0	0	0	0	0	0	0	0	0	0	0	0	0	0	0	0	0	0	0	0	0	0	0
OH*	2	2	2	2	2	2	2	2	2	2	2	2	2	2	2	2	2	2	2	2	2	2	2	2	2	2	2	2	2	2	2	2	2	2	2	2	2	2	2	2	2	2	2	2	2	2	2	2	2
Total	17.3972	17.2496	17.4615	17.5041	17.5215	17.5254	17.4633	17.5597	17.2386	17.0709	17.0416	17.2082	17.2187	17.1676	17.5476	17.4903	17.4548	17.4679	17.4604	17.3425	17.3181	17.3105	17.3686	17.3713	17.2334	17.3081	17.4509	17.4304	17.3902	17.5322	17.5648	17.5613	17.5054	17.5291	17.5235	17.4276	17.3861	17.3415	17.5232	17.4355	17.4796	17.4772	17.5166	17.522	17.5974	17.5497	17.4938	17.5344	17.5161
Calculation scheme	∑13	∑13	∑13	∑13	∑13	∑13	∑13	∑13	∑13	∑13	∑13	∑13	∑13	∑13	∑13	∑13	∑13	∑13	∑13	∑13	∑13	∑13	∑13	∑13	∑13	∑13	∑13	∑13	∑13	∑13	∑13	∑13	∑13	∑13	∑13	∑13	∑13	∑13	∑13	∑13	∑13	∑13	∑13	∑13	∑13	∑13	∑13	∑13	∑13
Amphibole group	Ca	Ca	Ca	Ca	Ca	Ca	Ca	Ca	Ca	Ca	Ca	Ca	Ca	Ca	Ca	Ca	Ca	Ca	Ca	Ca	Ca	Ca	Ca	Ca	Ca	Ca	Ca	Ca	Ca	Ca	Ca	Ca	Ca	Ca	Ca	Ca	Ca	Ca	Ca	Ca	Ca	Ca	Ca	Ca	Ca	Ca	Ca	Ca	Ca
(Ca+Na) (B)	2	2	2	2	2	2	2	2	2	2	2	2	2	2	2	2	2	2	2	2	2	2	2	2	2.00066	2	2	2	2	2	2	2	2	2	2	2	2	2	2	2	2	2	2	2	2	2	2	2	2
Na (B)	0.0846742	0.120433	0.0990369	0.0792633	0.0565808	0.215548	0.242233	0.21361	0.0216271	0.0336008	0.0809257	0.154093	0.150101	0.16517	0.0688708	0.138824	0.158672	0.0865908	0.061147	0.140687	0.0989701	0.0706548	0.0792291	0.0852291	0	0.0583673	0.100878	0.109928	0.0683248	0.141306	0.072717	0.0752918	0.0480782	0.0147331	0.0464764	0.147674	0.163011	0.178388	0.0881096	0.160915	0.10597	0.168407	0.128826	0.155862	0.0768106	0.102921	0.116193	0.127852	0.128444
(Na+K) (A)	0.39719	0.249588	0.461534	0.504141	0.521503	0.525442	0.463285	0.559717	0.238609	0.0708524	0.0415615	0.208209	0.218693	0.167604	0.547611	0.490296	0.454835	0.467935	0.460397	0.342459	0.31807	0.310532	0.368621	0.371292	0.232784	0.30806	0.450919	0.430444	0.390191	0.532231	0.564835	0.56134	0.50543	0.529124	0.523502	0.427604	0.386138	0.341487	0.523191	0.435499	0.479559	0.477152	0.51663	0.522026	0.597408	0.54966	0.493787	0.534414	0.516098
Mg/(Mg+Fe2)	0.659805	0.744975	0.638054	0.647061	0.629899	0.633342	0.644645	0.629342	0.72054	0.757578	0.77592	0.73043	0.739244	0.761981	0.631089	0.671287	0.64261	0.635579	0.633737	0.702515	0.709074	0.700612	0.707872	0.69456	0.708723	0.675078	0.638398	0.646911	0.65516	0.637775	0.599408	0.617517	0.612274	0.610371	0.595939	0.692167	0.698226	0.728968	0.649251	0.680641	0.664527	0.676255	0.661785	0.666131	0.739447	0.765104	0.748166	0.745165	0.776798
Fe3/(Fe3+Alvi)	0.536324	0.667824	0.451075	0.58721	0.434219	0.53307	0.50987	0.462252	0.472978	0.430773	0.702479	0.638796	0.659753	0.711602	0.544946	0.605082	0.571307	0.569861	0.585851	0.684693	0.605896	0.55158	0.618513	0.67375	0.37612	0.505195	0.505343	0.543712	0.602696	0.550705	0.489601	0.526994	0.55545	0.625313	0.537597	0.566306	0.576116	0.720489	0.51984	0.593854	0.564378	0.551644	0.536322	0.538648	0.390897	0.449763	0.412946	0.42326	0.530555
Sum of S2	13	13	13	13	13	13	13	13	13	13	13	13	13	13	13	13	13	13	13	13	13	13	13	13	13	13	13	13	13	13	13	13	13	13	13	13	13	13	13	13	13	13	13	13	13	13	13	13	13
Amphibole names
						potassian-	potassian-	potassian-							potassian-		potassian-													potassian-		potassian-						ferrian-				potassian-	potassian-	potassian-
	magnesio-hornblende	magnesio-hornblende	magnesio-hornblende	edenitic hornblende	edenitic hornblende	magnesian hastingsitic hornblende	tschermakitic hornblende	ferroan pargasitic hornblende	actinolitic hornblende	actinolite	actinolite	magnesio-hornblende	magnesio-hornblende	magnesio-hornblende	magnesian hastingsitic hornblende	tschermakitic hornblende	tschermakitic hornblende	tschermakitic hornblende	magnesio-hornblende	magnesio-hornblende	magnesio-hornblende	magnesio-hornblende	magnesio-hornblende	magnesio-hornblende	actinolitic hornblende	magnesio-hornblende	magnesio-hornblende	magnesio-hornblende	magnesio-hornblende	magnesian hastingsitic hornblende	ferroan pargasitic hornblende	magnesian hastingsitic hornblende	edenitic hornblende	magnesian hastingsitic hornblende	edenitic hornblende	magnesio-hornblende	magnesio-hornblende	magnesio-hornblende	magnesian hastingsitic hornblende	tschermakitic hornblende	tschermakitic hornblende	tschermakitic hornblende	magnesian hastingsitic hornblende	magnesian hastingsitic hornblende	edenitic hornblende	pargasitic hornblende	tschermakitic hornblende	pargasitic hornblende	magnesio-hastingsitic hornblende
Alternative name ?
(monoclinic alternative)
P (kbars)									not valid	not valid	not valid														not valid
Hammarstrom & Zen 86	4.46075	2.16876	5.73141	5.40809	5.87047	7.48324	7.32367	7.57567				2.71164	2.33222	1.65902	6.65929	6.49737	6.35678	5.96882	5.3621	4.2047	3.3279	3.01389	3.59989	3.79075		2.77516	5.34677	5.45815	4.41934	6.82919	6.4906	6.73454	5.40144	5.58907	5.42891	4.63288	4.42741	4.43457	5.92303	6.28416	5.95755	7.10803	6.69545	7.07648	6.20755	6.52436	6.73367	6.67325	6.44372
Hollister et al. 87	4.6371	2.06715	6.06186	5.69933	6.21778	8.02614	7.84722	8.12978				2.67588	2.25044	1.4956	7.10227	6.92071	6.76307	6.32806	5.64777	4.35	3.36688	3.01478	3.67185	3.88585		2.74709	5.63057	5.75545	4.59067	7.29277	6.91311	7.18665	5.69187	5.90225	5.72268	4.8301	4.59972	4.60775	6.27672	6.68165	6.31542	7.60543	7.14282	7.57005	6.59574	6.95098	7.18566	7.11791	6.86056
Johnson & Rutherford 89	3.58783	1.66037	4.6564	4.3845	4.77334	6.1296	5.99542	6.20733				2.11691	1.79783	1.2317	5.4367	5.30053	5.1823	4.85605	4.34582	3.3725	2.63516	2.37109	2.86388	3.02439		2.17032	4.33293	4.42659	3.553	5.57957	5.29483	5.49998	4.3789	4.53669	4.40201	3.73258	3.55979	3.56582	4.81754	5.12123	4.84657	5.81407	5.46711	5.78754	5.0568	5.32323	5.49925	5.44844	5.25542
Schmidt 92	4.92089	2.75193	6.12335	5.81738	6.25494	7.78114	7.63014	7.86861				3.26567	2.90661	2.26955	7.00142	6.84819	6.71514	6.34801	5.77386	4.67858	3.84885	3.5517	4.10624	4.28685		3.32577	5.75935	5.86475	4.8817	7.16219	6.84178	7.07263	5.81108	5.98864	5.83708	5.08377	4.88934	4.89612	6.30468	6.64642	6.33734	7.42607	7.03564	7.39622	6.57392	6.87373	7.0718	7.01462	6.79742
Barometers are only valid for certain calcic amphiboles
Hidden calculations	•	•	•	•	•	•	•	•	•	•	•	•	•	•	•	•	•	•	•	•	•	•	•	•	•	•	•	•	•	•	•	•	•	•	•	•	•	•	•	•	•	•	•	•	•	•	•	•	•
Part 1. Anion proportions	raw anions	raw anions	raw anions	raw anions	raw anions	raw anions	raw anions	raw anions	raw anions	raw anions	raw anions	raw anions	raw anions	raw anions	raw anions	raw anions	raw anions	raw anions	raw anions	raw anions	raw anions	raw anions	raw anions	raw anions	raw anions	raw anions	raw anions	raw anions	raw anions	raw anions	raw anions	raw anions	raw anions	raw anions	raw anions	raw anions	raw anions	raw anions	raw anions	raw anions	raw anions	raw anions	raw anions	raw anions	raw anions	raw anions	raw anions	raw anions	raw anions
Si	1.53747	1.62916	1.48894	1.47763	1.48768	1.42004	1.44696	1.42552	1.68896	1.81115	1.79464	1.61789	1.64937	1.66904	1.40878	1.45295	1.4817	1.44596	1.47927	1.53897	1.59827	1.58235	1.57443	1.53718	1.69739	1.61269	1.50724	1.49779	1.52194	1.44554	1.4346	1.41381	1.4639	1.40156	1.46966	1.51326	1.54698	1.53309	1.4745	1.48896	1.47323	1.45447	1.45333	1.4495	1.48159	1.48464	1.47006	1.4933	1.49272
Ti	0.00940174	0.00548581	0.0137884	0.0139687	0.0160068	0.0157564	0.0171184	0.0169407	0.00411624	0.00136707	0.00193543	0.00638467	0.00486237	0.00540569	0.0127493	0.0157914	0.0143693	0.0124388	0.012216	0.00849537	0.00855797	0.00737617	0.00759651	0.00763156	0.00329249	0.00590144	0.0108289	0.0128194	0.0100127	0.0155836	0.0132701	0.0132501	0.0111995	0.0122511	0.0135455	0.010546	0.0107438	0.00968217	0.0138435	0.0134128	0.014542	0.0154409	0.017131	0.015158	0.0136432	0.0120032	0.0110893	0.0130948	0.0139436
Al	0.285197	0.209876	0.325168	0.314867	0.332168	0.382561	0.380366	0.385397	0.152277	0.0762003	0.0881668	0.228463	0.218268	0.194776	0.34893	0.353929	0.352358	0.329164	0.312737	0.27802	0.250921	0.235257	0.258857	0.261543	0.151659	0.229663	0.314587	0.318106	0.282584	0.364183	0.346694	0.352732	0.310842	0.307911	0.313246	0.287989	0.285664	0.287277	0.333074	0.351534	0.334842	0.3767	0.360132	0.374481	0.343867	0.357631	0.359843	0.364327	0.358425
Cr	0	0	0	0	0	0	0	0	0	0	0	0	0	0	0	0	0	0	0	0	0	0	0	0	0	0	0	0	0	0	0	0	0	0	0	0	0	0	0	0	0	0	0	0	0	0	0	0	0
Fe3+	0	0	0	0	0	0	0	0	0	0	0	0	0	0	0	0	0	0	0	0	0	0	0	0	0	0	0	0	0	0	0	0	0	0	0	0	0	0	0	0	0	0	0	0	0	0	0	0	0
Fe2+	0.209977	0.182016	0.209887	0.220005	0.21138	0.224876	0.217894	0.215433	0.168246	0.146423	0.153173	0.191264	0.190083	0.183423	0.219979	0.218537	0.228521	0.222721	0.226007	0.213201	0.196356	0.188465	0.197393	0.207777	0.169599	0.198305	0.217237	0.217674	0.21827	0.224874	0.228632	0.22442	0.229536	0.231298	0.23559	0.197594	0.19965	0.210615	0.21259	0.21738	0.212704	0.212605	0.211774	0.213329	0.157699	0.156804	0.159112	0.163543	0.164493
Mn	0.00578256	0.00667772	0.00387243	0.00508195	0.0065875	0.00455331	0.0071542	0.00473375	0.00436864	0.00514256	0.00537375	0.0054541	0.00534133	0.00377657	0.00507772	0.00548653	0.00640283	0.00553869	0.00582767	0.00491419	0.0047549	0.00672988	0.00405851	0.00665375	0.00541604	0.00585587	0.00531595	0.00618151	0.00606732	0.00507772	0.00495789	0.00478732	0.0049015	0.00351437	0.00397675	0.00515525	0.00521305	0.00590098	0.00606873	0.00589393	0.00606873	0.00566274	0.00566415	0.00531595	0.00582062	0.00390062	0.00395701	0.005003	0.0046534
Mg	0.304153	0.356703	0.286812	0.290683	0.287763	0.26012	0.26407	0.263155	0.375959	0.418927	0.415138	0.340645	0.353808	0.367667	0.26937	0.286733	0.276811	0.274166	0.282696	0.314534	0.33739	0.332162	0.335576	0.317457	0.372753	0.328813	0.288589	0.287452	0.298486	0.273645	0.26309	0.265318	0.274494	0.264594	0.270645	0.311212	0.31768	0.319561	0.290254	0.292978	0.291899	0.284721	0.286155	0.283929	0.339772	0.345253	0.32889	0.334651	0.34623
Ni	0	0	0	0	0	0	0	0	0	0	0	0	0	0	0	0	0	0	0	0	0	0	0	0	0	0	0	0	0	0	0	0	0	0	0	0	0	0	0	0	0	0	0	0	0	0	0	0	0
Zn	0	0	0	0	0	0	0	0	0	0	0	0	0	0	0	0	0	0	0	0	0	0	0	0	0	0	0	0	0	0	0	0	0	0	0	0	0	0	0	0	0	0	0	0	0	0	0	0	0
Li	0	0	0	0	0	0	0	0	0	0	0	0	0	0	0	0	0	0	0	0	0	0	0	0	0	0	0	0	0	0	0	0	0	0	0	0	0	0	0	0	0	0	0	0	0	0	0	0	0
Ca	0.218565	0.217254	0.214767	0.21741	0.221104	0.200749	0.199403	0.20083	0.227761	0.23106	0.225971	0.213246	0.216561	0.214808	0.213585	0.212042	0.211707	0.213576	0.219055	0.213353	0.220694	0.219508	0.221718	0.217791	0.230725	0.223344	0.216193	0.214986	0.219496	0.211168	0.215225	0.213674	0.218271	0.215568	0.219492	0.20915	0.210808	0.210043	0.216946	0.212456	0.215305	0.209799	0.21287	0.210594	0.21897	0.217829	0.213367	0.215914	0.217051
Na	0.0165802	0.0150991	0.0203397	0.0209867	0.0195474	0.02665	0.0240039	0.0270324	0.0105668	0.00440322	0.0054778	0.0157816	0.0160768	0.0137615	0.0199637	0.0219612	0.0204107	0.0179275	0.0170352	0.0183535	0.0159365	0.0143859	0.017629	0.017934	0.00965513	0.0145682	0.0188214	0.0185471	0.0162688	0.0217515	0.0217095	0.0197346	0.0180437	0.0168916	0.01952	0.0200347	0.019975	0.0197023	0.0211609	0.0212771	0.0207447	0.0221323	0.0223953	0.0233553	0.0300658	0.0307903	0.0267001	0.0312049	0.0299819
K	0.0109134	0.00628583	0.0113264	0.0120313	0.0133371	0.0150304	0.0160134	0.016437	0.00441314	0.00173362	0.00173362	0.00514565	0.00550979	0.00571786	0.014128	0.0138764	0.0148584	0.0130207	0.0124273	0.00936664	0.00827105	0.00729861	0.00821903	0.008029	0.00376768	0.00650665	0.0125865	0.0121852	0.00978173	0.0165092	0.0138891	0.0156036	0.0129039	0.0126354	0.0125005	0.0124432	0.0115345	0.0102701	0.0135218	0.0131725	0.0125356	0.0148403	0.0143191	0.015351	0.0083167	0.00667544	0.00784428	0.00698437	0.0073931
Ba	0	0	0	0	0	0	0	0	0	0	0	0	0	0	0	0	0	0	0	0	0	0	0	0	0	0	0	0	0	0	0	0	0	0	0	0	0	0	0	0	0	0	0	0	0	0	0	0	0
Sr	0	0	0	0	0	0	0	0	0	0	0	0	0	0	0	0	0	0	0	0	0	0	0	0	0	0	0	0	0	0	0	0	0	0	0	0	0	0	0	0	0	0	0	0	0	0	0	0	0
Pb	0	0	0	0	0	0	0	0	0	0	0	0	0	0	0	0	0	0	0	0	0	0	0	0	0	0	0	0	0	0	0	0	0	0	0	0	0	0	0	0	0	0	0	0	0	0	0	0	0
F	0	0	0	0	0	0	0	0	0	0	0	0	0	0	0	0	0	0	0	0	0	0	0	0	0	0	0	0	0	0	0	0	0	0	0	0	0	0	0	0	0	0	0	0	0	0	0	0	0
Cl	0	0	0	0	0	0	0	0	0	0	0	0	0	0	0	0	0	0	0	0	0	0	0	0	0	0	0	0	0	0	0	0	0	0	0	0	0	0	0	0	0	0	0	0	0	0	0	0	0
Total-F-Cl	2.59804	2.62856	2.5749	2.57266	2.59558	2.55034	2.57298	2.55548	2.63667	2.69641	2.6916	2.62427	2.65988	2.65838	2.51256	2.58131	2.60714	2.53451	2.56727	2.59921	2.64115	2.59353	2.62548	2.582	2.64426	2.62564	2.5914	2.58574	2.5829	2.57833	2.54207	2.52333	2.54409	2.46623	2.55817	2.56738	2.60825	2.60614	2.58196	2.61706	2.58187	2.59637	2.58377	2.59101	2.59974	2.61553	2.58086	2.62802	2.63489
Part 2. Cation proportions	raw cations	raw cations	raw cations	raw cations	raw cations	raw cations	raw cations	raw cations	raw cations	raw cations	raw cations	raw cations	raw cations	raw cations	raw cations	raw cations	raw cations	raw cations	raw cations	raw cations	raw cations	raw cations	raw cations	raw cations	raw cations	raw cations	raw cations	raw cations	raw cations	raw cations	raw cations	raw cations	raw cations	raw cations	raw cations	raw cations	raw cations	raw cations	raw cations	raw cations	raw cations	raw cations	raw cations	raw cations	raw cations	raw cations	raw cations	raw cations	raw cations
Si	0.768735	0.814581	0.744469	0.738814	0.743842	0.710021	0.723479	0.712762	0.84448	0.905576	0.897318	0.808943	0.824686	0.834521	0.70439	0.726474	0.740852	0.722979	0.739636	0.769484	0.799134	0.791173	0.787214	0.76859	0.848696	0.806344	0.753621	0.748896	0.760969	0.722768	0.717302	0.706905	0.731948	0.700782	0.734828	0.75663	0.77349	0.766546	0.737252	0.744479	0.736615	0.727237	0.726667	0.724748	0.740793	0.742322	0.735031	0.746651	0.74636
Ti	0.00470087	0.00274291	0.00689419	0.00698433	0.00800338	0.00787819	0.00855922	0.00847033	0.00205812	0.000683536	0.000967716	0.00319234	0.00243118	0.00270284	0.00637466	0.00789571	0.00718463	0.00621942	0.006108	0.00424769	0.00427898	0.00368809	0.00379825	0.00381578	0.00164624	0.00295072	0.00541445	0.00640971	0.00500633	0.0077918	0.00663505	0.00662504	0.00559973	0.00612553	0.00677276	0.00527299	0.00537189	0.00484108	0.00692174	0.00670641	0.00727102	0.00772045	0.00856548	0.00757898	0.00682158	0.00600159	0.00554465	0.00654742	0.00697181
Al	0.190131	0.139917	0.216779	0.209911	0.221445	0.255041	0.253577	0.256932	0.101518	0.0508002	0.0587778	0.152308	0.145512	0.129851	0.23262	0.235953	0.234905	0.219442	0.208491	0.185347	0.167281	0.156838	0.172571	0.174362	0.101106	0.153109	0.209725	0.212071	0.188389	0.242789	0.231129	0.235155	0.207228	0.205274	0.208831	0.191993	0.190443	0.191518	0.222049	0.234356	0.223228	0.251133	0.240088	0.249654	0.229244	0.23842	0.239896	0.242885	0.23895
Cr	0	0	0	0	0	0	0	0	0	0	0	0	0	0	0	0	0	0	0	0	0	0	0	0	0	0	0	0	0	0	0	0	0	0	0	0	0	0	0	0	0	0	0	0	0	0	0	0	0
Fe3+	0	0	0	0	0	0	0	0	0	0	0	0	0	0	0	0	0	0	0	0	0	0	0	0	0	0	0	0	0	0	0	0	0	0	0	0	0	0	0	0	0	0	0	0	0	0	0	0	0
Fe2+	0.209977	0.182016	0.209887	0.220005	0.21138	0.224876	0.217894	0.215433	0.168246	0.146423	0.153173	0.191264	0.190083	0.183423	0.219979	0.218537	0.228521	0.222721	0.226007	0.213201	0.196356	0.188465	0.197393	0.207777	0.169599	0.198305	0.217237	0.217674	0.21827	0.224874	0.228632	0.22442	0.229536	0.231298	0.23559	0.197594	0.19965	0.210615	0.21259	0.21738	0.212704	0.212605	0.211774	0.213329	0.157699	0.156804	0.159112	0.163543	0.164493
Mn	0.00578256	0.00667772	0.00387243	0.00508195	0.0065875	0.00455331	0.0071542	0.00473375	0.00436864	0.00514256	0.00537375	0.0054541	0.00534133	0.00377657	0.00507772	0.00548653	0.00640283	0.00553869	0.00582767	0.00491419	0.0047549	0.00672988	0.00405851	0.00665375	0.00541604	0.00585587	0.00531595	0.00618151	0.00606732	0.00507772	0.00495789	0.00478732	0.0049015	0.00351437	0.00397675	0.00515525	0.00521305	0.00590098	0.00606873	0.00589393	0.00606873	0.00566274	0.00566415	0.00531595	0.00582062	0.00390062	0.00395701	0.005003	0.0046534
Mg	0.304153	0.356703	0.286812	0.290683	0.287763	0.26012	0.26407	0.263155	0.375959	0.418927	0.415138	0.340645	0.353808	0.367667	0.26937	0.286733	0.276811	0.274166	0.282696	0.314534	0.33739	0.332162	0.335576	0.317457	0.372753	0.328813	0.288589	0.287452	0.298486	0.273645	0.26309	0.265318	0.274494	0.264594	0.270645	0.311212	0.31768	0.319561	0.290254	0.292978	0.291899	0.284721	0.286155	0.283929	0.339772	0.345253	0.32889	0.334651	0.34623
Ni	0	0	0	0	0	0	0	0	0	0	0	0	0	0	0	0	0	0	0	0	0	0	0	0	0	0	0	0	0	0	0	0	0	0	0	0	0	0	0	0	0	0	0	0	0	0	0	0	0
Zn	0	0	0	0	0	0	0	0	0	0	0	0	0	0	0	0	0	0	0	0	0	0	0	0	0	0	0	0	0	0	0	0	0	0	0	0	0	0	0	0	0	0	0	0	0	0	0	0	0
Li	0	0	0	0	0	0	0	0	0	0	0	0	0	0	0	0	0	0	0	0	0	0	0	0	0	0	0	0	0	0	0	0	0	0	0	0	0	0	0	0	0	0	0	0	0	0	0	0	0
Ca	0.218565	0.217254	0.214767	0.21741	0.221104	0.200749	0.199403	0.20083	0.227761	0.23106	0.225971	0.213246	0.216561	0.214808	0.213585	0.212042	0.211707	0.213576	0.219055	0.213353	0.220694	0.219508	0.221718	0.217791	0.230725	0.223344	0.216193	0.214986	0.219496	0.211168	0.215225	0.213674	0.218271	0.215568	0.219492	0.20915	0.210808	0.210043	0.216946	0.212456	0.215305	0.209799	0.21287	0.210594	0.21897	0.217829	0.213367	0.215914	0.217051
Na	0.0331605	0.0301981	0.0406793	0.0419734	0.0390949	0.0533001	0.0480078	0.0540649	0.0211335	0.00880644	0.0109556	0.0315631	0.0321537	0.0275229	0.0399275	0.0439225	0.0408213	0.035855	0.0340705	0.0367069	0.0318729	0.0287718	0.035258	0.0358679	0.0193103	0.0291364	0.0376428	0.0370942	0.0325377	0.043503	0.0434191	0.0394692	0.0360873	0.0337833	0.03904	0.0400694	0.03995	0.0394047	0.0423219	0.0425542	0.0414893	0.0442645	0.0447905	0.0467106	0.0601316	0.0615805	0.0534001	0.0624098	0.0599638
K	0.0218268	0.0125717	0.0226528	0.0240626	0.0266742	0.0300607	0.0320268	0.032874	0.00882628	0.00346724	0.00346724	0.0102913	0.0110196	0.0114357	0.028256	0.0277528	0.0297168	0.0260414	0.0248546	0.0187333	0.0165421	0.0145972	0.0164381	0.016058	0.00753535	0.0130133	0.025173	0.0243705	0.0195635	0.0330184	0.0277782	0.0312073	0.0258079	0.0252707	0.0250011	0.0248864	0.0230689	0.0205402	0.0270436	0.0263451	0.0250711	0.0296807	0.0286382	0.0307019	0.0166334	0.0133509	0.0156886	0.0139687	0.0147862
Ba	0	0	0	0	0	0	0	0	0	0	0	0	0	0	0	0	0	0	0	0	0	0	0	0	0	0	0	0	0	0	0	0	0	0	0	0	0	0	0	0	0	0	0	0	0	0	0	0	0
Sr	0	0	0	0	0	0	0	0	0	0	0	0	0	0	0	0	0	0	0	0	0	0	0	0	0	0	0	0	0	0	0	0	0	0	0	0	0	0	0	0	0	0	0	0	0	0	0	0	0
Pb	0	0	0	0	0	0	0	0	0	0	0	0	0	0	0	0	0	0	0	0	0	0	0	0	0	0	0	0	0	0	0	0	0	0	0	0	0	0	0	0	0	0	0	0	0	0	0	0	0
F	0	0	0	0	0	0	0	0	0	0	0	0	0	0	0	0	0	0	0	0	0	0	0	0	0	0	0	0	0	0	0	0	0	0	0	0	0	0	0	0	0	0	0	0	0	0	0	0	0
Cl	0	0	0	0	0	0	0	0	0	0	0	0	0	0	0	0	0	0	0	0	0	0	0	0	0	0	0	0	0	0	0	0	0	0	0	0	0	0	0	0	0	0	0	0	0	0	0	0	0
Total	1.75703	1.76266	1.74681	1.75493	1.76589	1.7466	1.75417	1.74925	1.75435	1.77089	1.77114	1.75691	1.7816	1.77571	1.71958	1.7648	1.77692	1.72654	1.74675	1.76052	1.7783	1.74193	1.77403	1.74837	1.75679	1.76087	1.75891	1.75514	1.74878	1.76464	1.73817	1.72756	1.73387	1.68621	1.74418	1.74196	1.76567	1.76897	1.76145	1.78315	1.75965	1.77282	1.76521	1.77256	1.77588	1.78546	1.75488	1.79157	1.79946
Si to Ca sum (Sum FM+Ca+Sr)	1.70204	1.71989	1.68348	1.68889	1.70012	1.66324	1.67414	1.66232	1.72439	1.75861	1.75672	1.71505	1.73842	1.73675	1.6514	1.69312	1.70638	1.66464	1.68782	1.70508	1.72989	1.69856	1.72233	1.69645	1.72994	1.71872	1.6961	1.69367	1.69668	1.68811	1.66697	1.65688	1.67198	1.62716	1.68014	1.67701	1.70266	1.70902	1.69208	1.71425	1.69309	1.69888	1.69178	1.69515	1.69912	1.71053	1.6858	1.71519	1.72471
Si to Li sum (Sum FM)	1.48348	1.50264	1.46871	1.47148	1.47902	1.46249	1.47473	1.46149	1.49663	1.52755	1.53075	1.50181	1.52186	1.52194	1.43781	1.48108	1.49468	1.45107	1.46877	1.49173	1.5092	1.47906	1.50061	1.47866	1.49922	1.49538	1.4799	1.47868	1.47719	1.47695	1.45175	1.44321	1.45371	1.41159	1.46064	1.46786	1.49185	1.49898	1.47514	1.50179	1.47779	1.48908	1.47891	1.48456	1.48015	1.4927	1.47243	1.49928	1.50766
Part 3a. ∑13 normalized based on anions
Si	13.4731	14.0946	13.179	13.0543	13.0761	12.6227	12.7551	12.6801	14.6706	15.4135	15.2411	14.0048	14.0892	14.2565	12.7375	12.7531	12.8872	12.9542	13.093	13.4117	13.7673	13.9079	13.6395	13.5145	14.7184	14.0198	13.2402	13.168	13.3938	12.7235	12.8465	12.7352	13.0911	12.9077	13.0802	13.4021	13.4804	13.2958	12.9944	12.8889	12.9599	12.6979	12.7752	12.693	13.0126	12.9298	12.9791	12.9482	12.8712
Ti	0.0823892	0.0474602	0.122045	0.123408	0.140693	0.140058	0.150902	0.150688	0.0357544	0.0116342	0.0164368	0.0552672	0.0415352	0.0461739	0.115273	0.138607	0.124977	0.111439	0.108123	0.0740349	0.0737171	0.0648321	0.0658096	0.067095	0.0285498	0.0513039	0.095125	0.112703	0.0881166	0.137166	0.11883	0.119353	0.100153	0.112826	0.120558	0.0933999	0.0936216	0.0839691	0.121999	0.116106	0.127925	0.134803	0.150585	0.132736	0.119827	0.104536	0.0979069	0.113543	0.120231
Al	2.49923	1.81573	2.87816	2.78174	2.91962	3.40057	3.35298	3.42813	1.32271	0.648491	0.748763	1.97763	1.86448	1.66372	3.15486	3.10657	3.06465	2.94895	2.76802	2.42287	2.1614	2.06776	2.24251	2.29943	1.31507	1.99657	2.76345	2.79666	2.48688	3.20552	3.10455	3.1773	2.77975	2.83571	2.78795	2.55056	2.48929	2.49142	2.9353	3.04299	2.94559	3.28868	3.16564	3.27927	3.02014	3.11462	3.17704	3.15902	3.09057
Cr	0	0	0	0	0	0	0	0	0	0	0	0	0	0	0	0	0	0	0	0	0	0	0	0	0	0	0	0	0	0	0	0	0	0	0	0	0	0	0	0	0	0	0	0	0	0	0	0	0
Fe3+	0	0	0	0	0	0	0	0	0	0	0	0	0	0	0	0	0	0	0	0	0	0	0	0	0	0	0	0	0	0	0	0	0	0	0	0	0	0	0	0	0	0	0	0	0	0	0	0	0
Fe2+	1.84007	1.5747	1.85777	1.94367	1.85795	1.99891	1.92077	1.91629	1.46142	1.24611	1.30083	1.65562	1.62372	1.56675	1.98894	1.91818	1.98757	1.99534	2.00038	1.85799	1.69139	1.65649	1.71004	1.82672	1.47063	1.72396	1.90829	1.9137	1.92088	1.97933	2.04734	2.02151	2.05266	2.13013	2.0968	1.74998	1.73975	1.82657	1.8735	1.88171	1.87114	1.85609	1.86154	1.86808	1.38505	1.36561	1.40479	1.41806	1.41836
Mn	0.0506737	0.057772	0.034276	0.0448972	0.0579015	0.0404742	0.0630653	0.042107	0.0379468	0.043765	0.045637	0.047212	0.0456265	0.0322584	0.0459103	0.0481573	0.0556888	0.0496207	0.0515805	0.0428259	0.040958	0.0591515	0.0351594	0.0584983	0.0469636	0.0509078	0.0466973	0.0543453	0.0533955	0.0446938	0.0443966	0.0431227	0.0438325	0.0323655	0.0353938	0.0456572	0.0454266	0.0511766	0.0534822	0.0510197	0.0533863	0.049437	0.0497892	0.0465509	0.0511219	0.0339707	0.0349362	0.0433802	0.0401246
Mg	2.66535	3.086	2.53866	2.56808	2.52932	2.3122	2.32782	2.34078	3.26565	3.56521	3.5256	2.94871	3.02228	3.14051	2.43551	2.51676	2.40757	2.45623	2.50213	2.74108	2.90623	2.9195	2.90714	2.79101	3.23222	2.85852	2.53507	2.52717	2.62683	2.40861	2.3559	2.38991	2.4547	2.43677	2.4088	2.75623	2.76827	2.77141	2.55793	2.53611	2.56782	2.48568	2.51537	2.48632	2.98418	3.00682	2.90375	2.9017	2.98542
Ni	0	0	0	0	0	0	0	0	0	0	0	0	0	0	0	0	0	0	0	0	0	0	0	0	0	0	0	0	0	0	0	0	0	0	0	0	0	0	0	0	0	0	0	0	0	0	0	0	0
Zn	0	0	0	0	0	0	0	0	0	0	0	0	0	0	0	0	0	0	0	0	0	0	0	0	0	0	0	0	0	0	0	0	0	0	0	0	0	0	0	0	0	0	0	0	0	0	0	0	0
Li	0	0	0	0	0	0	0	0	0	0	0	0	0	0	0	0	0	0	0	0	0	0	0	0	0	0	0	0	0	0	0	0	0	0	0	0	0	0	0	0	0	0	0	0	0	0	0	0	0
Ca	1.91533	1.87957	1.90096	1.92074	1.94342	1.78445	1.75777	1.78639	1.97837	1.9664	1.91907	1.84591	1.8499	1.83483	1.93113	1.86118	1.84133	1.91341	1.93885	1.85931	1.90103	1.92935	1.92077	1.91477	2.00066	1.94163	1.89912	1.89007	1.93168	1.85869	1.92728	1.92471	1.95192	1.98527	1.95352	1.85233	1.83699	1.82161	1.91189	1.83909	1.89403	1.83159	1.87117	1.84414	1.92319	1.89708	1.88381	1.87215	1.87156
Na	0.145296	0.130629	0.180032	0.18541	0.171814	0.236891	0.211598	0.240455	0.0917847	0.0374729	0.0465207	0.136609	0.137331	0.117547	0.180502	0.192762	0.177522	0.160611	0.150778	0.159945	0.137274	0.126443	0.152722	0.157671	0.0837215	0.126648	0.165334	0.163058	0.143174	0.191455	0.194403	0.177763	0.161358	0.155563	0.173732	0.177437	0.174063	0.17087	0.186486	0.184181	0.18249	0.19322	0.19686	0.204518	0.264065	0.268154	0.235733	0.270572	0.258523
K	0.0956362	0.0543816	0.100253	0.106292	0.117228	0.133604	0.141161	0.146208	0.0383333	0.0147537	0.0147229	0.044542	0.0470656	0.0488404	0.127738	0.121798	0.129231	0.116652	0.109993	0.0816277	0.0712457	0.0641503	0.0712026	0.0705892	0.0326702	0.0565653	0.110565	0.107128	0.0860842	0.145313	0.124373	0.140553	0.115396	0.116365	0.111257	0.110203	0.100512	0.0890678	0.119164	0.114026	0.110275	0.12956	0.125868	0.134426	0.0730447	0.0581367	0.0692568	0.0605603	0.063748
Ba	0	0	0	0	0	0	0	0	0	0	0	0	0	0	0	0	0	0	0	0	0	0	0	0	0	0	0	0	0	0	0	0	0	0	0	0	0	0	0	0	0	0	0	0	0	0	0	0	0
Sr	0	0	0	0	0	0	0	0	0	0	0	0	0	0	0	0	0	0	0	0	0	0	0	0	0	0	0	0	0	0	0	0	0	0	0	0	0	0	0	0	0	0	0	0	0	0	0	0	0
Pb	0	0	0	0	0	0	0	0	0	0	0	0	0	0	0	0	0	0	0	0	0	0	0	0	0	0	0	0	0	0	0	0	0	0	0	0	0	0	0	0	0	0	0	0	0	0	0	0	0
F	0	0	0	0	0	0	0	0	0	0	0	0	0	0	0	0	0	0	0	0	0	0	0	0	0	0	0	0	0	0	0	0	0	0	0	0	0	0	0	0	0	0	0	0	0	0	0	0	0
Cl	0	0	0	0	0	0	0	0	0	0	0	0	0	0	0	0	0	0	0	0	0	0	0	0	0	0	0	0	0	0	0	0	0	0	0	0	0	0	0	0	0	0	0	0	0	0	0	0	0
Total exc. F,Cl	22.7671	22.7409	22.7912	22.7285	22.8141	22.6698	22.6812	22.7312	22.9026	22.9474	22.8587	22.7163	22.7212	22.7071	22.7174	22.6571	22.6757	22.7065	22.7229	22.6514	22.7505	22.7955	22.7448	22.7003	22.9289	22.8259	22.7638	22.7328	22.7309	22.6943	22.7636	22.7294	22.7509	22.7127	22.7682	22.7379	22.7284	22.6019	22.7542	22.6541	22.7126	22.6669	22.712	22.689	22.8332	22.7788	22.7863	22.7871	22.7197
Part 3b. ∑15 normalized based on anions
Si	13.5496	14.2087	13.2666	13.1237	13.1257	12.8067	12.9645	12.8633	14.6918	15.4481	15.3238	14.1502	14.2316	14.4152	12.7963	12.8722	13.025	13.0294	13.1466	13.5387	13.8587	13.9737	13.7119	13.5918	14.7178	14.0746	13.3298	13.2652	13.4551	12.8445	12.9091	12.7994	13.1332	12.9204	13.1209	13.5354	13.6285	13.4559	13.0712	13.0287	13.0521	12.8421	12.8858	12.8263	13.0796	13.0192	13.0804	13.0595	12.9824
Ti	0.0828569	0.0478444	0.122856	0.124064	0.141226	0.1421	0.153378	0.152865	0.035806	0.0116604	0.016526	0.0558409	0.041955	0.046688	0.115805	0.139902	0.126313	0.112086	0.108566	0.0747358	0.0742068	0.0651389	0.066159	0.0674784	0.0285485	0.0515044	0.0957691	0.113535	0.0885198	0.138471	0.119409	0.119955	0.100475	0.112937	0.120932	0.0943286	0.0946502	0.0849798	0.12272	0.117365	0.128836	0.136333	0.15189	0.134129	0.120443	0.105258	0.0986712	0.114519	0.121269
Al	2.51342	1.83043	2.89728	2.79652	2.93068	3.45015	3.40802	3.47766	1.32462	0.649947	0.752825	1.99815	1.88332	1.68225	3.16941	3.13559	3.09741	2.96608	2.77935	2.44581	2.17576	2.07755	2.25442	2.31257	1.31501	2.00437	2.78216	2.81731	2.49826	3.23601	3.11967	3.19333	2.78869	2.83849	2.79661	2.57592	2.51664	2.52141	2.95264	3.07599	2.96655	3.32602	3.19307	3.3137	3.03569	3.13614	3.20184	3.18618	3.11727
Cr	0	0	0	0	0	0	0	0	0	0	0	0	0	0	0	0	0	0	0	0	0	0	0	0	0	0	0	0	0	0	0	0	0	0	0	0	0	0	0	0	0	0	0	0	0	0	0	0	0
Fe3+	0	0	0	0	0	0	0	0	0	0	0	0	0	0	0	0	0	0	0	0	0	0	0	0	0	0	0	0	0	0	0	0	0	0	0	0	0	0	0	0	0	0	0	0	0	0	0	0	0
Fe2+	1.85051	1.58745	1.87011	1.954	1.86498	2.02805	1.9523	1.94397	1.46353	1.24891	1.30789	1.67281	1.64014	1.58419	1.99812	1.9361	2.00882	2.00693	2.00857	1.87558	1.70262	1.66433	1.71913	1.83716	1.47056	1.73069	1.92121	1.92783	1.92967	1.99815	2.05731	2.03171	2.05926	2.13223	2.10331	1.76738	1.75887	1.84855	1.88457	1.90212	1.88446	1.87717	1.87767	1.8877	1.39218	1.37505	1.41576	1.43025	1.43061
Mn	0.0509613	0.0582396	0.0345038	0.0451357	0.0581207	0.0410643	0.0641005	0.0427153	0.0380016	0.0438632	0.0458846	0.0477021	0.0460877	0.0326176	0.046122	0.0486072	0.0562842	0.0499088	0.0517917	0.0432313	0.0412301	0.0594315	0.0353461	0.0588326	0.0469615	0.0511066	0.0470134	0.0547465	0.0536398	0.0451188	0.0446129	0.0433402	0.0439734	0.0323973	0.0355038	0.0461112	0.0459257	0.0517925	0.0537982	0.051573	0.0537661	0.0499984	0.0502205	0.0470397	0.0513851	0.0342054	0.035209	0.0437531	0.0404712
Mg	2.68048	3.11098	2.55553	2.58172	2.5389	2.34591	2.36603	2.37459	3.27036	3.57322	3.54472	2.97931	3.05283	3.17548	2.44675	2.54027	2.43331	2.4705	2.51238	2.76703	2.92553	2.93332	2.92258	2.80696	3.23207	2.86969	2.55223	2.54582	2.63885	2.43152	2.36738	2.40196	2.4626	2.43917	2.41628	2.78364	2.79869	2.80476	2.57305	2.56361	2.58609	2.5139	2.53716	2.51243	2.99954	3.02759	2.92642	2.92664	3.01121
Ni	0	0	0	0	0	0	0	0	0	0	0	0	0	0	0	0	0	0	0	0	0	0	0	0	0	0	0	0	0	0	0	0	0	0	0	0	0	0	0	0	0	0	0	0	0	0	0	0	0
Zn	0	0	0	0	0	0	0	0	0	0	0	0	0	0	0	0	0	0	0	0	0	0	0	0	0	0	0	0	0	0	0	0	0	0	0	0	0	0	0	0	0	0	0	0	0	0	0	0	0
Li	0	0	0	0	0	0	0	0	0	0	0	0	0	0	0	0	0	0	0	0	0	0	0	0	0	0	0	0	0	0	0	0	0	0	0	0	0	0	0	0	0	0	0	0	0	0	0	0	0
Ca	1.9262	1.89478	1.9136	1.93094	1.95078	1.81047	1.78662	1.8122	1.98123	1.97081	1.92948	1.86507	1.8686	1.85526	1.94004	1.87856	1.86101	1.92452	1.94679	1.87692	1.91366	1.93848	1.93097	1.92571	2.00057	1.94922	1.91198	1.90403	1.94051	1.87637	1.93667	1.93442	1.9582	1.98722	1.9596	1.87074	1.85717	1.84354	1.92319	1.85903	1.90751	1.85239	1.88738	1.8635	1.93309	1.91019	1.89851	1.88824	1.88772
Na	0.14612	0.131686	0.181229	0.186395	0.172465	0.240345	0.215071	0.243929	0.0919173	0.037557	0.046773	0.138027	0.138719	0.118855	0.181335	0.194563	0.17942	0.161544	0.151396	0.16146	0.138186	0.127042	0.153533	0.158572	0.0837178	0.127143	0.166453	0.164262	0.143829	0.193276	0.19535	0.17866	0.161877	0.155716	0.174272	0.179201	0.175975	0.172926	0.187588	0.186179	0.183788	0.195414	0.198565	0.206666	0.265424	0.270006	0.237574	0.272898	0.260756
K	0.0961792	0.0548217	0.100919	0.106857	0.117672	0.135552	0.143478	0.14832	0.0383887	0.0147868	0.0148028	0.0450043	0.0475413	0.0493842	0.128328	0.122936	0.130613	0.117329	0.110444	0.0824006	0.0717189	0.0644539	0.0715807	0.0709926	0.0326688	0.0567862	0.111313	0.107919	0.0864781	0.146695	0.124979	0.141262	0.115767	0.11648	0.111603	0.111298	0.101616	0.0901398	0.119868	0.115262	0.111059	0.131031	0.126958	0.135837	0.0734207	0.0585384	0.0697974	0.0610809	0.0642986
Ba	0	0	0	0	0	0	0	0	0	0	0	0	0	0	0	0	0	0	0	0	0	0	0	0	0	0	0	0	0	0	0	0	0	0	0	0	0	0	0	0	0	0	0	0	0	0	0	0	0
Sr	0	0	0	0	0	0	0	0	0	0	0	0	0	0	0	0	0	0	0	0	0	0	0	0	0	0	0	0	0	0	0	0	0	0	0	0	0	0	0	0	0	0	0	0	0	0	0	0	0
Pb	0	0	0	0	0	0	0	0	0	0	0	0	0	0	0	0	0	0	0	0	0	0	0	0	0	0	0	0	0	0	0	0	0	0	0	0	0	0	0	0	0	0	0	0	0	0	0	0	0
F	0	0	0	0	0	0	0	0	0	0	0	0	0	0	0	0	0	0	0	0	0	0	0	0	0	0	0	0	0	0	0	0	0	0	0	0	0	0	0	0	0	0	0	0	0	0	0	0	0
Cl	0	0	0	0	0	0	0	0	0	0	0	0	0	0	0	0	0	0	0	0	0	0	0	0	0	0	0	0	0	0	0	0	0	0	0	0	0	0	0	0	0	0	0	0	0	0	0	0	0
Total exc. F,Cl	22.8963	22.9249	22.9426	22.8493	22.9005	23.0004	23.0535	23.0595	22.9356	22.9989	22.9827	22.9521	22.9508	22.9599	22.8222	22.8688	22.9181	22.8383	22.8159	22.8658	22.9016	22.9034	22.8656	22.83	22.9279	22.9151	22.9179	22.9007	22.8349	22.9101	22.8745	22.844	22.8241	22.735	22.839	22.964	22.9781	22.874	22.8886	22.8998	22.8742	22.9243	22.9087	22.9273	22.9508	22.9361	22.9642	22.983	22.916
Part 4. Iron oxidation state calculations
∑13 Fe3+	0.465815	0.518284	0.417674	0.54291	0.371827	0.660317	0.637579	0.537666	0.194847	0.10526	0.282667	0.567385	0.557664	0.585753	0.565235	0.685787	0.648589	0.587014	0.554293	0.697257	0.498987	0.408918	0.510309	0.59935	0.142228	0.348123	0.472371	0.534354	0.53827	0.61136	0.472859	0.541231	0.498201	0.574625	0.463577	0.524179	0.543299	0.796152	0.491612	0.691761	0.574831	0.666116	0.576028	0.621924	0.333542	0.442481	0.427379	0.425721	0.560541
∑13 Fe3+ = 0 if Fe3+ < 0	0.465815	0.518284	0.417674	0.54291	0.371827	0.660317	0.637579	0.537666	0.194847	0.10526	0.282667	0.567385	0.557664	0.585753	0.565235	0.685787	0.648589	0.587014	0.554293	0.697257	0.498987	0.408918	0.510309	0.59935	0.142228	0.348123	0.472371	0.534354	0.53827	0.61136	0.472859	0.541231	0.498201	0.574625	0.463577	0.524179	0.543299	0.796152	0.491612	0.691761	0.574831	0.666116	0.576028	0.621924	0.333542	0.442481	0.427379	0.425721	0.560541
∑15 Fe3+	0.207317	0.150162	0.114718	0.301428	0.199064	-0.00070822	-0.106995	-0.119099	0.128709	0.00222221	0.0346817	0.0958169	0.0983394	0.0801129	0.355664	0.262488	0.163727	0.323336	0.368277	0.268332	0.196778	0.193153	0.26876	0.339912	0.144239	0.169791	0.164115	0.198698	0.330244	0.179715	0.251077	0.311901	0.351889	0.529964	0.322047	0.0720202	0.043876	0.252093	0.222717	0.200439	0.251636	0.151368	0.182529	0.145459	0.0984935	0.127734	0.0716093	0.0339316	0.168084
∑15 Fe3+ = 0 if Fe3+ < 0	0.207317	0.150162	0.114718	0.301428	0.199064	0	0	0	0.128709	0.00222221	0.0346817	0.0958169	0.0983394	0.0801129	0.355664	0.262488	0.163727	0.323336	0.368277	0.268332	0.196778	0.193153	0.26876	0.339912	0.144239	0.169791	0.164115	0.198698	0.330244	0.179715	0.251077	0.311901	0.351889	0.529964	0.322047	0.0720202	0.043876	0.252093	0.222717	0.200439	0.251636	0.151368	0.182529	0.145459	0.0984935	0.127734	0.0716093	0.0339316	0.168084
∑13 Fe3+ = total Fe2+ if Fe3+ > total Fe2+	0.465815	0.518284	0.417674	0.54291	0.371827	0.660317	0.637579	0.537666	0.194847	0.10526	0.282667	0.567385	0.557664	0.585753	0.565235	0.685787	0.648589	0.587014	0.554293	0.697257	0.498987	0.408918	0.510309	0.59935	0.142228	0.348123	0.472371	0.534354	0.53827	0.61136	0.472859	0.541231	0.498201	0.574625	0.463577	0.524179	0.543299	0.796152	0.491612	0.691761	0.574831	0.666116	0.576028	0.621924	0.333542	0.442481	0.427379	0.425721	0.560541
∑13 Fe2+ = total Fe2+ - Fe3+	1.37425	1.05642	1.44009	1.40076	1.48612	1.33859	1.28319	1.37862	1.26657	1.14085	1.01816	1.08824	1.06606	0.980998	1.42371	1.2324	1.33898	1.40833	1.44609	1.16073	1.1924	1.24757	1.19974	1.22738	1.3284	1.37583	1.43592	1.37935	1.38261	1.36797	1.57448	1.48028	1.55446	1.55551	1.63322	1.2258	1.19645	1.03041	1.38189	1.18995	1.29631	1.18997	1.28552	1.24616	1.05151	0.923131	0.977409	0.992335	0.85782
∑15 Fe3+ = total Fe2+ if Fe3+ > total Fe2+	0.207317	0.150162	0.114718	0.301428	0.199064	0	0	0	0.128709	0.00222221	0.0346817	0.0958169	0.0983394	0.0801129	0.355664	0.262488	0.163727	0.323336	0.368277	0.268332	0.196778	0.193153	0.26876	0.339912	0.144239	0.169791	0.164115	0.198698	0.330244	0.179715	0.251077	0.311901	0.351889	0.529964	0.322047	0.0720202	0.043876	0.252093	0.222717	0.200439	0.251636	0.151368	0.182529	0.145459	0.0984935	0.127734	0.0716093	0.0339316	0.168084
∑15 Fe2+ = total Fe2+ - Fe3+	1.6432	1.43729	1.7554	1.65257	1.66592	2.02805	1.9523	1.94397	1.33482	1.24669	1.27321	1.57699	1.5418	1.50408	1.64245	1.67361	1.84509	1.68359	1.64029	1.60725	1.50584	1.47117	1.45037	1.49725	1.32632	1.5609	1.75709	1.72913	1.59943	1.81844	1.80624	1.71981	1.70737	1.60226	1.78127	1.69536	1.71499	1.59646	1.66185	1.70168	1.63282	1.7258	1.69514	1.74224	1.29369	1.24731	1.34415	1.39631	1.26253
Part 5a. Cations based on 23 O. ∑13 (Fe2+ - Fe3+)
Si	6.80548	7.12761	6.64989	6.60511	6.59135	6.40326	6.46721	6.41504	7.36651	7.72444	7.66766	7.08986	7.13106	7.22019	6.44799	6.47305	6.53574	6.56084	6.62634	6.80905	6.95912	7.0163	6.89625	6.84648	7.38203	7.06337	6.68877	6.66137	6.77621	6.44746	6.48996	6.4434	6.61723	6.53548	6.60669	6.7783	6.82077	6.765	6.56741	6.54284	6.56196	6.44223	6.46858	6.43348	6.55382	6.52771	6.55041	6.53456	6.51499
Ti	0.041616	0.0240005	0.0615816	0.062441	0.0709197	0.0710487	0.0765113	0.0762352	0.0179532	0.00583046	0.00826922	0.0279787	0.0210224	0.0233847	0.0583536	0.0703525	0.0633823	0.0564396	0.0547211	0.0375872	0.0372628	0.0327068	0.0332739	0.0339904	0.0143192	0.0258476	0.048056	0.0570139	0.0445799	0.0695069	0.0600322	0.0603868	0.0506248	0.0571266	0.0608925	0.0472383	0.0473703	0.042724	0.0616585	0.0589391	0.0647721	0.0683916	0.0762474	0.0672774	0.0603509	0.0527758	0.0494125	0.0573018	0.0608571
Al	1.6832	1.22428	1.93635	1.87664	1.96228	2.30006	2.26674	2.31245	0.885555	0.433319	0.502262	1.33488	1.25824	1.12345	2.1294	2.10239	2.07232	1.99138	1.86786	1.64011	1.45674	1.39087	1.51178	1.55319	0.87943	1.3412	1.86141	1.88635	1.67755	2.1658	2.0912	2.14342	1.87346	1.91438	1.87755	1.71997	1.67936	1.6902	1.978	2.05963	1.98858	2.22467	2.13719	2.21614	2.02813	2.09658	2.13789	2.12569	2.0858
Cr	0	0	0	0	0	0	0	0	0	0	0	0	0	0	0	0	0	0	0	0	0	0	0	0	0	0	0	0	0	0	0	0	0	0	0	0	0	0	0	0	0	0	0	0	0	0	0	0	0
Fe3+	0.47058	0.52419	0.421501	0.549394	0.374858	0.669934	0.64654	0.544025	0.195676	0.105501	0.284414	0.57447	0.564507	0.593308	0.572267	0.696166	0.657865	0.594602	0.561054	0.707988	0.50446	0.412586	0.516034	0.607262	0.142669	0.350778	0.477272	0.540634	0.544643	0.619595	0.47777	0.547675	0.503656	0.581894	0.468296	0.530221	0.549793	0.810174	0.496923	0.702322	0.582105	0.675904	0.583332	0.630448	0.335978	0.446779	0.431387	0.429697	0.567456
Fe2+	1.38831	1.06846	1.45329	1.41749	1.49823	1.35809	1.30122	1.39493	1.27196	1.14347	1.02446	1.10183	1.07914	0.993651	1.44142	1.25105	1.35813	1.42653	1.46373	1.17859	1.20548	1.25876	1.21319	1.24358	1.33252	1.38633	1.45082	1.39556	1.39899	1.3864	1.59083	1.4979	1.57148	1.57518	1.64985	1.23993	1.21075	1.04856	1.39682	1.20812	1.31272	1.20746	1.30182	1.26324	1.05919	0.932097	0.986575	1.0016	0.868402
Mn	0.051192	0.0584303	0.03459	0.0454334	0.0583733	0.0410636	0.0639517	0.042605	0.0381082	0.0438654	0.0459192	0.0478016	0.0461865	0.0326745	0.0464814	0.0488862	0.0564852	0.0502621	0.0522097	0.043485	0.0414072	0.0596821	0.0355538	0.0592706	0.0471092	0.051296	0.0471818	0.054984	0.0540277	0.0452958	0.0448577	0.0436361	0.0443124	0.0327749	0.0357541	0.0461835	0.0459696	0.0520779	0.05406	0.0517987	0.0540619	0.0501634	0.0504206	0.0471889	0.0514953	0.0343006	0.0352639	0.0437854	0.0406196
Mg	2.69261	3.12117	2.56192	2.59875	2.54993	2.34587	2.36054	2.36846	3.27954	3.57339	3.54739	2.98553	3.05937	3.18102	2.46581	2.55485	2.442	2.48798	2.53265	2.78327	2.9381	2.94569	2.93976	2.82785	3.24224	2.88032	2.56137	2.55687	2.65793	2.44105	2.38037	2.41836	2.48158	2.4676	2.43332	2.788	2.80136	2.82022	2.58557	2.57483	2.60031	2.5222	2.54727	2.5204	3.00598	3.03602	2.93098	2.9288	3.02225
Ni	0	0	0	0	0	0	0	0	0	0	0	0	0	0	0	0	0	0	0	0	0	0	0	0	0	0	0	0	0	0	0	0	0	0	0	0	0	0	0	0	0	0	0	0	0	0	0	0	0
Zn	0	0	0	0	0	0	0	0	0	0	0	0	0	0	0	0	0	0	0	0	0	0	0	0	0	0	0	0	0	0	0	0	0	0	0	0	0	0	0	0	0	0	0	0	0	0	0	0	0
Li	0	0	0	0	0	0	0	0	0	0	0	0	0	0	0	0	0	0	0	0	0	0	0	0	0	0	0	0	0	0	0	0	0	0	0	0	0	0	0	0	0	0	0	0	0	0	0	0	0
Ca	1.93492	1.90099	1.91838	1.94368	1.95926	1.81044	1.78247	1.80752	1.98679	1.97091	1.93094	1.86896	1.8726	1.8585	1.95515	1.88934	1.86766	1.93814	1.9625	1.88793	1.92188	1.94665	1.94232	1.94005	2.00686	1.95644	1.91883	1.91229	1.95455	1.88373	1.9473	1.94762	1.97329	2.01038	1.97341	1.87368	1.85894	1.85369	1.93254	1.86716	1.918	1.85851	1.8949	1.86941	1.93724	1.9155	1.90147	1.88964	1.89464
Na	0.293564	0.264235	0.363364	0.375249	0.346429	0.480682	0.429144	0.486598	0.18435	0.0751177	0.0936166	0.27663	0.278033	0.238126	0.365496	0.391359	0.360122	0.325374	0.305235	0.324814	0.27756	0.255155	0.308871	0.319506	0.167962	0.255228	0.334098	0.32995	0.289738	0.388068	0.392844	0.35976	0.32625	0.315062	0.351001	0.358964	0.352287	0.347758	0.377001	0.373987	0.369598	0.392118	0.398712	0.414643	0.531987	0.541516	0.475888	0.5462	0.523425
K	0.193229	0.110003	0.202343	0.215123	0.236366	0.2711	0.286289	0.295874	0.0769928	0.0295751	0.0296279	0.0901965	0.0952863	0.0989407	0.258655	0.247283	0.262159	0.236319	0.22267	0.165768	0.144054	0.129451	0.144003	0.143042	0.0655431	0.113993	0.223423	0.216773	0.174207	0.294541	0.25133	0.284452	0.233318	0.235674	0.224779	0.222946	0.203426	0.181273	0.240903	0.231533	0.22334	0.262926	0.254928	0.272536	0.147156	0.117403	0.139812	0.122252	0.129069
Ba	0	0	0	0	0	0	0	0	0	0	0	0	0	0	0	0	0	0	0	0	0	0	0	0	0	0	0	0	0	0	0	0	0	0	0	0	0	0	0	0	0	0	0	0	0	0	0	0	0
Sr	0	0	0	0	0	0	0	0	0	0	0	0	0	0	0	0	0	0	0	0	0	0	0	0	0	0	0	0	0	0	0	0	0	0	0	0	0	0	0	0	0	0	0	0	0	0	0	0	0
Pb	0	0	0	0	0	0	0	0	0	0	0	0	0	0	0	0	0	0	0	0	0	0	0	0	0	0	0	0	0	0	0	0	0	0	0	0	0	0	0	0	0	0	0	0	0	0	0	0	0
F	0	0	0	0	0	0	0	0	0	0	0	0	0	0	0	0	0	0	0	0	0	0	0	0	0	0	0	0	0	0	0	0	0	0	0	0	0	0	0	0	0	0	0	0	0	0	0	0	0
Cl	0	0	0	0	0	0	0	0	0	0	0	0	0	0	0	0	0	0	0	0	0	0	0	0	0	0	0	0	0	0	0	0	0	0	0	0	0	0	0	0	0	0	0	0	0	0	0	0	0
Total	15.5547	15.4234	15.6032	15.6893	15.648	15.7516	15.6806	15.7437	15.3034	15.1054	15.1346	15.3981	15.4055	15.3632	15.741	15.7247	15.6759	15.6679	15.649	15.5786	15.4861	15.4479	15.541	15.5742	15.2807	15.4248	15.6112	15.6118	15.5724	15.7414	15.7265	15.7466	15.6752	15.7256	15.6815	15.6054	15.57	15.6117	15.6909	15.6712	15.6754	15.7046	15.7134	15.7348	15.7113	15.7007	15.6391	15.6795	15.7075
Part 5b. Cations based on 23 O. ∑15 (Fe2+ - Fe3+)
Si	6.80548	7.12761	6.64989	6.60511	6.59135	6.40326	6.46721	6.41504	7.36651	7.72444	7.66766	7.08986	7.13106	7.22019	6.44799	6.47305	6.53574	6.56084	6.62634	6.80905	6.95912	7.0163	6.89625	6.84648	7.38203	7.06337	6.68877	6.66137	6.77621	6.44746	6.48996	6.4434	6.61723	6.53548	6.60669	6.7783	6.82077	6.765	6.56741	6.54284	6.56196	6.44223	6.46858	6.43348	6.55382	6.52771	6.55041	6.53456	6.51499
Ti	0.041616	0.0240005	0.0615816	0.062441	0.0709197	0.0710487	0.0765113	0.0762352	0.0179532	0.00583046	0.00826922	0.0279787	0.0210224	0.0233847	0.0583536	0.0703525	0.0633823	0.0564396	0.0547211	0.0375872	0.0372628	0.0327068	0.0332739	0.0339904	0.0143192	0.0258476	0.048056	0.0570139	0.0445799	0.0695069	0.0600322	0.0603868	0.0506248	0.0571266	0.0608925	0.0472383	0.0473703	0.042724	0.0616585	0.0589391	0.0647721	0.0683916	0.0762474	0.0672774	0.0603509	0.0527758	0.0494125	0.0573018	0.0608571
Al	1.6832	1.22428	1.93635	1.87664	1.96228	2.30006	2.26674	2.31245	0.885555	0.433319	0.502262	1.33488	1.25824	1.12345	2.1294	2.10239	2.07232	1.99138	1.86786	1.64011	1.45674	1.39087	1.51178	1.55319	0.87943	1.3412	1.86141	1.88635	1.67755	2.1658	2.0912	2.14342	1.87346	1.91438	1.87755	1.71997	1.67936	1.6902	1.978	2.05963	1.98858	2.22467	2.13719	2.21614	2.02813	2.09658	2.13789	2.12569	2.0858
Cr	0	0	0	0	0	0	0	0	0	0	0	0	0	0	0	0	0	0	0	0	0	0	0	0	0	0	0	0	0	0	0	0	0	0	0	0	0	0	0	0	0	0	0	0	0	0	0	0	0
Fe3+	0.208256	0.150654	0.115005	0.303416	0.199929	0	0	0	0.129071	0.00222232	0.0347079	0.0960169	0.0985501	0.0802527	0.358436	0.263994	0.164312	0.325625	0.371249	0.269906	0.197623	0.193968	0.270339	0.342442	0.144693	0.17042	0.164702	0.19956	0.332633	0.18042	0.252455	0.314031	0.354602	0.536141	0.324318	0.0721331	0.0439179	0.253482	0.223801	0.201316	0.25302	0.151868	0.183256	0.14592	0.0987049	0.128089	0.071721	0.0339567	0.168701
Fe2+	1.65064	1.44199	1.75978	1.66347	1.67316	2.02802	1.94777	1.93895	1.33856	1.24675	1.27417	1.58028	1.5451	1.50671	1.65525	1.68322	1.85168	1.69551	1.65353	1.61668	1.51231	1.47738	1.45889	1.5084	1.3305	1.56668	1.76339	1.73663	1.611	1.82557	1.81615	1.73155	1.72053	1.62094	1.79382	1.69802	1.71663	1.60526	1.66994	1.70913	1.6418	1.73149	1.70189	1.74777	1.29646	1.25079	1.34624	1.39735	1.26716
Mn	0.051192	0.0584303	0.03459	0.0454334	0.0583733	0.0410636	0.0639517	0.042605	0.0381082	0.0438654	0.0459192	0.0478016	0.0461865	0.0326745	0.0464814	0.0488862	0.0564852	0.0502621	0.0522097	0.043485	0.0414072	0.0596821	0.0355538	0.0592706	0.0471092	0.051296	0.0471818	0.054984	0.0540277	0.0452958	0.0448577	0.0436361	0.0443124	0.0327749	0.0357541	0.0461835	0.0459696	0.0520779	0.05406	0.0517987	0.0540619	0.0501634	0.0504206	0.0471889	0.0514953	0.0343006	0.0352639	0.0437854	0.0406196
Mg	2.69261	3.12117	2.56192	2.59875	2.54993	2.34587	2.36054	2.36846	3.27954	3.57339	3.54739	2.98553	3.05937	3.18102	2.46581	2.55485	2.442	2.48798	2.53265	2.78327	2.9381	2.94569	2.93976	2.82785	3.24224	2.88032	2.56137	2.55687	2.65793	2.44105	2.38037	2.41836	2.48158	2.4676	2.43332	2.788	2.80136	2.82022	2.58557	2.57483	2.60031	2.5222	2.54727	2.5204	3.00598	3.03602	2.93098	2.9288	3.02225
Ni	0	0	0	0	0	0	0	0	0	0	0	0	0	0	0	0	0	0	0	0	0	0	0	0	0	0	0	0	0	0	0	0	0	0	0	0	0	0	0	0	0	0	0	0	0	0	0	0	0
Zn	0	0	0	0	0	0	0	0	0	0	0	0	0	0	0	0	0	0	0	0	0	0	0	0	0	0	0	0	0	0	0	0	0	0	0	0	0	0	0	0	0	0	0	0	0	0	0	0	0
Li	0	0	0	0	0	0	0	0	0	0	0	0	0	0	0	0	0	0	0	0	0	0	0	0	0	0	0	0	0	0	0	0	0	0	0	0	0	0	0	0	0	0	0	0	0	0	0	0	0
Ca	1.93492	1.90099	1.91838	1.94368	1.95926	1.81044	1.78247	1.80752	1.98679	1.97091	1.93094	1.86896	1.8726	1.8585	1.95515	1.88934	1.86766	1.93814	1.9625	1.88793	1.92188	1.94665	1.94232	1.94005	2.00686	1.95644	1.91883	1.91229	1.95455	1.88373	1.9473	1.94762	1.97329	2.01038	1.97341	1.87368	1.85894	1.85369	1.93254	1.86716	1.918	1.85851	1.8949	1.86941	1.93724	1.9155	1.90147	1.88964	1.89464
Na	0.293564	0.264235	0.363364	0.375249	0.346429	0.480682	0.429144	0.486598	0.18435	0.0751177	0.0936166	0.27663	0.278033	0.238126	0.365496	0.391359	0.360122	0.325374	0.305235	0.324814	0.27756	0.255155	0.308871	0.319506	0.167962	0.255228	0.334098	0.32995	0.289738	0.388068	0.392844	0.35976	0.32625	0.315062	0.351001	0.358964	0.352287	0.347758	0.377001	0.373987	0.369598	0.392118	0.398712	0.414643	0.531987	0.541516	0.475888	0.5462	0.523425
K	0.193229	0.110003	0.202343	0.215123	0.236366	0.2711	0.286289	0.295874	0.0769928	0.0295751	0.0296279	0.0901965	0.0952863	0.0989407	0.258655	0.247283	0.262159	0.236319	0.22267	0.165768	0.144054	0.129451	0.144003	0.143042	0.0655431	0.113993	0.223423	0.216773	0.174207	0.294541	0.25133	0.284452	0.233318	0.235674	0.224779	0.222946	0.203426	0.181273	0.240903	0.231533	0.22334	0.262926	0.254928	0.272536	0.147156	0.117403	0.139812	0.122252	0.129069
Ba	0	0	0	0	0	0	0	0	0	0	0	0	0	0	0	0	0	0	0	0	0	0	0	0	0	0	0	0	0	0	0	0	0	0	0	0	0	0	0	0	0	0	0	0	0	0	0	0	0
Sr	0	0	0	0	0	0	0	0	0	0	0	0	0	0	0	0	0	0	0	0	0	0	0	0	0	0	0	0	0	0	0	0	0	0	0	0	0	0	0	0	0	0	0	0	0	0	0	0	0
Pb	0	0	0	0	0	0	0	0	0	0	0	0	0	0	0	0	0	0	0	0	0	0	0	0	0	0	0	0	0	0	0	0	0	0	0	0	0	0	0	0	0	0	0	0	0	0	0	0	0
F	0	0	0	0	0	0	0	0	0	0	0	0	0	0	0	0	0	0	0	0	0	0	0	0	0	0	0	0	0	0	0	0	0	0	0	0	0	0	0	0	0	0	0	0	0	0	0	0	0
Cl	0	0	0	0	0	0	0	0	0	0	0	0	0	0	0	0	0	0	0	0	0	0	0	0	0	0	0	0	0	0	0	0	0	0	0	0	0	0	0	0	0	0	0	0	0	0	0	0	0
Total	15.5547	15.4234	15.6032	15.6893	15.648	15.7516	15.6806	15.7437	15.3034	15.1054	15.1346	15.3981	15.4055	15.3632	15.741	15.7247	15.6759	15.6679	15.649	15.5786	15.4861	15.4479	15.541	15.5742	15.2807	15.4248	15.6112	15.6118	15.5724	15.7414	15.7265	15.7466	15.6752	15.7256	15.6815	15.6054	15.57	15.6117	15.6909	15.6712	15.6754	15.7046	15.7134	15.7348	15.7113	15.7007	15.6391	15.6795	15.7075
Part 6a. Intermediate 23 O - recheck sum anions ∑13
Si	13.611	14.2552	13.2998	13.2102	13.1827	12.8065	12.9344	12.8301	14.733	15.4489	15.3353	14.1797	14.2621	14.4404	12.896	12.9461	13.0715	13.1217	13.2527	13.6181	13.9182	14.0326	13.7925	13.693	14.7641	14.1267	13.3775	13.3227	13.5524	12.8949	12.9799	12.8868	13.2345	13.071	13.2134	13.5566	13.6415	13.53	13.1348	13.0857	13.1239	12.8845	12.9372	12.867	13.1076	13.0554	13.1008	13.0691	13.03
Ti	0.083232	0.0480011	0.123163	0.124882	0.141839	0.142097	0.153023	0.15247	0.0359065	0.0116609	0.0165384	0.0559575	0.0420449	0.0467695	0.116707	0.140705	0.126765	0.112879	0.109442	0.0751743	0.0745256	0.0654136	0.0665478	0.0679807	0.0286383	0.0516952	0.096112	0.114028	0.0891599	0.139014	0.120064	0.120774	0.10125	0.114253	0.121785	0.0944765	0.0947405	0.085448	0.123317	0.117878	0.129544	0.136783	0.152495	0.134555	0.120702	0.105552	0.098825	0.114604	0.121714
Al	2.5248	1.83642	2.90453	2.81496	2.94342	3.45009	3.40011	3.46868	1.32833	0.649978	0.753393	2.00232	1.88736	1.68518	3.19411	3.15359	3.10847	2.98707	2.80178	2.46016	2.18511	2.08631	2.26767	2.32978	1.31914	2.01179	2.79212	2.82953	2.51633	3.2487	3.1368	3.21513	2.81019	2.87158	2.81633	2.57996	2.51904	2.5353	2.96701	3.08945	2.98287	3.337	3.20579	3.32421	3.0422	3.14487	3.20683	3.18853	3.1287
Cr	0	0	0	0	0	0	0	0	0	0	0	0	0	0	0	0	0	0	0	0	0	0	0	0	0	0	0	0	0	0	0	0	0	0	0	0	0	0	0	0	0	0	0	0	0	0	0	0	0
Fe3+	0.70587	0.786286	0.632251	0.824091	0.562286	1.0049	0.969811	0.816037	0.293514	0.158251	0.426622	0.861705	0.846761	0.889962	0.8584	1.04425	0.986798	0.891903	0.841581	1.06198	0.756689	0.618879	0.774051	0.910893	0.214003	0.526166	0.715908	0.810951	0.816964	0.929393	0.716655	0.821512	0.755484	0.872841	0.702444	0.795331	0.824689	1.21526	0.745384	1.05348	0.873158	1.01386	0.874999	0.945672	0.503967	0.670169	0.647081	0.644546	0.851184
Fe2+	1.38831	1.06846	1.45329	1.41749	1.49823	1.35809	1.30122	1.39493	1.27196	1.14347	1.02446	1.10183	1.07914	0.993651	1.44142	1.25105	1.35813	1.42653	1.46373	1.17859	1.20548	1.25876	1.21319	1.24358	1.33252	1.38633	1.45082	1.39556	1.39899	1.3864	1.59083	1.4979	1.57148	1.57518	1.64985	1.23993	1.21075	1.04856	1.39682	1.20812	1.31272	1.20746	1.30182	1.26324	1.05919	0.932097	0.986575	1.0016	0.868402
Mn	0.051192	0.0584303	0.03459	0.0454334	0.0583733	0.0410636	0.0639517	0.042605	0.0381082	0.0438654	0.0459192	0.0478016	0.0461865	0.0326745	0.0464814	0.0488862	0.0564852	0.0502621	0.0522097	0.043485	0.0414072	0.0596821	0.0355538	0.0592706	0.0471092	0.051296	0.0471818	0.054984	0.0540277	0.0452958	0.0448577	0.0436361	0.0443124	0.0327749	0.0357541	0.0461835	0.0459696	0.0520779	0.05406	0.0517987	0.0540619	0.0501634	0.0504206	0.0471889	0.0514953	0.0343006	0.0352639	0.0437854	0.0406196
Mg	2.69261	3.12117	2.56192	2.59875	2.54993	2.34587	2.36054	2.36846	3.27954	3.57339	3.54739	2.98553	3.05937	3.18102	2.46581	2.55485	2.442	2.48798	2.53265	2.78327	2.9381	2.94569	2.93976	2.82785	3.24224	2.88032	2.56137	2.55687	2.65793	2.44105	2.38037	2.41836	2.48158	2.4676	2.43332	2.788	2.80136	2.82022	2.58557	2.57483	2.60031	2.5222	2.54727	2.5204	3.00598	3.03602	2.93098	2.9288	3.02225
Ni	0	0	0	0	0	0	0	0	0	0	0	0	0	0	0	0	0	0	0	0	0	0	0	0	0	0	0	0	0	0	0	0	0	0	0	0	0	0	0	0	0	0	0	0	0	0	0	0	0
Zn	0	0	0	0	0	0	0	0	0	0	0	0	0	0	0	0	0	0	0	0	0	0	0	0	0	0	0	0	0	0	0	0	0	0	0	0	0	0	0	0	0	0	0	0	0	0	0	0	0
Li	0	0	0	0	0	0	0	0	0	0	0	0	0	0	0	0	0	0	0	0	0	0	0	0	0	0	0	0	0	0	0	0	0	0	0	0	0	0	0	0	0	0	0	0	0	0	0	0	0
Ca	1.93492	1.90099	1.91838	1.94368	1.95926	1.81044	1.78247	1.80752	1.98679	1.97091	1.93094	1.86896	1.8726	1.8585	1.95515	1.88934	1.86766	1.93814	1.9625	1.88793	1.92188	1.94665	1.94232	1.94005	2.00686	1.95644	1.91883	1.91229	1.95455	1.88373	1.9473	1.94762	1.97329	2.01038	1.97341	1.87368	1.85894	1.85369	1.93254	1.86716	1.918	1.85851	1.8949	1.86941	1.93724	1.9155	1.90147	1.88964	1.89464
Na	0.146782	0.132117	0.181682	0.187624	0.173214	0.240341	0.214572	0.243299	0.0921752	0.0375588	0.0468083	0.138315	0.139016	0.119063	0.182748	0.195679	0.180061	0.162687	0.152617	0.162407	0.13878	0.127577	0.154436	0.159753	0.0839812	0.127614	0.167049	0.164975	0.144869	0.194034	0.196422	0.17988	0.163125	0.157531	0.175501	0.179482	0.176143	0.173879	0.188501	0.186993	0.184799	0.196059	0.199356	0.207321	0.265993	0.270758	0.237944	0.2731	0.261712
K	0.0966146	0.0550013	0.101172	0.107562	0.118183	0.13555	0.143145	0.147937	0.0384964	0.0147875	0.0148139	0.0450983	0.0476431	0.0494704	0.129328	0.123642	0.131079	0.11816	0.111335	0.0828841	0.072027	0.0647257	0.0720013	0.071521	0.0327716	0.0569966	0.111712	0.108387	0.0871034	0.14727	0.125665	0.142226	0.116659	0.117837	0.11239	0.111473	0.101713	0.0906365	0.120452	0.115767	0.11167	0.131463	0.127464	0.136268	0.0735782	0.0587014	0.0699062	0.061126	0.0645344
Ba	0	0	0	0	0	0	0	0	0	0	0	0	0	0	0	0	0	0	0	0	0	0	0	0	0	0	0	0	0	0	0	0	0	0	0	0	0	0	0	0	0	0	0	0	0	0	0	0	0
Sr	0	0	0	0	0	0	0	0	0	0	0	0	0	0	0	0	0	0	0	0	0	0	0	0	0	0	0	0	0	0	0	0	0	0	0	0	0	0	0	0	0	0	0	0	0	0	0	0	0
Pb	0	0	0	0	0	0	0	0	0	0	0	0	0	0	0	0	0	0	0	0	0	0	0	0	0	0	0	0	0	0	0	0	0	0	0	0	0	0	0	0	0	0	0	0	0	0	0	0	0
F	0	0	0	0	0	0	0	0	0	0	0	0	0	0	0	0	0	0	0	0	0	0	0	0	0	0	0	0	0	0	0	0	0	0	0	0	0	0	0	0	0	0	0	0	0	0	0	0	0
Cl	0	0	0	0	0	0	0	0	0	0	0	0	0	0	0	0	0	0	0	0	0	0	0	0	0	0	0	0	0	0	0	0	0	0	0	0	0	0	0	0	0	0	0	0	0	0	0	0	0
Total exc. F, Cl	23.2353	23.2621	23.2108	23.2747	23.1874	23.335	23.3233	23.272	23.0978	23.0528	23.1422	23.2872	23.2823	23.2967	23.2861	23.3481	23.3289	23.2973	23.2805	23.354	23.2522	23.2063	23.258	23.3036	23.0713	23.1754	23.2386	23.2703	23.2723	23.3098	23.2389	23.2738	23.2518	23.2909	23.2341	23.2651	23.2749	23.4051	23.2485	23.3512	23.2911	23.338	23.2917	23.3152	23.168	23.2234	23.2157	23.2148	23.2837
adjustment factor	0.989874	0.988733	0.99092	0.988198	0.991917	0.985645	0.98614	0.988312	0.995764	0.997712	0.993855	0.987666	0.987877	0.987266	0.987712	0.985092	0.9859	0.987239	0.98795	0.984842	0.989152	0.99111	0.988906	0.986971	0.996908	0.992432	0.989731	0.988384	0.988298	0.98671	0.98972	0.988234	0.98917	0.987508	0.989922	0.988605	0.988189	0.982692	0.989313	0.984962	0.987504	0.985519	0.987478	0.98648	0.992749	0.990381	0.990709	0.990745	0.987814
Part 6b. Intermediate 23 O - recheck sum anions ∑15
Si	13.611	14.2552	13.2998	13.2102	13.1827	12.8065	12.9344	12.8301	14.733	15.4489	15.3353	14.1797	14.2621	14.4404	12.896	12.9461	13.0715	13.1217	13.2527	13.6181	13.9182	14.0326	13.7925	13.693	14.7641	14.1267	13.3775	13.3227	13.5524	12.8949	12.9799	12.8868	13.2345	13.071	13.2134	13.5566	13.6415	13.53	13.1348	13.0857	13.1239	12.8845	12.9372	12.867	13.1076	13.0554	13.1008	13.0691	13.03
Ti	0.083232	0.0480011	0.123163	0.124882	0.141839	0.142097	0.153023	0.15247	0.0359065	0.0116609	0.0165384	0.0559575	0.0420449	0.0467695	0.116707	0.140705	0.126765	0.112879	0.109442	0.0751743	0.0745256	0.0654136	0.0665478	0.0679807	0.0286383	0.0516952	0.096112	0.114028	0.0891599	0.139014	0.120064	0.120774	0.10125	0.114253	0.121785	0.0944765	0.0947405	0.085448	0.123317	0.117878	0.129544	0.136783	0.152495	0.134555	0.120702	0.105552	0.098825	0.114604	0.121714
Al	2.5248	1.83642	2.90453	2.81496	2.94342	3.45009	3.40011	3.46868	1.32833	0.649978	0.753393	2.00232	1.88736	1.68518	3.19411	3.15359	3.10847	2.98707	2.80178	2.46016	2.18511	2.08631	2.26767	2.32978	1.31914	2.01179	2.79212	2.82953	2.51633	3.2487	3.1368	3.21513	2.81019	2.87158	2.81633	2.57996	2.51904	2.5353	2.96701	3.08945	2.98287	3.337	3.20579	3.32421	3.0422	3.14487	3.20683	3.18853	3.1287
Cr	0	0	0	0	0	0	0	0	0	0	0	0	0	0	0	0	0	0	0	0	0	0	0	0	0	0	0	0	0	0	0	0	0	0	0	0	0	0	0	0	0	0	0	0	0	0	0	0	0
Fe3+	0.312384	0.225981	0.172507	0.455125	0.299894	0	0	0	0.193606	0.00333347	0.0520618	0.144025	0.147825	0.120379	0.537653	0.395992	0.246467	0.488437	0.556874	0.40486	0.296434	0.290952	0.405509	0.513663	0.217039	0.255629	0.247054	0.29934	0.498949	0.27063	0.378683	0.471046	0.531903	0.804211	0.486477	0.1082	0.0658768	0.380223	0.335701	0.301974	0.37953	0.227802	0.274885	0.218881	0.148057	0.192134	0.107581	0.050935	0.253051
Fe2+	1.65064	1.44199	1.75978	1.66347	1.67316	2.02802	1.94777	1.93895	1.33856	1.24675	1.27417	1.58028	1.5451	1.50671	1.65525	1.68322	1.85168	1.69551	1.65353	1.61668	1.51231	1.47738	1.45889	1.5084	1.3305	1.56668	1.76339	1.73663	1.611	1.82557	1.81615	1.73155	1.72053	1.62094	1.79382	1.69802	1.71663	1.60526	1.66994	1.70913	1.6418	1.73149	1.70189	1.74777	1.29646	1.25079	1.34624	1.39735	1.26716
Mn	0.051192	0.0584303	0.03459	0.0454334	0.0583733	0.0410636	0.0639517	0.042605	0.0381082	0.0438654	0.0459192	0.0478016	0.0461865	0.0326745	0.0464814	0.0488862	0.0564852	0.0502621	0.0522097	0.043485	0.0414072	0.0596821	0.0355538	0.0592706	0.0471092	0.051296	0.0471818	0.054984	0.0540277	0.0452958	0.0448577	0.0436361	0.0443124	0.0327749	0.0357541	0.0461835	0.0459696	0.0520779	0.05406	0.0517987	0.0540619	0.0501634	0.0504206	0.0471889	0.0514953	0.0343006	0.0352639	0.0437854	0.0406196
Mg	2.69261	3.12117	2.56192	2.59875	2.54993	2.34587	2.36054	2.36846	3.27954	3.57339	3.54739	2.98553	3.05937	3.18102	2.46581	2.55485	2.442	2.48798	2.53265	2.78327	2.9381	2.94569	2.93976	2.82785	3.24224	2.88032	2.56137	2.55687	2.65793	2.44105	2.38037	2.41836	2.48158	2.4676	2.43332	2.788	2.80136	2.82022	2.58557	2.57483	2.60031	2.5222	2.54727	2.5204	3.00598	3.03602	2.93098	2.9288	3.02225
Ni	0	0	0	0	0	0	0	0	0	0	0	0	0	0	0	0	0	0	0	0	0	0	0	0	0	0	0	0	0	0	0	0	0	0	0	0	0	0	0	0	0	0	0	0	0	0	0	0	0
Zn	0	0	0	0	0	0	0	0	0	0	0	0	0	0	0	0	0	0	0	0	0	0	0	0	0	0	0	0	0	0	0	0	0	0	0	0	0	0	0	0	0	0	0	0	0	0	0	0	0
Li	0	0	0	0	0	0	0	0	0	0	0	0	0	0	0	0	0	0	0	0	0	0	0	0	0	0	0	0	0	0	0	0	0	0	0	0	0	0	0	0	0	0	0	0	0	0	0	0	0
Ca	1.93492	1.90099	1.91838	1.94368	1.95926	1.81044	1.78247	1.80752	1.98679	1.97091	1.93094	1.86896	1.8726	1.8585	1.95515	1.88934	1.86766	1.93814	1.9625	1.88793	1.92188	1.94665	1.94232	1.94005	2.00686	1.95644	1.91883	1.91229	1.95455	1.88373	1.9473	1.94762	1.97329	2.01038	1.97341	1.87368	1.85894	1.85369	1.93254	1.86716	1.918	1.85851	1.8949	1.86941	1.93724	1.9155	1.90147	1.88964	1.89464
Na	0.146782	0.132117	0.181682	0.187624	0.173214	0.240341	0.214572	0.243299	0.0921752	0.0375588	0.0468083	0.138315	0.139016	0.119063	0.182748	0.195679	0.180061	0.162687	0.152617	0.162407	0.13878	0.127577	0.154436	0.159753	0.0839812	0.127614	0.167049	0.164975	0.144869	0.194034	0.196422	0.17988	0.163125	0.157531	0.175501	0.179482	0.176143	0.173879	0.188501	0.186993	0.184799	0.196059	0.199356	0.207321	0.265993	0.270758	0.237944	0.2731	0.261712
K	0.0966146	0.0550013	0.101172	0.107562	0.118183	0.13555	0.143145	0.147937	0.0384964	0.0147875	0.0148139	0.0450983	0.0476431	0.0494704	0.129328	0.123642	0.131079	0.11816	0.111335	0.0828841	0.072027	0.0647257	0.0720013	0.071521	0.0327716	0.0569966	0.111712	0.108387	0.0871034	0.14727	0.125665	0.142226	0.116659	0.117837	0.11239	0.111473	0.101713	0.0906365	0.120452	0.115767	0.11167	0.131463	0.127464	0.136268	0.0735782	0.0587014	0.0699062	0.061126	0.0645344
Ba	0	0	0	0	0	0	0	0	0	0	0	0	0	0	0	0	0	0	0	0	0	0	0	0	0	0	0	0	0	0	0	0	0	0	0	0	0	0	0	0	0	0	0	0	0	0	0	0	0
Sr	0	0	0	0	0	0	0	0	0	0	0	0	0	0	0	0	0	0	0	0	0	0	0	0	0	0	0	0	0	0	0	0	0	0	0	0	0	0	0	0	0	0	0	0	0	0	0	0	0
Pb	0	0	0	0	0	0	0	0	0	0	0	0	0	0	0	0	0	0	0	0	0	0	0	0	0	0	0	0	0	0	0	0	0	0	0	0	0	0	0	0	0	0	0	0	0	0	0	0	0
F	0	0	0	0	0	0	0	0	0	0	0	0	0	0	0	0	0	0	0	0	0	0	0	0	0	0	0	0	0	0	0	0	0	0	0	0	0	0	0	0	0	0	0	0	0	0	0	0	0
Cl	0	0	0	0	0	0	0	0	0	0	0	0	0	0	0	0	0	0	0	0	0	0	0	0	0	0	0	0	0	0	0	0	0	0	0	0	0	0	0	0	0	0	0	0	0	0	0	0	0
Total exc. F, Cl	23.1041	23.0753	23.0575	23.1517	23.1	23	23	23	23.0645	23.0011	23.0174	23.048	23.0493	23.0401	23.1792	23.132	23.0822	23.1628	23.1856	23.135	23.0988	23.097	23.1352	23.1712	23.0723	23.0852	23.0824	23.0998	23.1663	23.0902	23.1262	23.157	23.1773	23.2681	23.1622	23.0361	23.022	23.1267	23.1119	23.1007	23.1265	23.0759	23.0916	23.073	23.0494	23.064	23.0359	23.017	23.0844
adjustment factor	0.995493	0.996736	0.997506	0.993447	0.995673	1	1	1	0.997202	0.999952	0.999246	0.997917	0.997862	0.998258	0.992268	0.994294	0.996441	0.992971	0.991994	0.994167	0.995722	0.995801	0.994157	0.992611	0.996864	0.996309	0.996432	0.99568	0.992821	0.996093	0.994542	0.99322	0.99235	0.988479	0.992999	0.998434	0.999046	0.99452	0.995158	0.995643	0.99453	0.996709	0.996032	0.996838	0.997859	0.997223	0.998443	0.999262	0.996346
Part 7a. Formula based on 23 (O) inc. Fe2/Fe3 (∑13)
Si	6.73656	7.04731	6.58951	6.52716	6.53807	6.31134	6.37757	6.34006	7.33531	7.70676	7.62054	7.00241	7.04461	7.12825	6.36876	6.37654	6.44359	6.47712	6.54649	6.70584	6.88363	6.95393	6.81974	6.75727	7.35921	7.00992	6.62008	6.58399	6.69691	6.36177	6.42325	6.36758	6.54556	6.45384	6.5401	6.70106	6.74021	6.64792	6.49722	6.44444	6.47996	6.34894	6.38758	6.3465	6.5063	6.46491	6.48955	6.47408	6.4356
Ti	0.0411946	0.0237301	0.0610225	0.0617041	0.0703465	0.0700288	0.0754508	0.0753441	0.0178772	0.00581712	0.00821841	0.0276336	0.0207676	0.023087	0.0576366	0.0693037	0.0624886	0.0557193	0.0540617	0.0370174	0.0368586	0.032416	0.0329048	0.0335475	0.0142749	0.025652	0.0475625	0.0563516	0.0440583	0.0685831	0.0594151	0.0596763	0.0500765	0.056413	0.0602789	0.0467	0.0468108	0.0419846	0.0609995	0.0580528	0.0639627	0.0674013	0.0752926	0.0663679	0.0599133	0.0522681	0.0489534	0.0567715	0.0601155
Al	1.66615	1.21049	1.91877	1.85449	1.94642	2.26705	2.23532	2.28542	0.881804	0.432327	0.499176	1.31842	1.24299	1.10915	2.10324	2.07105	2.0431	1.96597	1.84535	1.61525	1.44094	1.37851	1.49501	1.53295	0.876711	1.33105	1.8423	1.86444	1.65792	2.13702	2.0697	2.1182	1.85317	1.89047	1.85863	1.70037	1.65953	1.66095	1.95687	2.02866	1.96373	2.19245	2.11043	2.18618	2.01343	2.07641	2.11803	2.10601	2.06038
Cr	0	0	0	0	0	0	0	0	0	0	0	0	0	0	0	0	0	0	0	0	0	0	0	0	0	0	0	0	0	0	0	0	0	0	0	0	0	0	0	0	0	0	0	0	0	0	0	0	0
Fe3+	0.465815	0.518284	0.417674	0.54291	0.371827	0.660317	0.637579	0.537666	0.194847	0.10526	0.282667	0.567385	0.557664	0.585753	0.565235	0.685787	0.648589	0.587014	0.554293	0.697257	0.498987	0.408918	0.510309	0.59935	0.142228	0.348123	0.472371	0.534354	0.53827	0.61136	0.472859	0.541231	0.498201	0.574625	0.463577	0.524179	0.543299	0.796152	0.491612	0.691761	0.574831	0.666116	0.576028	0.621924	0.333542	0.442481	0.427379	0.425721	0.560541
Fe2+	1.37425	1.05642	1.44009	1.40076	1.48612	1.33859	1.28319	1.37862	1.26657	1.14085	1.01816	1.08824	1.06606	0.980998	1.42371	1.2324	1.33898	1.40833	1.44609	1.16073	1.1924	1.24757	1.19974	1.22738	1.3284	1.37583	1.43592	1.37935	1.38261	1.36797	1.57448	1.48028	1.55446	1.55551	1.63322	1.2258	1.19645	1.03041	1.38189	1.18995	1.29631	1.18997	1.28552	1.24616	1.05151	0.923131	0.977409	0.992335	0.85782
Mn	0.0506737	0.057772	0.034276	0.0448972	0.0579015	0.0404742	0.0630653	0.042107	0.0379468	0.043765	0.045637	0.047212	0.0456265	0.0322584	0.0459103	0.0481573	0.0556888	0.0496207	0.0515805	0.0428259	0.040958	0.0591515	0.0351594	0.0584983	0.0469636	0.0509078	0.0466973	0.0543453	0.0533955	0.0446938	0.0443966	0.0431227	0.0438325	0.0323655	0.0353938	0.0456572	0.0454266	0.0511766	0.0534822	0.0510197	0.0533863	0.049437	0.0497892	0.0465509	0.0511219	0.0339707	0.0349362	0.0433802	0.0401246
Mg	2.66535	3.086	2.53866	2.56808	2.52932	2.3122	2.32782	2.34078	3.26565	3.56521	3.5256	2.94871	3.02228	3.14051	2.43551	2.51676	2.40757	2.45623	2.50213	2.74108	2.90623	2.9195	2.90714	2.79101	3.23222	2.85852	2.53507	2.52717	2.62683	2.40861	2.3559	2.38991	2.4547	2.43677	2.4088	2.75623	2.76827	2.77141	2.55793	2.53611	2.56782	2.48568	2.51537	2.48632	2.98418	3.00682	2.90375	2.9017	2.98542
Ni	0	0	0	0	0	0	0	0	0	0	0	0	0	0	0	0	0	0	0	0	0	0	0	0	0	0	0	0	0	0	0	0	0	0	0	0	0	0	0	0	0	0	0	0	0	0	0	0	0
Zn	0	0	0	0	0	0	0	0	0	0	0	0	0	0	0	0	0	0	0	0	0	0	0	0	0	0	0	0	0	0	0	0	0	0	0	0	0	0	0	0	0	0	0	0	0	0	0	0	0
Li	0	0	0	0	0	0	0	0	0	0	0	0	0	0	0	0	0	0	0	0	0	0	0	0	0	0	0	0	0	0	0	0	0	0	0	0	0	0	0	0	0	0	0	0	0	0	0	0	0
Ca	1.91533	1.87957	1.90096	1.92074	1.94342	1.78445	1.75777	1.78639	1.97837	1.9664	1.91907	1.84591	1.8499	1.83483	1.93113	1.86118	1.84133	1.91341	1.93885	1.85931	1.90103	1.92935	1.92077	1.91477	2.00066	1.94163	1.89912	1.89007	1.93168	1.85869	1.92728	1.92471	1.95192	1.98527	1.95352	1.85233	1.83699	1.82161	1.91189	1.83909	1.89403	1.83159	1.87117	1.84414	1.92319	1.89708	1.88381	1.87215	1.87156
Na	0.290591	0.261258	0.360064	0.37082	0.343629	0.473782	0.423196	0.48091	0.183569	0.0749458	0.0930414	0.273218	0.274662	0.235093	0.361005	0.385524	0.355045	0.321222	0.301557	0.319891	0.274549	0.252886	0.305445	0.315343	0.167443	0.253296	0.330668	0.326117	0.286348	0.382911	0.388806	0.355527	0.322717	0.311127	0.347464	0.354873	0.348126	0.341739	0.372972	0.368363	0.364979	0.386439	0.393719	0.409037	0.528129	0.536307	0.471467	0.541145	0.517047
K	0.191272	0.108763	0.200506	0.212584	0.234455	0.267208	0.282321	0.292416	0.0766666	0.0295074	0.0294458	0.089084	0.0941311	0.0976808	0.255477	0.243597	0.258462	0.233303	0.219987	0.163255	0.142491	0.128301	0.142405	0.141178	0.0653405	0.113131	0.221129	0.214255	0.172168	0.290626	0.248747	0.281106	0.230791	0.23273	0.222514	0.220405	0.201023	0.178136	0.238329	0.228051	0.220549	0.259119	0.251736	0.268852	0.146089	0.116273	0.138514	0.121121	0.127496
Ba	0	0	0	0	0	0	0	0	0	0	0	0	0	0	0	0	0	0	0	0	0	0	0	0	0	0	0	0	0	0	0	0	0	0	0	0	0	0	0	0	0	0	0	0	0	0	0	0	0
Sr	0	0	0	0	0	0	0	0	0	0	0	0	0	0	0	0	0	0	0	0	0	0	0	0	0	0	0	0	0	0	0	0	0	0	0	0	0	0	0	0	0	0	0	0	0	0	0	0	0
Pb	0	0	0	0	0	0	0	0	0	0	0	0	0	0	0	0	0	0	0	0	0	0	0	0	0	0	0	0	0	0	0	0	0	0	0	0	0	0	0	0	0	0	0	0	0	0	0	0	0
F	0	0	0	0	0	0	0	0	0	0	0	0	0	0	0	0	0	0	0	0	0	0	0	0	0	0	0	0	0	0	0	0	0	0	0	0	0	0	0	0	0	0	0	0	0	0	0	0	0
Cl	0	0	0	0	0	0	0	0	0	0	0	0	0	0	0	0	0	0	0	0	0	0	0	0	0	0	0	0	0	0	0	0	0	0	0	0	0	0	0	0	0	0	0	0	0	0	0	0	0
OE FM	23	23	23	23	23	23	23	23	23	23	23	23	23	23	23	23	23	23	23	23	23	23	23	23	23	23	23	23	23	23	23	23	23	23	23	23	23	23	23	23	23	23	23	23	23	23	23	23	23
Part 7b. Formula based on 23 (O) inc. Fe2/Fe3 (∑15)
Si	6.77481	7.10435	6.6333	6.56183	6.56283	6.40326	6.46721	6.41504	7.3459	7.72407	7.66188	7.07509	7.11582	7.20761	6.39813	6.43611	6.51248	6.51472	6.57329	6.76934	6.92935	6.98684	6.85595	6.79588	7.35888	7.0373	6.6649	6.6326	6.72756	6.42227	6.45454	6.39971	6.56661	6.46019	6.56043	6.76769	6.81427	6.72793	6.53561	6.51433	6.52607	6.42103	6.44291	6.41314	6.53979	6.50958	6.54021	6.52974	6.49118
Ti	0.0414285	0.0239222	0.0614281	0.0620319	0.0706128	0.0710487	0.0765113	0.0762352	0.017903	0.00583018	0.00826299	0.0279204	0.0209775	0.023344	0.0579024	0.0699511	0.0631567	0.0560429	0.054283	0.0373679	0.0371034	0.0325695	0.0330795	0.0337392	0.0142743	0.0257522	0.0478846	0.0567676	0.0442599	0.0692353	0.0597045	0.0599774	0.0502375	0.0564685	0.0604662	0.0471643	0.0473251	0.0424899	0.06136	0.0586823	0.0644178	0.0681666	0.0759448	0.0670647	0.0602216	0.0526292	0.0493356	0.0572596	0.0606347
Al	1.67561	1.22029	1.93152	1.86434	1.95379	2.30006	2.26674	2.31245	0.883077	0.433298	0.501883	1.3321	1.25555	1.1215	2.11294	2.09039	2.06494	1.97738	1.8529	1.63054	1.45051	1.38503	1.50295	1.54171	0.876672	1.33624	1.85477	1.87821	1.66551	2.15734	2.07978	2.12889	1.85913	1.89233	1.86441	1.71728	1.67776	1.68094	1.96843	2.05066	1.9777	2.21735	2.12871	2.20913	2.02379	2.09076	2.13456	2.12412	2.07818
Cr	0	0	0	0	0	0	0	0	0	0	0	0	0	0	0	0	0	0	0	0	0	0	0	0	0	0	0	0	0	0	0	0	0	0	0	0	0	0	0	0	0	0	0	0	0	0	0	0	0
Fe3+	0.207317	0.150162	0.114718	0.301428	0.199064	0	0	0	0.128709	0.00222221	0.0346817	0.0958169	0.0983394	0.0801129	0.355664	0.262488	0.163727	0.323336	0.368277	0.268332	0.196778	0.193153	0.26876	0.339912	0.144239	0.169791	0.164115	0.198698	0.330244	0.179715	0.251077	0.311901	0.351889	0.529964	0.322047	0.0720202	0.043876	0.252093	0.222717	0.200439	0.251636	0.151368	0.182529	0.145459	0.0984935	0.127734	0.0716093	0.0339316	0.168084
Fe2+	1.6432	1.43729	1.7554	1.65257	1.66592	2.02802	1.94777	1.93895	1.33482	1.24669	1.27321	1.57699	1.5418	1.50408	1.64245	1.67361	1.84509	1.68359	1.64029	1.60725	1.50584	1.47117	1.45037	1.49725	1.32632	1.5609	1.75709	1.72913	1.59943	1.81844	1.80624	1.71981	1.70737	1.60226	1.78127	1.69536	1.71499	1.59646	1.66185	1.70168	1.63282	1.7258	1.69514	1.74224	1.29369	1.24731	1.34415	1.39631	1.26253
Mn	0.0509613	0.0582396	0.0345038	0.0451357	0.0581207	0.0410636	0.0639517	0.042605	0.0380016	0.0438632	0.0458846	0.0477021	0.0460877	0.0326176	0.046122	0.0486072	0.0562842	0.0499088	0.0517917	0.0432313	0.0412301	0.0594315	0.0353461	0.0588326	0.0469615	0.0511066	0.0470134	0.0547465	0.0536398	0.0451188	0.0446129	0.0433402	0.0439734	0.0323973	0.0355038	0.0461112	0.0459257	0.0517925	0.0537982	0.051573	0.0537661	0.0499984	0.0502205	0.0470397	0.0513851	0.0342054	0.035209	0.0437531	0.0404712
Mg	2.68048	3.11098	2.55553	2.58172	2.5389	2.34587	2.36054	2.36846	3.27036	3.57322	3.54472	2.97931	3.05283	3.17548	2.44675	2.54027	2.43331	2.4705	2.51238	2.76703	2.92553	2.93332	2.92258	2.80696	3.23207	2.86969	2.55223	2.54582	2.63885	2.43152	2.36738	2.40196	2.4626	2.43917	2.41628	2.78364	2.79869	2.80476	2.57305	2.56361	2.58609	2.5139	2.53716	2.51243	2.99954	3.02759	2.92642	2.92664	3.01121
Ni	0	0	0	0	0	0	0	0	0	0	0	0	0	0	0	0	0	0	0	0	0	0	0	0	0	0	0	0	0	0	0	0	0	0	0	0	0	0	0	0	0	0	0	0	0	0	0	0	0
Zn	0	0	0	0	0	0	0	0	0	0	0	0	0	0	0	0	0	0	0	0	0	0	0	0	0	0	0	0	0	0	0	0	0	0	0	0	0	0	0	0	0	0	0	0	0	0	0	0	0
Li	0	0	0	0	0	0	0	0	0	0	0	0	0	0	0	0	0	0	0	0	0	0	0	0	0	0	0	0	0	0	0	0	0	0	0	0	0	0	0	0	0	0	0	0	0	0	0	0	0
Ca	1.9262	1.89478	1.9136	1.93094	1.95078	1.81044	1.78247	1.80752	1.98123	1.97081	1.92948	1.86507	1.8686	1.85526	1.94004	1.87856	1.86101	1.92452	1.94679	1.87692	1.91366	1.93848	1.93097	1.92571	2.00057	1.94922	1.91198	1.90403	1.94051	1.87637	1.93667	1.93442	1.9582	1.98722	1.9596	1.87074	1.85717	1.84354	1.92319	1.85903	1.90751	1.85239	1.88738	1.8635	1.93309	1.91019	1.89851	1.88824	1.88772
Na	0.292241	0.263372	0.362458	0.37279	0.34493	0.480682	0.429144	0.486598	0.183835	0.0751141	0.0935461	0.276054	0.277438	0.237711	0.36267	0.389126	0.358841	0.323087	0.302791	0.32292	0.276372	0.254083	0.307067	0.317145	0.167436	0.254286	0.332906	0.328525	0.287658	0.386552	0.3907	0.35732	0.323755	0.311433	0.348544	0.358402	0.351951	0.345852	0.375176	0.372357	0.367576	0.390827	0.39713	0.413331	0.530848	0.540013	0.475147	0.545797	0.521512
K	0.192358	0.109643	0.201839	0.213714	0.235343	0.2711	0.286289	0.295874	0.0767773	0.0295736	0.0296055	0.0900087	0.0950826	0.0987684	0.256655	0.245872	0.261226	0.234658	0.220887	0.164801	0.143438	0.128908	0.143161	0.141985	0.0653376	0.113572	0.222626	0.215837	0.172956	0.29339	0.249958	0.282524	0.231533	0.232959	0.223206	0.222597	0.203232	0.18028	0.239737	0.230524	0.222119	0.262061	0.253917	0.271675	0.146841	0.117077	0.139595	0.122162	0.128597
Ba	0	0	0	0	0	0	0	0	0	0	0	0	0	0	0	0	0	0	0	0	0	0	0	0	0	0	0	0	0	0	0	0	0	0	0	0	0	0	0	0	0	0	0	0	0	0	0	0	0
Sr	0	0	0	0	0	0	0	0	0	0	0	0	0	0	0	0	0	0	0	0	0	0	0	0	0	0	0	0	0	0	0	0	0	0	0	0	0	0	0	0	0	0	0	0	0	0	0	0	0
Pb	0	0	0	0	0	0	0	0	0	0	0	0	0	0	0	0	0	0	0	0	0	0	0	0	0	0	0	0	0	0	0	0	0	0	0	0	0	0	0	0	0	0	0	0	0	0	0	0	0
F	0	0	0	0	0	0	0	0	0	0	0	0	0	0	0	0	0	0	0	0	0	0	0	0	0	0	0	0	0	0	0	0	0	0	0	0	0	0	0	0	0	0	0	0	0	0	0	0	0
Cl	0	0	0	0	0	0	0	0	0	0	0	0	0	0	0	0	0	0	0	0	0	0	0	0	0	0	0	0	0	0	0	0	0	0	0	0	0	0	0	0	0	0	0	0	0	0	0	0	0
OE FM	23	23	23	23	23	23	23	23	23	23	23	23	23	23	23	23	23	23	23	23	23	23	23	23	23	23	23	23	23	23	23	23	23	23	23	23	23	23	23	23	23	23	23	23	23	23	23	23	23
Part 8. Select either ∑13 or ∑15
Si	6.73656	7.04731	6.58951	6.52716	6.53807	6.31134	6.37757	6.34006	7.33531	7.70676	7.62054	7.00241	7.04461	7.12825	6.36876	6.37654	6.44359	6.47712	6.54649	6.70584	6.88363	6.95393	6.81974	6.75727	7.35921	7.00992	6.62008	6.58399	6.69691	6.36177	6.42325	6.36758	6.54556	6.45384	6.5401	6.70106	6.74021	6.64792	6.49722	6.44444	6.47996	6.34894	6.38758	6.3465	6.5063	6.46491	6.48955	6.47408	6.4356
Ti	0.0411946	0.0237301	0.0610225	0.0617041	0.0703465	0.0700288	0.0754508	0.0753441	0.0178772	0.00581712	0.00821841	0.0276336	0.0207676	0.023087	0.0576366	0.0693037	0.0624886	0.0557193	0.0540617	0.0370174	0.0368586	0.032416	0.0329048	0.0335475	0.0142749	0.025652	0.0475625	0.0563516	0.0440583	0.0685831	0.0594151	0.0596763	0.0500765	0.056413	0.0602789	0.0467	0.0468108	0.0419846	0.0609995	0.0580528	0.0639627	0.0674013	0.0752926	0.0663679	0.0599133	0.0522681	0.0489534	0.0567715	0.0601155
Al	1.66615	1.21049	1.91877	1.85449	1.94642	2.26705	2.23532	2.28542	0.881804	0.432327	0.499176	1.31842	1.24299	1.10915	2.10324	2.07105	2.0431	1.96597	1.84535	1.61525	1.44094	1.37851	1.49501	1.53295	0.876711	1.33105	1.8423	1.86444	1.65792	2.13702	2.0697	2.1182	1.85317	1.89047	1.85863	1.70037	1.65953	1.66095	1.95687	2.02866	1.96373	2.19245	2.11043	2.18618	2.01343	2.07641	2.11803	2.10601	2.06038
Cr	0	0	0	0	0	0	0	0	0	0	0	0	0	0	0	0	0	0	0	0	0	0	0	0	0	0	0	0	0	0	0	0	0	0	0	0	0	0	0	0	0	0	0	0	0	0	0	0	0
Fe3+	0.465815	0.518284	0.417674	0.54291	0.371827	0.660317	0.637579	0.537666	0.194847	0.10526	0.282667	0.567385	0.557664	0.585753	0.565235	0.685787	0.648589	0.587014	0.554293	0.697257	0.498987	0.408918	0.510309	0.59935	0.142228	0.348123	0.472371	0.534354	0.53827	0.61136	0.472859	0.541231	0.498201	0.574625	0.463577	0.524179	0.543299	0.796152	0.491612	0.691761	0.574831	0.666116	0.576028	0.621924	0.333542	0.442481	0.427379	0.425721	0.560541
Fe2+	1.37425	1.05642	1.44009	1.40076	1.48612	1.33859	1.28319	1.37862	1.26657	1.14085	1.01816	1.08824	1.06606	0.980998	1.42371	1.2324	1.33898	1.40833	1.44609	1.16073	1.1924	1.24757	1.19974	1.22738	1.3284	1.37583	1.43592	1.37935	1.38261	1.36797	1.57448	1.48028	1.55446	1.55551	1.63322	1.2258	1.19645	1.03041	1.38189	1.18995	1.29631	1.18997	1.28552	1.24616	1.05151	0.923131	0.977409	0.992335	0.85782
Mn	0.0506737	0.057772	0.034276	0.0448972	0.0579015	0.0404742	0.0630653	0.042107	0.0379468	0.043765	0.045637	0.047212	0.0456265	0.0322584	0.0459103	0.0481573	0.0556888	0.0496207	0.0515805	0.0428259	0.040958	0.0591515	0.0351594	0.0584983	0.0469636	0.0509078	0.0466973	0.0543453	0.0533955	0.0446938	0.0443966	0.0431227	0.0438325	0.0323655	0.0353938	0.0456572	0.0454266	0.0511766	0.0534822	0.0510197	0.0533863	0.049437	0.0497892	0.0465509	0.0511219	0.0339707	0.0349362	0.0433802	0.0401246
Mg	2.66535	3.086	2.53866	2.56808	2.52932	2.3122	2.32782	2.34078	3.26565	3.56521	3.5256	2.94871	3.02228	3.14051	2.43551	2.51676	2.40757	2.45623	2.50213	2.74108	2.90623	2.9195	2.90714	2.79101	3.23222	2.85852	2.53507	2.52717	2.62683	2.40861	2.3559	2.38991	2.4547	2.43677	2.4088	2.75623	2.76827	2.77141	2.55793	2.53611	2.56782	2.48568	2.51537	2.48632	2.98418	3.00682	2.90375	2.9017	2.98542
Ni	0	0	0	0	0	0	0	0	0	0	0	0	0	0	0	0	0	0	0	0	0	0	0	0	0	0	0	0	0	0	0	0	0	0	0	0	0	0	0	0	0	0	0	0	0	0	0	0	0
Zn	0	0	0	0	0	0	0	0	0	0	0	0	0	0	0	0	0	0	0	0	0	0	0	0	0	0	0	0	0	0	0	0	0	0	0	0	0	0	0	0	0	0	0	0	0	0	0	0	0
Li	0	0	0	0	0	0	0	0	0	0	0	0	0	0	0	0	0	0	0	0	0	0	0	0	0	0	0	0	0	0	0	0	0	0	0	0	0	0	0	0	0	0	0	0	0	0	0	0	0
Ca	1.91533	1.87957	1.90096	1.92074	1.94342	1.78445	1.75777	1.78639	1.97837	1.9664	1.91907	1.84591	1.8499	1.83483	1.93113	1.86118	1.84133	1.91341	1.93885	1.85931	1.90103	1.92935	1.92077	1.91477	2.00066	1.94163	1.89912	1.89007	1.93168	1.85869	1.92728	1.92471	1.95192	1.98527	1.95352	1.85233	1.83699	1.82161	1.91189	1.83909	1.89403	1.83159	1.87117	1.84414	1.92319	1.89708	1.88381	1.87215	1.87156
Na	0.290591	0.261258	0.360064	0.37082	0.343629	0.473782	0.423196	0.48091	0.183569	0.0749458	0.0930414	0.273218	0.274662	0.235093	0.361005	0.385524	0.355045	0.321222	0.301557	0.319891	0.274549	0.252886	0.305445	0.315343	0.167443	0.253296	0.330668	0.326117	0.286348	0.382911	0.388806	0.355527	0.322717	0.311127	0.347464	0.354873	0.348126	0.341739	0.372972	0.368363	0.364979	0.386439	0.393719	0.409037	0.528129	0.536307	0.471467	0.541145	0.517047
K	0.191272	0.108763	0.200506	0.212584	0.234455	0.267208	0.282321	0.292416	0.0766666	0.0295074	0.0294458	0.089084	0.0941311	0.0976808	0.255477	0.243597	0.258462	0.233303	0.219987	0.163255	0.142491	0.128301	0.142405	0.141178	0.0653405	0.113131	0.221129	0.214255	0.172168	0.290626	0.248747	0.281106	0.230791	0.23273	0.222514	0.220405	0.201023	0.178136	0.238329	0.228051	0.220549	0.259119	0.251736	0.268852	0.146089	0.116273	0.138514	0.121121	0.127496
Ba	0	0	0	0	0	0	0	0	0	0	0	0	0	0	0	0	0	0	0	0	0	0	0	0	0	0	0	0	0	0	0	0	0	0	0	0	0	0	0	0	0	0	0	0	0	0	0	0	0
Sr	0	0	0	0	0	0	0	0	0	0	0	0	0	0	0	0	0	0	0	0	0	0	0	0	0	0	0	0	0	0	0	0	0	0	0	0	0	0	0	0	0	0	0	0	0	0	0	0	0
Pb	0	0	0	0	0	0	0	0	0	0	0	0	0	0	0	0	0	0	0	0	0	0	0	0	0	0	0	0	0	0	0	0	0	0	0	0	0	0	0	0	0	0	0	0	0	0	0	0	0
F	0	0	0	0	0	0	0	0	0	0	0	0	0	0	0	0	0	0	0	0	0	0	0	0	0	0	0	0	0	0	0	0	0	0	0	0	0	0	0	0	0	0	0	0	0	0	0	0	0
Cl	0	0	0	0	0	0	0	0	0	0	0	0	0	0	0	0	0	0	0	0	0	0	0	0	0	0	0	0	0	0	0	0	0	0	0	0	0	0	0	0	0	0	0	0	0	0	0	0	0
OE FM	23	23	23	23	23	23	23	23	23	23	23	23	23	23	23	23	23	23	23	23	23	23	23	23	23	23	23	23	23	23	23	23	23	23	23	23	23	23	23	23	23	23	23	23	23	23	23	23	23
Part 9. Iron oxide, water and site allocation calcs.
FeO calc	11.267	8.77308	11.6893	11.3915	12.1476	10.8194	10.4584	11.1353	10.4763	9.63137	8.61357	9.03233	8.96641	8.2514	11.3132	10.0877	11.0607	11.2941	11.7384	9.56934	9.94555	10.1979	9.94983	10.0301	11.0067	11.3705	11.7442	11.2723	11.2875	11.1661	12.6325	11.8069	12.4887	12.1351	13.1841	9.94409	9.86465	8.53631	11.2659	9.87647	10.5872	9.79302	10.5071	10.2243	8.60164	7.61549	7.95376	8.22248	7.14761
Fe2O3 calc	4.24412	4.78316	3.76762	4.90653	3.3776	5.93114	5.77485	4.82614	1.79102	0.987531	2.65749	5.23341	5.21243	5.47526	4.99142	6.23822	5.95402	5.23154	5.00018	6.38815	4.62517	3.71462	4.70322	5.44302	1.30961	3.19725	4.29348	4.85286	4.88347	5.54568	4.21615	4.79739	4.4481	4.98179	4.15871	4.72559	4.97802	7.32968	4.45397	6.38056	5.21729	6.09201	5.23214	5.67057	3.03214	4.05659	3.86492	3.92013	5.19043
H2O - ∑13	2.05587	2.08242	2.03541	2.03924	2.04969	2.02678	2.04375	2.02539	2.0741	2.11695	2.12138	2.08127	2.10907	2.10918	1.99259	2.05255	2.07139	2.01096	2.03548	2.0673	2.09151	2.04974	2.07962	2.04919	2.07768	2.07236	2.05092	2.04923	2.04716	2.04682	2.0119	2.00007	2.01461	1.95624	2.02423	2.03422	2.06747	2.07736	2.04431	2.08126	2.04798	2.06363	2.04955	2.05737	2.05126	2.06865	2.04056	2.07777	2.08938
H2O - ∑15	2.04427	2.0657	2.02197	2.02847	2.04196	1.99769	2.01543	2.00172	2.07111	2.11221	2.10994	2.05989	2.08796	2.08595	1.98344	2.03355	2.04948	1.99935	2.02719	2.04791	2.07771	2.04009	2.06863	2.03755	2.07778	2.0643	2.03712	2.03421	2.03783	2.02754	2.00214	1.99003	2.00816	1.95432	2.01795	2.0142	2.045	2.05265	2.0323	2.05893	2.03352	2.04047	2.03194	2.03599	2.04076	2.05446	2.02475	2.06006	2.07149
Site Allocation
Mg+Ni+Li	2.66535	3.086	2.53866	2.56808	2.52932	2.3122	2.32782	2.34078	3.26565	3.56521	3.5256	2.94871	3.02228	3.14051	2.43551	2.51676	2.40757	2.45623	2.50213	2.74108	2.90623	2.9195	2.90714	2.79101	3.23222	2.85852	2.53507	2.52717	2.62683	2.40861	2.3559	2.38991	2.4547	2.43677	2.4088	2.75623	2.76827	2.77141	2.55793	2.53611	2.56782	2.48568	2.51537	2.48632	2.98418	3.00682	2.90375	2.9017	2.98542
Mn+Zn	0.0506737	0.057772	0.034276	0.0448972	0.0579015	0.0404742	0.0630653	0.042107	0.0379468	0.043765	0.045637	0.047212	0.0456265	0.0322584	0.0459103	0.0481573	0.0556888	0.0496207	0.0515805	0.0428259	0.040958	0.0591515	0.0351594	0.0584983	0.0469636	0.0509078	0.0466973	0.0543453	0.0533955	0.0446938	0.0443966	0.0431227	0.0438325	0.0323655	0.0353938	0.0456572	0.0454266	0.0511766	0.0534822	0.0510197	0.0533863	0.049437	0.0497892	0.0465509	0.0511219	0.0339707	0.0349362	0.0433802	0.0401246
Ca+Sr	1.91533	1.87957	1.90096	1.92074	1.94342	1.78445	1.75777	1.78639	1.97837	1.9664	1.91907	1.84591	1.8499	1.83483	1.93113	1.86118	1.84133	1.91341	1.93885	1.85931	1.90103	1.92935	1.92077	1.91477	2.00066	1.94163	1.89912	1.89007	1.93168	1.85869	1.92728	1.92471	1.95192	1.98527	1.95352	1.85233	1.83699	1.82161	1.91189	1.83909	1.89403	1.83159	1.87117	1.84414	1.92319	1.89708	1.88381	1.87215	1.87156
K+Ba	0.191272	0.108763	0.200506	0.212584	0.234455	0.267208	0.282321	0.292416	0.0766666	0.0295074	0.0294458	0.089084	0.0941311	0.0976808	0.255477	0.243597	0.258462	0.233303	0.219987	0.163255	0.142491	0.128301	0.142405	0.141178	0.0653405	0.113131	0.221129	0.214255	0.172168	0.290626	0.248747	0.281106	0.230791	0.23273	0.222514	0.220405	0.201023	0.178136	0.238329	0.228051	0.220549	0.259119	0.251736	0.268852	0.146089	0.116273	0.138514	0.121121	0.127496
Al iv (1)	1.26344	0.952694	1.41049	1.47284	1.46193	1.68866	1.62243	1.65994	0.664694	0.293236	0.379457	0.997593	0.955388	0.871754	1.63124	1.62346	1.55641	1.52288	1.45351	1.29416	1.11637	1.04607	1.18026	1.24273	0.640794	0.990082	1.37992	1.41601	1.30309	1.63823	1.57675	1.63242	1.45444	1.54616	1.4599	1.29894	1.25979	1.35208	1.50278	1.55556	1.52004	1.65106	1.61242	1.6535	1.4937	1.53509	1.51045	1.52592	1.5644
Al iv (2)	1.26344	0.952694	1.41049	1.47284	1.46193	1.68866	1.62243	1.65994	0.664694	0.293236	0.379457	0.997593	0.955388	0.871754	1.63124	1.62346	1.55641	1.52288	1.45351	1.29416	1.11637	1.04607	1.18026	1.24273	0.640794	0.990082	1.37992	1.41601	1.30309	1.63823	1.57675	1.63242	1.45444	1.54616	1.4599	1.29894	1.25979	1.35208	1.50278	1.55556	1.52004	1.65106	1.61242	1.6535	1.4937	1.53509	1.51045	1.52592	1.5644
Al vi	0.402717	0.257795	0.508277	0.381648	0.484486	0.578389	0.612895	0.62548	0.21711	0.139091	0.119718	0.320825	0.287597	0.237394	0.471995	0.447591	0.486684	0.443086	0.391841	0.321092	0.324565	0.33244	0.314749	0.290223	0.235917	0.340963	0.462382	0.448434	0.354834	0.498782	0.492947	0.485784	0.398731	0.344314	0.398736	0.401432	0.399739	0.308865	0.454087	0.473105	0.44369	0.541394	0.498006	0.532678	0.519732	0.541329	0.607572	0.580094	0.495978
Limit Si max =8	6.73656	7.04731	6.58951	6.52716	6.53807	6.31134	6.37757	6.34006	7.33531	7.70676	7.62054	7.00241	7.04461	7.12825	6.36876	6.37654	6.44359	6.47712	6.54649	6.70584	6.88363	6.95393	6.81974	6.75727	7.35921	7.00992	6.62008	6.58399	6.69691	6.36177	6.42325	6.36758	6.54556	6.45384	6.5401	6.70106	6.74021	6.64792	6.49722	6.44444	6.47996	6.34894	6.38758	6.3465	6.5063	6.46491	6.48955	6.47408	6.4356
Total T site (Si max)	8.90973	8.79981	8.98697	8.98626	8.92666	9.30873	9.32592	9.23849	8.42983	8.25017	8.4106	8.91584	8.86603	8.84623	9.09487	9.20268	9.19776	9.08582	9.0002	9.05537	8.86041	8.77377	8.85796	8.92312	8.39242	8.71474	8.98232	9.03914	8.93716	9.17873	9.02522	9.08669	8.94701	8.97535	8.92259	8.97231	8.98985	9.147	9.0067	9.22292	9.08248	9.27491	9.14933	9.22097	8.91319	9.03608	9.08391	9.06259	9.11663
Excess T if T>8	0.909726	0.799809	0.986973	0.986262	0.92666	1.30873	1.32592	1.23849	0.429834	0.250168	0.410603	0.915843	0.866029	0.846234	1.09487	1.20268	1.19776	1.08582	1.0002	1.05537	0.860411	0.773774	0.857963	0.92312	0.392419	0.714738	0.982315	1.03914	0.937162	1.17873	1.02522	1.08669	0.947009	0.975352	0.922591	0.972311	0.989849	1.147	1.0067	1.22292	1.08248	1.27491	1.14933	1.22097	0.913186	1.03608	1.08391	1.06259	1.11663
Limit XsT max =5	0.909726	0.799809	0.986973	0.986262	0.92666	1.30873	1.32592	1.23849	0.429834	0.250168	0.410603	0.915843	0.866029	0.846234	1.09487	1.20268	1.19776	1.08582	1.0002	1.05537	0.860411	0.773774	0.857963	0.92312	0.392419	0.714738	0.982315	1.03914	0.937162	1.17873	1.02522	1.08669	0.947009	0.975352	0.922591	0.972311	0.989849	1.147	1.0067	1.22292	1.08248	1.27491	1.14933	1.22097	0.913186	1.03608	1.08391	1.06259	1.11663
Total C site (T max)	5	5	5	5	5	5	5	5	5	5	5	5	5	5	5	5	5	5	5	5	5	5	5	5	5	5	5	5	5	5	5	5	5	5	5	5	5	5	5	5	5	5	5	5	5	5	5	5	5
Excess C if C>5	0	0	0	0	0	0	0	0	0	0	0	0	0	0	0	0	0	0	0	0	0	0	0	0	0	0	0	0	0	0	0	0	0	0	0	0	0	0	0	0	0	0	0	0	0	0	0	0	0
Limit XsC max =2	0	0	0	0	0	0	0	0	0	0	0	0	0	0	0	0	0	0	0	0	0	0	0	0	0	0	0	0	0	0	0	0	0	0	0	0	0	0	0	0	0	0	0	0	0	0	0	0	0
Total B site (C max)	2.20592	2.14082	2.26103	2.29156	2.28705	2.25823	2.18096	2.2673	2.16194	2.04135	2.01212	2.11912	2.12456	2.06992	2.29213	2.2467	2.19637	2.23463	2.24041	2.1792	2.17558	2.18223	2.22622	2.23011	2.1681	2.19493	2.22979	2.21619	2.21802	2.2416	2.31609	2.28023	2.27464	2.29639	2.30099	2.2072	2.18511	2.16335	2.28486	2.20745	2.25901	2.21803	2.26489	2.25317	2.45132	2.43339	2.35527	2.41329	2.3886
Excess B if B>2	0.205917	0.140825	0.261028	0.291556	0.287048	0.258234	0.180964	0.267301	0.161942	0.041345	0.0121157	0.119125	0.124562	0.0699231	0.292134	0.2467	0.196373	0.234632	0.24041	0.179204	0.175579	0.182232	0.226216	0.230113	0.168101	0.194929	0.229789	0.216189	0.218023	0.241605	0.316089	0.280235	0.274639	0.296394	0.300987	0.207199	0.185115	0.163351	0.284862	0.207448	0.25901	0.218033	0.264893	0.253175	0.451319	0.433386	0.355274	0.413293	0.388602
Excess B restricted to Na	0.205917	0.140825	0.261028	0.291556	0.287048	0.258234	0.180964	0.267301	0.161942	0.041345	0.0121157	0.119125	0.124562	0.0699231	0.292134	0.2467	0.196373	0.234632	0.24041	0.179204	0.175579	0.182232	0.226216	0.230113	0.167443	0.194929	0.229789	0.216189	0.218023	0.241605	0.316089	0.280235	0.274639	0.296394	0.300987	0.207199	0.185115	0.163351	0.284862	0.207448	0.25901	0.218033	0.264893	0.253175	0.451319	0.433386	0.355274	0.413293	0.388602
Total A site (No Ca)	0.39719	0.249588	0.461534	0.504141	0.521503	0.525442	0.463285	0.559717	0.238609	0.0708524	0.0415615	0.208209	0.218693	0.167604	0.547611	0.490296	0.454835	0.467935	0.460397	0.342459	0.31807	0.310532	0.368621	0.371292	0.232784	0.30806	0.450919	0.430444	0.390191	0.532231	0.564835	0.56134	0.50543	0.529124	0.523502	0.427604	0.386138	0.341487	0.523191	0.435499	0.479559	0.477152	0.51663	0.522026	0.597408	0.54966	0.493787	0.534414	0.516098
Excess Na in A	0	0	0	0	0	0	0	0	0	0	0	0	0	0	0	0	0	0	0	0	0	0	0	0	0	0	0	0	0	0	0	0	0	0	0	0	0	0	0	0	0	0	0	0	0	0	0	0	0
Excess Na if K>1	0	0	0	0	0	0	0	0	0	0	0	0	0	0	0	0	0	0	0	0	0	0	0	0	0	0	0	0	0	0	0	0	0	0	0	0	0	0	0	0	0	0	0	0	0	0	0	0	0
Set (Na+K)A to max 1	0.39719	0.249588	0.461534	0.504141	0.521503	0.525442	0.463285	0.559717	0.238609	0.0708524	0.0415615	0.208209	0.218693	0.167604	0.547611	0.490296	0.454835	0.467935	0.460397	0.342459	0.31807	0.310532	0.368621	0.371292	0.232784	0.30806	0.450919	0.430444	0.390191	0.532231	0.564835	0.56134	0.50543	0.529124	0.523502	0.427604	0.386138	0.341487	0.523191	0.435499	0.479559	0.477152	0.51663	0.522026	0.597408	0.54966	0.493787	0.534414	0.516098
If K>1 set (Na+K)A=KA	0.39719	0.249588	0.461534	0.504141	0.521503	0.525442	0.463285	0.559717	0.238609	0.0708524	0.0415615	0.208209	0.218693	0.167604	0.547611	0.490296	0.454835	0.467935	0.460397	0.342459	0.31807	0.310532	0.368621	0.371292	0.232784	0.30806	0.450919	0.430444	0.390191	0.532231	0.564835	0.56134	0.50543	0.529124	0.523502	0.427604	0.386138	0.341487	0.523191	0.435499	0.479559	0.477152	0.51663	0.522026	0.597408	0.54966	0.493787	0.534414	0.516098
Na(B)	0.0846742	0.120433	0.0990369	0.0792633	0.0565808	0.215548	0.242233	0.21361	0.0216271	0.0336008	0.0809257	0.154093	0.150101	0.16517	0.0688708	0.138824	0.158672	0.0865908	0.061147	0.140687	0.0989701	0.0706548	0.0792291	0.0852291	0	0.0583673	0.100878	0.109928	0.0683248	0.141306	0.072717	0.0752918	0.0480782	0.0147331	0.0464764	0.147674	0.163011	0.178388	0.0881096	0.160915	0.10597	0.168407	0.128826	0.155862	0.0768106	0.102921	0.116193	0.127852	0.128444
(Na+K)A	0.39719	0.249588	0.461534	0.504141	0.521503	0.525442	0.463285	0.559717	0.238609	0.0708524	0.0415615	0.208209	0.218693	0.167604	0.547611	0.490296	0.454835	0.467935	0.460397	0.342459	0.31807	0.310532	0.368621	0.371292	0.232784	0.30806	0.450919	0.430444	0.390191	0.532231	0.564835	0.56134	0.50543	0.529124	0.523502	0.427604	0.386138	0.341487	0.523191	0.435499	0.479559	0.477152	0.51663	0.522026	0.597408	0.54966	0.493787	0.534414	0.516098
(Ca+Na)B	2	2	2	2	2	2	2	2	2	2	2	2	2	2	2	2	2	2	2	2	2	2	2	2	2.00066	2	2	2	2	2	2	2	2	2	2	2	2	2	2	2	2	2	2	2	2	2	2	2	2
Mg/(Mg + Fe2+)	0.659805	0.744975	0.638054	0.647061	0.629899	0.633342	0.644645	0.629342	0.72054	0.757578	0.77592	0.73043	0.739244	0.761981	0.631089	0.671287	0.64261	0.635579	0.633737	0.702515	0.709074	0.700612	0.707872	0.69456	0.708723	0.675078	0.638398	0.646911	0.65516	0.637775	0.599408	0.617517	0.612274	0.610371	0.595939	0.692167	0.698226	0.728968	0.649251	0.680641	0.664527	0.676255	0.661785	0.666131	0.739447	0.765104	0.748166	0.745165	0.776798
Fe3+/(Fe3+ + Al vi)	0.536324	0.667824	0.451075	0.58721	0.434219	0.53307	0.50987	0.462252	0.472978	0.430773	0.702479	0.638796	0.659753	0.711602	0.544946	0.605082	0.571307	0.569861	0.585851	0.684693	0.605896	0.55158	0.618513	0.67375	0.37612	0.505195	0.505343	0.543712	0.602696	0.550705	0.489601	0.526994	0.55545	0.625313	0.537597	0.566306	0.576116	0.720489	0.51984	0.593854	0.564378	0.551644	0.536322	0.538648	0.390897	0.449763	0.412946	0.42326	0.530555
Part 10. Amphibole specific names
tremolite	FALSE	FALSE	FALSE	FALSE	FALSE	FALSE	FALSE	FALSE	FALSE	FALSE	FALSE	FALSE	FALSE	FALSE	FALSE	FALSE	FALSE	FALSE	FALSE	FALSE	FALSE	FALSE	FALSE	FALSE	FALSE	FALSE	FALSE	FALSE	FALSE	FALSE	FALSE	FALSE	FALSE	FALSE	FALSE	FALSE	FALSE	FALSE	FALSE	FALSE	FALSE	FALSE	FALSE	FALSE	FALSE	FALSE	FALSE	FALSE	FALSE
actinolite	FALSE	FALSE	FALSE	FALSE	FALSE	FALSE	FALSE	FALSE	FALSE	actinolite	actinolite	FALSE	FALSE	FALSE	FALSE	FALSE	FALSE	FALSE	FALSE	FALSE	FALSE	FALSE	FALSE	FALSE	FALSE	FALSE	FALSE	FALSE	FALSE	FALSE	FALSE	FALSE	FALSE	FALSE	FALSE	FALSE	FALSE	FALSE	FALSE	FALSE	FALSE	FALSE	FALSE	FALSE	FALSE	FALSE	FALSE	FALSE	FALSE
ferro-actinolite	FALSE	FALSE	FALSE	FALSE	FALSE	FALSE	FALSE	FALSE	FALSE	FALSE	FALSE	FALSE	FALSE	FALSE	FALSE	FALSE	FALSE	FALSE	FALSE	FALSE	FALSE	FALSE	FALSE	FALSE	FALSE	FALSE	FALSE	FALSE	FALSE	FALSE	FALSE	FALSE	FALSE	FALSE	FALSE	FALSE	FALSE	FALSE	FALSE	FALSE	FALSE	FALSE	FALSE	FALSE	FALSE	FALSE	FALSE	FALSE	FALSE
tremolitic hornblende	FALSE	FALSE	FALSE	FALSE	FALSE	FALSE	FALSE	FALSE	FALSE	FALSE	FALSE	FALSE	FALSE	FALSE	FALSE	FALSE	FALSE	FALSE	FALSE	FALSE	FALSE	FALSE	FALSE	FALSE	FALSE	FALSE	FALSE	FALSE	FALSE	FALSE	FALSE	FALSE	FALSE	FALSE	FALSE	FALSE	FALSE	FALSE	FALSE	FALSE	FALSE	FALSE	FALSE	FALSE	FALSE	FALSE	FALSE	FALSE	FALSE
actinolitic hornblende	FALSE	FALSE	FALSE	FALSE	FALSE	FALSE	FALSE	FALSE	actinolitic hornblende	FALSE	FALSE	FALSE	FALSE	FALSE	FALSE	FALSE	FALSE	FALSE	FALSE	FALSE	FALSE	FALSE	FALSE	FALSE	actinolitic hornblende	FALSE	FALSE	FALSE	FALSE	FALSE	FALSE	FALSE	FALSE	FALSE	FALSE	FALSE	FALSE	FALSE	FALSE	FALSE	FALSE	FALSE	FALSE	FALSE	FALSE	FALSE	FALSE	FALSE	FALSE
ferro-actinolitic hornblende	FALSE	FALSE	FALSE	FALSE	FALSE	FALSE	FALSE	FALSE	FALSE	FALSE	FALSE	FALSE	FALSE	FALSE	FALSE	FALSE	FALSE	FALSE	FALSE	FALSE	FALSE	FALSE	FALSE	FALSE	FALSE	FALSE	FALSE	FALSE	FALSE	FALSE	FALSE	FALSE	FALSE	FALSE	FALSE	FALSE	FALSE	FALSE	FALSE	FALSE	FALSE	FALSE	FALSE	FALSE	FALSE	FALSE	FALSE	FALSE	FALSE
magnesio-hornblende	magnesio-hornblende	magnesio-hornblende	magnesio-hornblende	magnesio-hornblende	magnesio-hornblende	FALSE	FALSE	FALSE	FALSE	FALSE	FALSE	magnesio-hornblende	magnesio-hornblende	magnesio-hornblende	FALSE	FALSE	FALSE	FALSE	magnesio-hornblende	magnesio-hornblende	magnesio-hornblende	magnesio-hornblende	magnesio-hornblende	magnesio-hornblende	FALSE	magnesio-hornblende	magnesio-hornblende	magnesio-hornblende	magnesio-hornblende	FALSE	FALSE	FALSE	magnesio-hornblende	FALSE	magnesio-hornblende	magnesio-hornblende	magnesio-hornblende	magnesio-hornblende	FALSE	FALSE	FALSE	FALSE	FALSE	FALSE	magnesio-hornblende	FALSE	FALSE	FALSE	FALSE
ferro-hornblende	FALSE	FALSE	FALSE	FALSE	FALSE	FALSE	FALSE	FALSE	FALSE	FALSE	FALSE	FALSE	FALSE	FALSE	FALSE	FALSE	FALSE	FALSE	FALSE	FALSE	FALSE	FALSE	FALSE	FALSE	FALSE	FALSE	FALSE	FALSE	FALSE	FALSE	FALSE	FALSE	FALSE	FALSE	FALSE	FALSE	FALSE	FALSE	FALSE	FALSE	FALSE	FALSE	FALSE	FALSE	FALSE	FALSE	FALSE	FALSE	FALSE
tschermakitic hornblende	FALSE	FALSE	FALSE	FALSE	FALSE	tschermakitic hornblende	tschermakitic hornblende	tschermakitic hornblende	FALSE	FALSE	FALSE	FALSE	FALSE	FALSE	tschermakitic hornblende	tschermakitic hornblende	tschermakitic hornblende	tschermakitic hornblende	FALSE	FALSE	FALSE	FALSE	FALSE	FALSE	FALSE	FALSE	FALSE	FALSE	FALSE	tschermakitic hornblende	tschermakitic hornblende	tschermakitic hornblende	FALSE	tschermakitic hornblende	FALSE	FALSE	FALSE	FALSE	tschermakitic hornblende	tschermakitic hornblende	tschermakitic hornblende	tschermakitic hornblende	tschermakitic hornblende	tschermakitic hornblende	FALSE	tschermakitic hornblende	tschermakitic hornblende	tschermakitic hornblende	tschermakitic hornblende
ferro-tschermakitic hornblende	FALSE	FALSE	FALSE	FALSE	FALSE	FALSE	FALSE	FALSE	FALSE	FALSE	FALSE	FALSE	FALSE	FALSE	FALSE	FALSE	FALSE	FALSE	FALSE	FALSE	FALSE	FALSE	FALSE	FALSE	FALSE	FALSE	FALSE	FALSE	FALSE	FALSE	FALSE	FALSE	FALSE	FALSE	FALSE	FALSE	FALSE	FALSE	FALSE	FALSE	FALSE	FALSE	FALSE	FALSE	FALSE	FALSE	FALSE	FALSE	FALSE
tschermakite	FALSE	FALSE	FALSE	FALSE	FALSE	FALSE	FALSE	FALSE	FALSE	FALSE	FALSE	FALSE	FALSE	FALSE	FALSE	FALSE	FALSE	FALSE	FALSE	FALSE	FALSE	FALSE	FALSE	FALSE	FALSE	FALSE	FALSE	FALSE	FALSE	FALSE	FALSE	FALSE	FALSE	FALSE	FALSE	FALSE	FALSE	FALSE	FALSE	FALSE	FALSE	FALSE	FALSE	FALSE	FALSE	FALSE	FALSE	FALSE	FALSE
ferro-tschermakite	FALSE	FALSE	FALSE	FALSE	FALSE	FALSE	FALSE	FALSE	FALSE	FALSE	FALSE	FALSE	FALSE	FALSE	FALSE	FALSE	FALSE	FALSE	FALSE	FALSE	FALSE	FALSE	FALSE	FALSE	FALSE	FALSE	FALSE	FALSE	FALSE	FALSE	FALSE	FALSE	FALSE	FALSE	FALSE	FALSE	FALSE	FALSE	FALSE	FALSE	FALSE	FALSE	FALSE	FALSE	FALSE	FALSE	FALSE	FALSE	FALSE
subsilicic-tschermakite	FALSE	FALSE	FALSE	FALSE	FALSE	FALSE	FALSE	FALSE	FALSE	FALSE	FALSE	FALSE	FALSE	FALSE	FALSE	FALSE	FALSE	FALSE	FALSE	FALSE	FALSE	FALSE	FALSE	FALSE	FALSE	FALSE	FALSE	FALSE	FALSE	FALSE	FALSE	FALSE	FALSE	FALSE	FALSE	FALSE	FALSE	FALSE	FALSE	FALSE	FALSE	FALSE	FALSE	FALSE	FALSE	FALSE	FALSE	FALSE	FALSE
subsilicic ferro-tschermakite	FALSE	FALSE	FALSE	FALSE	FALSE	FALSE	FALSE	FALSE	FALSE	FALSE	FALSE	FALSE	FALSE	FALSE	FALSE	FALSE	FALSE	FALSE	FALSE	FALSE	FALSE	FALSE	FALSE	FALSE	FALSE	FALSE	FALSE	FALSE	FALSE	FALSE	FALSE	FALSE	FALSE	FALSE	FALSE	FALSE	FALSE	FALSE	FALSE	FALSE	FALSE	FALSE	FALSE	FALSE	FALSE	FALSE	FALSE	FALSE	FALSE
silicic edenite	FALSE	FALSE	FALSE	FALSE	FALSE	FALSE	FALSE	FALSE	silicic edenite	silicic edenite	silicic edenite	FALSE	FALSE	FALSE	FALSE	FALSE	FALSE	FALSE	FALSE	FALSE	FALSE	FALSE	FALSE	FALSE	silicic edenite	FALSE	FALSE	FALSE	FALSE	FALSE	FALSE	FALSE	FALSE	FALSE	FALSE	FALSE	FALSE	FALSE	FALSE	FALSE	FALSE	FALSE	FALSE	FALSE	FALSE	FALSE	FALSE	FALSE	FALSE
silicic ferro-edenite	FALSE	FALSE	FALSE	FALSE	FALSE	FALSE	FALSE	FALSE	FALSE	FALSE	FALSE	FALSE	FALSE	FALSE	FALSE	FALSE	FALSE	FALSE	FALSE	FALSE	FALSE	FALSE	FALSE	FALSE	FALSE	FALSE	FALSE	FALSE	FALSE	FALSE	FALSE	FALSE	FALSE	FALSE	FALSE	FALSE	FALSE	FALSE	FALSE	FALSE	FALSE	FALSE	FALSE	FALSE	FALSE	FALSE	FALSE	FALSE	FALSE
edenite	FALSE	edenite	FALSE	FALSE	FALSE	FALSE	FALSE	FALSE	FALSE	FALSE	FALSE	edenite	edenite	edenite	FALSE	FALSE	FALSE	FALSE	FALSE	FALSE	edenite	edenite	edenite	edenite	FALSE	edenite	FALSE	FALSE	FALSE	FALSE	FALSE	FALSE	FALSE	FALSE	FALSE	FALSE	FALSE	FALSE	FALSE	FALSE	FALSE	FALSE	FALSE	FALSE	FALSE	FALSE	FALSE	FALSE	FALSE
ferro-edenite	FALSE	FALSE	FALSE	FALSE	FALSE	FALSE	FALSE	FALSE	FALSE	FALSE	FALSE	FALSE	FALSE	FALSE	FALSE	FALSE	FALSE	FALSE	FALSE	FALSE	FALSE	FALSE	FALSE	FALSE	FALSE	FALSE	FALSE	FALSE	FALSE	FALSE	FALSE	FALSE	FALSE	FALSE	FALSE	FALSE	FALSE	FALSE	FALSE	FALSE	FALSE	FALSE	FALSE	FALSE	FALSE	FALSE	FALSE	FALSE	FALSE
edenitic hornblende	edenitic hornblende	FALSE	edenitic hornblende	edenitic hornblende	edenitic hornblende	FALSE	FALSE	FALSE	FALSE	FALSE	FALSE	FALSE	FALSE	FALSE	FALSE	FALSE	FALSE	FALSE	edenitic hornblende	edenitic hornblende	FALSE	FALSE	FALSE	FALSE	FALSE	FALSE	edenitic hornblende	edenitic hornblende	edenitic hornblende	FALSE	FALSE	FALSE	edenitic hornblende	FALSE	edenitic hornblende	edenitic hornblende	edenitic hornblende	edenitic hornblende	FALSE	FALSE	FALSE	FALSE	FALSE	FALSE	edenitic hornblende	FALSE	FALSE	FALSE	FALSE
ferro-edenitic hornblende	FALSE	FALSE	FALSE	FALSE	FALSE	FALSE	FALSE	FALSE	FALSE	FALSE	FALSE	FALSE	FALSE	FALSE	FALSE	FALSE	FALSE	FALSE	FALSE	FALSE	FALSE	FALSE	FALSE	FALSE	FALSE	FALSE	FALSE	FALSE	FALSE	FALSE	FALSE	FALSE	FALSE	FALSE	FALSE	FALSE	FALSE	FALSE	FALSE	FALSE	FALSE	FALSE	FALSE	FALSE	FALSE	FALSE	FALSE	FALSE	FALSE
pargasitic hornblende	FALSE	FALSE	FALSE	FALSE	FALSE	FALSE	FALSE	FALSE	FALSE	FALSE	FALSE	FALSE	FALSE	FALSE	FALSE	FALSE	FALSE	FALSE	FALSE	FALSE	FALSE	FALSE	FALSE	FALSE	FALSE	FALSE	FALSE	FALSE	FALSE	FALSE	FALSE	FALSE	FALSE	FALSE	FALSE	FALSE	FALSE	FALSE	FALSE	FALSE	FALSE	FALSE	FALSE	FALSE	FALSE	pargasitic hornblende	pargasitic hornblende	pargasitic hornblende	pargasitic hornblende
ferroan pargasitic hornblende	FALSE	FALSE	FALSE	FALSE	FALSE	ferroan pargasitic hornblende	ferroan pargasitic hornblende	ferroan pargasitic hornblende	FALSE	FALSE	FALSE	FALSE	FALSE	FALSE	ferroan pargasitic hornblende	ferroan pargasitic hornblende	ferroan pargasitic hornblende	ferroan pargasitic hornblende	FALSE	FALSE	FALSE	FALSE	FALSE	FALSE	FALSE	FALSE	FALSE	FALSE	FALSE	ferroan pargasitic hornblende	ferroan pargasitic hornblende	ferroan pargasitic hornblende	FALSE	ferroan pargasitic hornblende	FALSE	FALSE	FALSE	FALSE	ferroan pargasitic hornblende	ferroan pargasitic hornblende	ferroan pargasitic hornblende	ferroan pargasitic hornblende	ferroan pargasitic hornblende	ferroan pargasitic hornblende	FALSE	FALSE	FALSE	FALSE	FALSE
ferro-pargasitic hornblende	FALSE	FALSE	FALSE	FALSE	FALSE	FALSE	FALSE	FALSE	FALSE	FALSE	FALSE	FALSE	FALSE	FALSE	FALSE	FALSE	FALSE	FALSE	FALSE	FALSE	FALSE	FALSE	FALSE	FALSE	FALSE	FALSE	FALSE	FALSE	FALSE	FALSE	FALSE	FALSE	FALSE	FALSE	FALSE	FALSE	FALSE	FALSE	FALSE	FALSE	FALSE	FALSE	FALSE	FALSE	FALSE	FALSE	FALSE	FALSE	FALSE
pargasite	FALSE	FALSE	FALSE	FALSE	FALSE	FALSE	FALSE	FALSE	FALSE	FALSE	FALSE	FALSE	FALSE	FALSE	FALSE	FALSE	FALSE	FALSE	FALSE	FALSE	FALSE	FALSE	FALSE	FALSE	FALSE	FALSE	FALSE	FALSE	FALSE	FALSE	FALSE	FALSE	FALSE	FALSE	FALSE	FALSE	FALSE	FALSE	FALSE	FALSE	FALSE	FALSE	FALSE	FALSE	FALSE	FALSE	FALSE	FALSE	FALSE
ferroan pargasite	FALSE	FALSE	FALSE	FALSE	FALSE	FALSE	FALSE	FALSE	FALSE	FALSE	FALSE	FALSE	FALSE	FALSE	FALSE	FALSE	FALSE	FALSE	FALSE	FALSE	FALSE	FALSE	FALSE	FALSE	FALSE	FALSE	FALSE	FALSE	FALSE	FALSE	FALSE	FALSE	FALSE	FALSE	FALSE	FALSE	FALSE	FALSE	FALSE	FALSE	FALSE	FALSE	FALSE	FALSE	FALSE	FALSE	FALSE	FALSE	FALSE
ferro-pargasite	FALSE	FALSE	FALSE	FALSE	FALSE	FALSE	FALSE	FALSE	FALSE	FALSE	FALSE	FALSE	FALSE	FALSE	FALSE	FALSE	FALSE	FALSE	FALSE	FALSE	FALSE	FALSE	FALSE	FALSE	FALSE	FALSE	FALSE	FALSE	FALSE	FALSE	FALSE	FALSE	FALSE	FALSE	FALSE	FALSE	FALSE	FALSE	FALSE	FALSE	FALSE	FALSE	FALSE	FALSE	FALSE	FALSE	FALSE	FALSE	FALSE
subsilicic pargasite	FALSE	FALSE	FALSE	FALSE	FALSE	FALSE	FALSE	FALSE	FALSE	FALSE	FALSE	FALSE	FALSE	FALSE	FALSE	FALSE	FALSE	FALSE	FALSE	FALSE	FALSE	FALSE	FALSE	FALSE	FALSE	FALSE	FALSE	FALSE	FALSE	FALSE	FALSE	FALSE	FALSE	FALSE	FALSE	FALSE	FALSE	FALSE	FALSE	FALSE	FALSE	FALSE	FALSE	FALSE	FALSE	FALSE	FALSE	FALSE	FALSE
subsilicic ferroan pargasite	FALSE	FALSE	FALSE	FALSE	FALSE	FALSE	FALSE	FALSE	FALSE	FALSE	FALSE	FALSE	FALSE	FALSE	FALSE	FALSE	FALSE	FALSE	FALSE	FALSE	FALSE	FALSE	FALSE	FALSE	FALSE	FALSE	FALSE	FALSE	FALSE	FALSE	FALSE	FALSE	FALSE	FALSE	FALSE	FALSE	FALSE	FALSE	FALSE	FALSE	FALSE	FALSE	FALSE	FALSE	FALSE	FALSE	FALSE	FALSE	FALSE
subsilicic ferro-pargasite	FALSE	FALSE	FALSE	FALSE	FALSE	FALSE	FALSE	FALSE	FALSE	FALSE	FALSE	FALSE	FALSE	FALSE	FALSE	FALSE	FALSE	FALSE	FALSE	FALSE	FALSE	FALSE	FALSE	FALSE	FALSE	FALSE	FALSE	FALSE	FALSE	FALSE	FALSE	FALSE	FALSE	FALSE	FALSE	FALSE	FALSE	FALSE	FALSE	FALSE	FALSE	FALSE	FALSE	FALSE	FALSE	FALSE	FALSE	FALSE	FALSE
magnesio-sadanagaite	FALSE	FALSE	FALSE	FALSE	FALSE	FALSE	FALSE	FALSE	FALSE	FALSE	FALSE	FALSE	FALSE	FALSE	FALSE	FALSE	FALSE	FALSE	FALSE	FALSE	FALSE	FALSE	FALSE	FALSE	FALSE	FALSE	FALSE	FALSE	FALSE	FALSE	FALSE	FALSE	FALSE	FALSE	FALSE	FALSE	FALSE	FALSE	FALSE	FALSE	FALSE	FALSE	FALSE	FALSE	FALSE	FALSE	FALSE	FALSE	FALSE
sadanagaite	FALSE	FALSE	FALSE	FALSE	FALSE	FALSE	FALSE	FALSE	FALSE	FALSE	FALSE	FALSE	FALSE	FALSE	FALSE	FALSE	FALSE	FALSE	FALSE	FALSE	FALSE	FALSE	FALSE	FALSE	FALSE	FALSE	FALSE	FALSE	FALSE	FALSE	FALSE	FALSE	FALSE	FALSE	FALSE	FALSE	FALSE	FALSE	FALSE	FALSE	FALSE	FALSE	FALSE	FALSE	FALSE	FALSE	FALSE	FALSE	FALSE
magnesio-hastingsitic hornblende	FALSE	FALSE	FALSE	FALSE	FALSE	FALSE	FALSE	FALSE	FALSE	FALSE	FALSE	FALSE	FALSE	FALSE	FALSE	FALSE	FALSE	FALSE	FALSE	FALSE	FALSE	FALSE	FALSE	FALSE	FALSE	FALSE	FALSE	FALSE	FALSE	FALSE	FALSE	FALSE	FALSE	FALSE	FALSE	FALSE	FALSE	FALSE	FALSE	FALSE	FALSE	FALSE	FALSE	FALSE	FALSE	magnesio-hastingsitic hornblende	magnesio-hastingsitic hornblende	magnesio-hastingsitic hornblende	magnesio-hastingsitic hornblende
magnesian hastingsitic hornblende	FALSE	FALSE	FALSE	FALSE	FALSE	magnesian hastingsitic hornblende	magnesian hastingsitic hornblende	magnesian hastingsitic hornblende	FALSE	FALSE	FALSE	FALSE	FALSE	FALSE	magnesian hastingsitic hornblende	magnesian hastingsitic hornblende	magnesian hastingsitic hornblende	magnesian hastingsitic hornblende	FALSE	FALSE	FALSE	FALSE	FALSE	FALSE	FALSE	FALSE	FALSE	FALSE	FALSE	magnesian hastingsitic hornblende	magnesian hastingsitic hornblende	magnesian hastingsitic hornblende	FALSE	magnesian hastingsitic hornblende	FALSE	FALSE	FALSE	FALSE	magnesian hastingsitic hornblende	magnesian hastingsitic hornblende	magnesian hastingsitic hornblende	magnesian hastingsitic hornblende	magnesian hastingsitic hornblende	magnesian hastingsitic hornblende	FALSE	FALSE	FALSE	FALSE	FALSE
hastingsitic hornblende	FALSE	FALSE	FALSE	FALSE	FALSE	FALSE	FALSE	FALSE	FALSE	FALSE	FALSE	FALSE	FALSE	FALSE	FALSE	FALSE	FALSE	FALSE	FALSE	FALSE	FALSE	FALSE	FALSE	FALSE	FALSE	FALSE	FALSE	FALSE	FALSE	FALSE	FALSE	FALSE	FALSE	FALSE	FALSE	FALSE	FALSE	FALSE	FALSE	FALSE	FALSE	FALSE	FALSE	FALSE	FALSE	FALSE	FALSE	FALSE	FALSE
magnesio-hastingsite	FALSE	FALSE	FALSE	FALSE	FALSE	FALSE	FALSE	FALSE	FALSE	FALSE	FALSE	FALSE	FALSE	FALSE	FALSE	FALSE	FALSE	FALSE	FALSE	FALSE	FALSE	FALSE	FALSE	FALSE	FALSE	FALSE	FALSE	FALSE	FALSE	FALSE	FALSE	FALSE	FALSE	FALSE	FALSE	FALSE	FALSE	FALSE	FALSE	FALSE	FALSE	FALSE	FALSE	FALSE	FALSE	FALSE	FALSE	FALSE	FALSE
magnesian hastingsite	FALSE	FALSE	FALSE	FALSE	FALSE	FALSE	FALSE	FALSE	FALSE	FALSE	FALSE	FALSE	FALSE	FALSE	FALSE	FALSE	FALSE	FALSE	FALSE	FALSE	FALSE	FALSE	FALSE	FALSE	FALSE	FALSE	FALSE	FALSE	FALSE	FALSE	FALSE	FALSE	FALSE	FALSE	FALSE	FALSE	FALSE	FALSE	FALSE	FALSE	FALSE	FALSE	FALSE	FALSE	FALSE	FALSE	FALSE	FALSE	FALSE
hastingsite	FALSE	FALSE	FALSE	FALSE	FALSE	FALSE	FALSE	FALSE	FALSE	FALSE	FALSE	FALSE	FALSE	FALSE	FALSE	FALSE	FALSE	FALSE	FALSE	FALSE	FALSE	FALSE	FALSE	FALSE	FALSE	FALSE	FALSE	FALSE	FALSE	FALSE	FALSE	FALSE	FALSE	FALSE	FALSE	FALSE	FALSE	FALSE	FALSE	FALSE	FALSE	FALSE	FALSE	FALSE	FALSE	FALSE	FALSE	FALSE	FALSE
subsilicic magnesio-hastingsite	FALSE	FALSE	FALSE	FALSE	FALSE	FALSE	FALSE	FALSE	FALSE	FALSE	FALSE	FALSE	FALSE	FALSE	FALSE	FALSE	FALSE	FALSE	FALSE	FALSE	FALSE	FALSE	FALSE	FALSE	FALSE	FALSE	FALSE	FALSE	FALSE	FALSE	FALSE	FALSE	FALSE	FALSE	FALSE	FALSE	FALSE	FALSE	FALSE	FALSE	FALSE	FALSE	FALSE	FALSE	FALSE	FALSE	FALSE	FALSE	FALSE
subsilicic magnesian hastingsite	FALSE	FALSE	FALSE	FALSE	FALSE	FALSE	FALSE	FALSE	FALSE	FALSE	FALSE	FALSE	FALSE	FALSE	FALSE	FALSE	FALSE	FALSE	FALSE	FALSE	FALSE	FALSE	FALSE	FALSE	FALSE	FALSE	FALSE	FALSE	FALSE	FALSE	FALSE	FALSE	FALSE	FALSE	FALSE	FALSE	FALSE	FALSE	FALSE	FALSE	FALSE	FALSE	FALSE	FALSE	FALSE	FALSE	FALSE	FALSE	FALSE
subsilicic hastingsite	FALSE	FALSE	FALSE	FALSE	FALSE	FALSE	FALSE	FALSE	FALSE	FALSE	FALSE	FALSE	FALSE	FALSE	FALSE	FALSE	FALSE	FALSE	FALSE	FALSE	FALSE	FALSE	FALSE	FALSE	FALSE	FALSE	FALSE	FALSE	FALSE	FALSE	FALSE	FALSE	FALSE	FALSE	FALSE	FALSE	FALSE	FALSE	FALSE	FALSE	FALSE	FALSE	FALSE	FALSE	FALSE	FALSE	FALSE	FALSE	FALSE
kaersutite	FALSE	FALSE	FALSE	FALSE	FALSE	kaersutite	kaersutite	kaersutite	FALSE	FALSE	FALSE	FALSE	FALSE	FALSE	kaersutite	kaersutite	kaersutite	kaersutite	FALSE	FALSE	FALSE	FALSE	FALSE	FALSE	FALSE	FALSE	FALSE	FALSE	FALSE	kaersutite	kaersutite	kaersutite	FALSE	kaersutite	FALSE	FALSE	FALSE	FALSE	kaersutite	kaersutite	kaersutite	kaersutite	kaersutite	kaersutite	FALSE	kaersutite	kaersutite	kaersutite	kaersutite
ferro-kaersutite	FALSE	FALSE	FALSE	FALSE	FALSE	FALSE	FALSE	FALSE	FALSE	FALSE	FALSE	FALSE	FALSE	FALSE	FALSE	FALSE	FALSE	FALSE	FALSE	FALSE	FALSE	FALSE	FALSE	FALSE	FALSE	FALSE	FALSE	FALSE	FALSE	FALSE	FALSE	FALSE	FALSE	FALSE	FALSE	FALSE	FALSE	FALSE	FALSE	FALSE	FALSE	FALSE	FALSE	FALSE	FALSE	FALSE	FALSE	FALSE	FALSE
subsilicic kaersutite	FALSE	FALSE	FALSE	FALSE	FALSE	FALSE	FALSE	FALSE	FALSE	FALSE	FALSE	FALSE	FALSE	FALSE	FALSE	FALSE	FALSE	FALSE	FALSE	FALSE	FALSE	FALSE	FALSE	FALSE	FALSE	FALSE	FALSE	FALSE	FALSE	FALSE	FALSE	FALSE	FALSE	FALSE	FALSE	FALSE	FALSE	FALSE	FALSE	FALSE	FALSE	FALSE	FALSE	FALSE	FALSE	FALSE	FALSE	FALSE	FALSE
subsilicic ferro-kaersutite	FALSE	FALSE	FALSE	FALSE	FALSE	FALSE	FALSE	FALSE	FALSE	FALSE	FALSE	FALSE	FALSE	FALSE	FALSE	FALSE	FALSE	FALSE	FALSE	FALSE	FALSE	FALSE	FALSE	FALSE	FALSE	FALSE	FALSE	FALSE	FALSE	FALSE	FALSE	FALSE	FALSE	FALSE	FALSE	FALSE	FALSE	FALSE	FALSE	FALSE	FALSE	FALSE	FALSE	FALSE	FALSE	FALSE	FALSE	FALSE	FALSE
magnesio-anthophyllite	FALSE	FALSE	FALSE	FALSE	FALSE	FALSE	FALSE	FALSE	FALSE	FALSE	FALSE	FALSE	FALSE	FALSE	FALSE	FALSE	FALSE	FALSE	FALSE	FALSE	FALSE	FALSE	FALSE	FALSE	FALSE	FALSE	FALSE	FALSE	FALSE	FALSE	FALSE	FALSE	FALSE	FALSE	FALSE	FALSE	FALSE	FALSE	FALSE	FALSE	FALSE	FALSE	FALSE	FALSE	FALSE	FALSE	FALSE	FALSE	FALSE
anthophyllite	FALSE	anthophyllite	FALSE	FALSE	FALSE	FALSE	FALSE	FALSE	anthophyllite	anthophyllite	anthophyllite	anthophyllite	anthophyllite	anthophyllite	FALSE	FALSE	FALSE	FALSE	FALSE	FALSE	FALSE	FALSE	FALSE	FALSE	anthophyllite	anthophyllite	FALSE	FALSE	FALSE	FALSE	FALSE	FALSE	FALSE	FALSE	FALSE	FALSE	FALSE	FALSE	FALSE	FALSE	FALSE	FALSE	FALSE	FALSE	FALSE	FALSE	FALSE	FALSE	FALSE
ferro-anthophyllite	FALSE	FALSE	FALSE	FALSE	FALSE	FALSE	FALSE	FALSE	FALSE	FALSE	FALSE	FALSE	FALSE	FALSE	FALSE	FALSE	FALSE	FALSE	FALSE	FALSE	FALSE	FALSE	FALSE	FALSE	FALSE	FALSE	FALSE	FALSE	FALSE	FALSE	FALSE	FALSE	FALSE	FALSE	FALSE	FALSE	FALSE	FALSE	FALSE	FALSE	FALSE	FALSE	FALSE	FALSE	FALSE	FALSE	FALSE	FALSE	FALSE
magnesio-gedrite	FALSE	FALSE	FALSE	FALSE	FALSE	FALSE	FALSE	FALSE	FALSE	FALSE	FALSE	FALSE	FALSE	FALSE	FALSE	FALSE	FALSE	FALSE	FALSE	FALSE	FALSE	FALSE	FALSE	FALSE	FALSE	FALSE	FALSE	FALSE	FALSE	FALSE	FALSE	FALSE	FALSE	FALSE	FALSE	FALSE	FALSE	FALSE	FALSE	FALSE	FALSE	FALSE	FALSE	FALSE	FALSE	FALSE	FALSE	FALSE	FALSE
gedrite	gedrite	FALSE	gedrite	gedrite	gedrite	gedrite	gedrite	gedrite	FALSE	FALSE	FALSE	FALSE	FALSE	FALSE	gedrite	gedrite	gedrite	gedrite	gedrite	gedrite	gedrite	gedrite	gedrite	gedrite	FALSE	FALSE	gedrite	gedrite	gedrite	gedrite	gedrite	gedrite	gedrite	gedrite	gedrite	gedrite	gedrite	gedrite	gedrite	gedrite	gedrite	gedrite	gedrite	gedrite	gedrite	gedrite	gedrite	gedrite	gedrite
ferro-gedrite	FALSE	FALSE	FALSE	FALSE	FALSE	FALSE	FALSE	FALSE	FALSE	FALSE	FALSE	FALSE	FALSE	FALSE	FALSE	FALSE	FALSE	FALSE	FALSE	FALSE	FALSE	FALSE	FALSE	FALSE	FALSE	FALSE	FALSE	FALSE	FALSE	FALSE	FALSE	FALSE	FALSE	FALSE	FALSE	FALSE	FALSE	FALSE	FALSE	FALSE	FALSE	FALSE	FALSE	FALSE	FALSE	FALSE	FALSE	FALSE	FALSE
magnesio-cummingtonite	FALSE	magnesio-cummingtonite	FALSE	FALSE	FALSE	FALSE	FALSE	FALSE	magnesio-cummingtonite	magnesio-cummingtonite	magnesio-cummingtonite	magnesio-cummingtonite	magnesio-cummingtonite	magnesio-cummingtonite	FALSE	FALSE	FALSE	FALSE	FALSE	magnesio-cummingtonite	magnesio-cummingtonite	magnesio-cummingtonite	magnesio-cummingtonite	FALSE	magnesio-cummingtonite	FALSE	FALSE	FALSE	FALSE	FALSE	FALSE	FALSE	FALSE	FALSE	FALSE	FALSE	FALSE	magnesio-cummingtonite	FALSE	FALSE	FALSE	FALSE	FALSE	FALSE	magnesio-cummingtonite	magnesio-cummingtonite	magnesio-cummingtonite	magnesio-cummingtonite	magnesio-cummingtonite
cummingtonite	cummingtonite	FALSE	cummingtonite	cummingtonite	cummingtonite	cummingtonite	cummingtonite	cummingtonite	FALSE	FALSE	FALSE	FALSE	FALSE	FALSE	cummingtonite	cummingtonite	cummingtonite	cummingtonite	cummingtonite	FALSE	FALSE	FALSE	FALSE	cummingtonite	FALSE	cummingtonite	cummingtonite	cummingtonite	cummingtonite	cummingtonite	cummingtonite	cummingtonite	cummingtonite	cummingtonite	cummingtonite	cummingtonite	cummingtonite	FALSE	cummingtonite	cummingtonite	cummingtonite	cummingtonite	cummingtonite	cummingtonite	FALSE	FALSE	FALSE	FALSE	FALSE
grunerite	FALSE	FALSE	FALSE	FALSE	FALSE	FALSE	FALSE	FALSE	FALSE	FALSE	FALSE	FALSE	FALSE	FALSE	FALSE	FALSE	FALSE	FALSE	FALSE	FALSE	FALSE	FALSE	FALSE	FALSE	FALSE	FALSE	FALSE	FALSE	FALSE	FALSE	FALSE	FALSE	FALSE	FALSE	FALSE	FALSE	FALSE	FALSE	FALSE	FALSE	FALSE	FALSE	FALSE	FALSE	FALSE	FALSE	FALSE	FALSE	FALSE
dannemoreite	FALSE	FALSE	FALSE	FALSE	FALSE	FALSE	FALSE	FALSE	FALSE	FALSE	FALSE	FALSE	FALSE	FALSE	FALSE	FALSE	FALSE	FALSE	FALSE	FALSE	FALSE	FALSE	FALSE	FALSE	FALSE	FALSE	FALSE	FALSE	FALSE	FALSE	FALSE	FALSE	FALSE	FALSE	FALSE	FALSE	FALSE	FALSE	FALSE	FALSE	FALSE	FALSE	FALSE	FALSE	FALSE	FALSE	FALSE	FALSE	FALSE
tirodite	FALSE	FALSE	FALSE	FALSE	FALSE	FALSE	FALSE	FALSE	FALSE	FALSE	FALSE	FALSE	FALSE	FALSE	FALSE	FALSE	FALSE	FALSE	FALSE	FALSE	FALSE	FALSE	FALSE	FALSE	FALSE	FALSE	FALSE	FALSE	FALSE	FALSE	FALSE	FALSE	FALSE	FALSE	FALSE	FALSE	FALSE	FALSE	FALSE	FALSE	FALSE	FALSE	FALSE	FALSE	FALSE	FALSE	FALSE	FALSE	FALSE
winchite	FALSE	FALSE	FALSE	FALSE	FALSE	FALSE	FALSE	FALSE	FALSE	winchite	winchite	FALSE	FALSE	FALSE	FALSE	FALSE	FALSE	FALSE	FALSE	FALSE	FALSE	FALSE	FALSE	FALSE	FALSE	FALSE	FALSE	FALSE	FALSE	FALSE	FALSE	FALSE	FALSE	FALSE	FALSE	FALSE	FALSE	FALSE	FALSE	FALSE	FALSE	FALSE	FALSE	FALSE	FALSE	FALSE	FALSE	FALSE	FALSE
ferro-winchite	FALSE	FALSE	FALSE	FALSE	FALSE	FALSE	FALSE	FALSE	FALSE	FALSE	FALSE	FALSE	FALSE	FALSE	FALSE	FALSE	FALSE	FALSE	FALSE	FALSE	FALSE	FALSE	FALSE	FALSE	FALSE	FALSE	FALSE	FALSE	FALSE	FALSE	FALSE	FALSE	FALSE	FALSE	FALSE	FALSE	FALSE	FALSE	FALSE	FALSE	FALSE	FALSE	FALSE	FALSE	FALSE	FALSE	FALSE	FALSE	FALSE
barroisite	barroisite	barroisite	barroisite	barroisite	barroisite	FALSE	FALSE	FALSE	barroisite	FALSE	FALSE	barroisite	barroisite	barroisite	FALSE	FALSE	FALSE	FALSE	barroisite	barroisite	barroisite	barroisite	barroisite	barroisite	barroisite	barroisite	barroisite	barroisite	barroisite	FALSE	FALSE	FALSE	barroisite	FALSE	barroisite	barroisite	barroisite	barroisite	FALSE	FALSE	FALSE	FALSE	FALSE	FALSE	barroisite	FALSE	FALSE	FALSE	FALSE
ferro-barroisite	FALSE	FALSE	FALSE	FALSE	FALSE	FALSE	FALSE	FALSE	FALSE	FALSE	FALSE	FALSE	FALSE	FALSE	FALSE	FALSE	FALSE	FALSE	FALSE	FALSE	FALSE	FALSE	FALSE	FALSE	FALSE	FALSE	FALSE	FALSE	FALSE	FALSE	FALSE	FALSE	FALSE	FALSE	FALSE	FALSE	FALSE	FALSE	FALSE	FALSE	FALSE	FALSE	FALSE	FALSE	FALSE	FALSE	FALSE	FALSE	FALSE
richterite	FALSE	FALSE	FALSE	FALSE	FALSE	FALSE	FALSE	FALSE	FALSE	richterite	richterite	FALSE	FALSE	FALSE	FALSE	FALSE	FALSE	FALSE	FALSE	FALSE	FALSE	FALSE	FALSE	FALSE	FALSE	FALSE	FALSE	FALSE	FALSE	FALSE	FALSE	FALSE	FALSE	FALSE	FALSE	FALSE	FALSE	FALSE	FALSE	FALSE	FALSE	FALSE	FALSE	FALSE	FALSE	FALSE	FALSE	FALSE	FALSE
ferro-richterite	FALSE	FALSE	FALSE	FALSE	FALSE	FALSE	FALSE	FALSE	FALSE	FALSE	FALSE	FALSE	FALSE	FALSE	FALSE	FALSE	FALSE	FALSE	FALSE	FALSE	FALSE	FALSE	FALSE	FALSE	FALSE	FALSE	FALSE	FALSE	FALSE	FALSE	FALSE	FALSE	FALSE	FALSE	FALSE	FALSE	FALSE	FALSE	FALSE	FALSE	FALSE	FALSE	FALSE	FALSE	FALSE	FALSE	FALSE	FALSE	FALSE
magnesio-kataphorite	magnesio-kataphorite	magnesio-kataphorite	magnesio-kataphorite	magnesio-kataphorite	magnesio-kataphorite	FALSE	FALSE	FALSE	magnesio-kataphorite	FALSE	FALSE	magnesio-kataphorite	magnesio-kataphorite	magnesio-kataphorite	FALSE	FALSE	FALSE	FALSE	magnesio-kataphorite	magnesio-kataphorite	magnesio-kataphorite	magnesio-kataphorite	magnesio-kataphorite	magnesio-kataphorite	magnesio-kataphorite	magnesio-kataphorite	magnesio-kataphorite	magnesio-kataphorite	magnesio-kataphorite	FALSE	FALSE	FALSE	magnesio-kataphorite	FALSE	magnesio-kataphorite	magnesio-kataphorite	magnesio-kataphorite	magnesio-kataphorite	FALSE	FALSE	FALSE	FALSE	FALSE	FALSE	magnesio-kataphorite	FALSE	FALSE	FALSE	FALSE
katophorite	FALSE	FALSE	FALSE	FALSE	FALSE	FALSE	FALSE	FALSE	FALSE	FALSE	FALSE	FALSE	FALSE	FALSE	FALSE	FALSE	FALSE	FALSE	FALSE	FALSE	FALSE	FALSE	FALSE	FALSE	FALSE	FALSE	FALSE	FALSE	FALSE	FALSE	FALSE	FALSE	FALSE	FALSE	FALSE	FALSE	FALSE	FALSE	FALSE	FALSE	FALSE	FALSE	FALSE	FALSE	FALSE	FALSE	FALSE	FALSE	FALSE
magnesio-taramite	FALSE	FALSE	FALSE	FALSE	FALSE	FALSE	FALSE	FALSE	FALSE	FALSE	FALSE	FALSE	FALSE	FALSE	FALSE	FALSE	FALSE	FALSE	FALSE	FALSE	FALSE	FALSE	FALSE	FALSE	FALSE	FALSE	FALSE	FALSE	FALSE	FALSE	FALSE	FALSE	FALSE	FALSE	FALSE	FALSE	FALSE	FALSE	FALSE	FALSE	FALSE	FALSE	FALSE	FALSE	FALSE	FALSE	FALSE	FALSE	FALSE
taramite	FALSE	FALSE	FALSE	FALSE	FALSE	FALSE	FALSE	FALSE	FALSE	FALSE	FALSE	FALSE	FALSE	FALSE	FALSE	FALSE	FALSE	FALSE	FALSE	FALSE	FALSE	FALSE	FALSE	FALSE	FALSE	FALSE	FALSE	FALSE	FALSE	FALSE	FALSE	FALSE	FALSE	FALSE	FALSE	FALSE	FALSE	FALSE	FALSE	FALSE	FALSE	FALSE	FALSE	FALSE	FALSE	FALSE	FALSE	FALSE	FALSE
ferro-eckermannite	FALSE	FALSE	FALSE	FALSE	FALSE	FALSE	FALSE	FALSE	FALSE	FALSE	FALSE	FALSE	FALSE	FALSE	FALSE	FALSE	FALSE	FALSE	FALSE	FALSE	FALSE	FALSE	FALSE	FALSE	FALSE	FALSE	FALSE	FALSE	FALSE	FALSE	FALSE	FALSE	FALSE	FALSE	FALSE	FALSE	FALSE	FALSE	FALSE	FALSE	FALSE	FALSE	FALSE	FALSE	FALSE	FALSE	FALSE	FALSE	FALSE
eckermannite	FALSE	FALSE	eckermannite	FALSE	eckermannite	FALSE	FALSE	eckermannite	eckermannite	eckermannite	FALSE	FALSE	FALSE	FALSE	FALSE	FALSE	FALSE	FALSE	FALSE	FALSE	FALSE	FALSE	FALSE	FALSE	eckermannite	FALSE	FALSE	FALSE	FALSE	FALSE	eckermannite	FALSE	FALSE	FALSE	FALSE	FALSE	FALSE	FALSE	FALSE	FALSE	FALSE	FALSE	FALSE	FALSE	eckermannite	eckermannite	eckermannite	eckermannite	FALSE
arfvedsonite	FALSE	FALSE	FALSE	FALSE	FALSE	FALSE	FALSE	FALSE	FALSE	FALSE	FALSE	FALSE	FALSE	FALSE	FALSE	FALSE	FALSE	FALSE	FALSE	FALSE	FALSE	FALSE	FALSE	FALSE	FALSE	FALSE	FALSE	FALSE	FALSE	FALSE	FALSE	FALSE	FALSE	FALSE	FALSE	FALSE	FALSE	FALSE	FALSE	FALSE	FALSE	FALSE	FALSE	FALSE	FALSE	FALSE	FALSE	FALSE	FALSE
kozulite	FALSE	FALSE	FALSE	FALSE	FALSE	FALSE	FALSE	FALSE	FALSE	FALSE	FALSE	FALSE	FALSE	FALSE	FALSE	FALSE	FALSE	FALSE	FALSE	FALSE	FALSE	FALSE	FALSE	FALSE	FALSE	FALSE	FALSE	FALSE	FALSE	FALSE	FALSE	FALSE	FALSE	FALSE	FALSE	FALSE	FALSE	FALSE	FALSE	FALSE	FALSE	FALSE	FALSE	FALSE	FALSE	FALSE	FALSE	FALSE	FALSE
magnesio-arfvedsonite	magnesio-arfvedsonite	magnesio-arfvedsonite	FALSE	magnesio-arfvedsonite	FALSE	magnesio-arfvedsonite	magnesio-arfvedsonite	FALSE	FALSE	FALSE	magnesio-arfvedsonite	magnesio-arfvedsonite	magnesio-arfvedsonite	magnesio-arfvedsonite	magnesio-arfvedsonite	magnesio-arfvedsonite	magnesio-arfvedsonite	magnesio-arfvedsonite	magnesio-arfvedsonite	magnesio-arfvedsonite	magnesio-arfvedsonite	magnesio-arfvedsonite	magnesio-arfvedsonite	magnesio-arfvedsonite	FALSE	magnesio-arfvedsonite	magnesio-arfvedsonite	magnesio-arfvedsonite	magnesio-arfvedsonite	magnesio-arfvedsonite	FALSE	magnesio-arfvedsonite	magnesio-arfvedsonite	magnesio-arfvedsonite	magnesio-arfvedsonite	magnesio-arfvedsonite	magnesio-arfvedsonite	magnesio-arfvedsonite	magnesio-arfvedsonite	magnesio-arfvedsonite	magnesio-arfvedsonite	magnesio-arfvedsonite	magnesio-arfvedsonite	magnesio-arfvedsonite	FALSE	FALSE	FALSE	FALSE	magnesio-arfvedsonite
ferro-glaucophane	FALSE	FALSE	FALSE	FALSE	FALSE	FALSE	FALSE	FALSE	FALSE	FALSE	FALSE	FALSE	FALSE	FALSE	FALSE	FALSE	FALSE	FALSE	FALSE	FALSE	FALSE	FALSE	FALSE	FALSE	FALSE	FALSE	FALSE	FALSE	FALSE	FALSE	FALSE	FALSE	FALSE	FALSE	FALSE	FALSE	FALSE	FALSE	FALSE	FALSE	FALSE	FALSE	FALSE	FALSE	FALSE	FALSE	FALSE	FALSE	FALSE
glaucophane	FALSE	FALSE	FALSE	FALSE	FALSE	FALSE	FALSE	FALSE	FALSE	FALSE	FALSE	FALSE	FALSE	FALSE	FALSE	FALSE	FALSE	FALSE	FALSE	FALSE	FALSE	FALSE	FALSE	FALSE	FALSE	FALSE	FALSE	FALSE	FALSE	FALSE	FALSE	FALSE	FALSE	FALSE	FALSE	FALSE	FALSE	FALSE	FALSE	FALSE	FALSE	FALSE	FALSE	FALSE	FALSE	FALSE	FALSE	FALSE	FALSE
crossite	crossite	crossite	crossite	crossite	crossite	crossite	crossite	crossite	crossite	crossite	FALSE	crossite	crossite	FALSE	crossite	crossite	crossite	crossite	crossite	crossite	crossite	crossite	crossite	crossite	crossite	crossite	crossite	crossite	crossite	crossite	crossite	crossite	crossite	crossite	crossite	crossite	crossite	FALSE	crossite	crossite	crossite	crossite	crossite	crossite	crossite	crossite	crossite	crossite	crossite
riebeckite	FALSE	FALSE	FALSE	FALSE	FALSE	FALSE	FALSE	FALSE	FALSE	FALSE	FALSE	FALSE	FALSE	FALSE	FALSE	FALSE	FALSE	FALSE	FALSE	FALSE	FALSE	FALSE	FALSE	FALSE	FALSE	FALSE	FALSE	FALSE	FALSE	FALSE	FALSE	FALSE	FALSE	FALSE	FALSE	FALSE	FALSE	FALSE	FALSE	FALSE	FALSE	FALSE	FALSE	FALSE	FALSE	FALSE	FALSE	FALSE	FALSE
magnesio-riebeckite	FALSE	FALSE	FALSE	FALSE	FALSE	FALSE	FALSE	FALSE	FALSE	FALSE	magnesio-riebeckite	FALSE	FALSE	magnesio-riebeckite	FALSE	FALSE	FALSE	FALSE	FALSE	FALSE	FALSE	FALSE	FALSE	FALSE	FALSE	FALSE	FALSE	FALSE	FALSE	FALSE	FALSE	FALSE	FALSE	FALSE	FALSE	FALSE	FALSE	magnesio-riebeckite	FALSE	FALSE	FALSE	FALSE	FALSE	FALSE	FALSE	FALSE	FALSE	FALSE	FALSE
ferro-nyboite	FALSE	FALSE	FALSE	FALSE	FALSE	FALSE	FALSE	FALSE	FALSE	FALSE	FALSE	FALSE	FALSE	FALSE	FALSE	FALSE	FALSE	FALSE	FALSE	FALSE	FALSE	FALSE	FALSE	FALSE	FALSE	FALSE	FALSE	FALSE	FALSE	FALSE	FALSE	FALSE	FALSE	FALSE	FALSE	FALSE	FALSE	FALSE	FALSE	FALSE	FALSE	FALSE	FALSE	FALSE	FALSE	FALSE	FALSE	FALSE	FALSE
nyboite	FALSE	FALSE	nyboite	FALSE	nyboite	FALSE	FALSE	FALSE	nyboite	nyboite	FALSE	FALSE	FALSE	FALSE	FALSE	FALSE	FALSE	FALSE	FALSE	FALSE	FALSE	FALSE	FALSE	FALSE	nyboite	FALSE	FALSE	FALSE	FALSE	FALSE	FALSE	FALSE	FALSE	FALSE	FALSE	FALSE	FALSE	FALSE	FALSE	FALSE	FALSE	FALSE	FALSE	FALSE	nyboite	FALSE	FALSE	FALSE	FALSE
ferro-anophorite	FALSE	FALSE	FALSE	FALSE	FALSE	FALSE	FALSE	FALSE	FALSE	FALSE	FALSE	FALSE	FALSE	FALSE	FALSE	FALSE	FALSE	FALSE	FALSE	FALSE	FALSE	FALSE	FALSE	FALSE	FALSE	FALSE	FALSE	FALSE	FALSE	FALSE	FALSE	FALSE	FALSE	FALSE	FALSE	FALSE	FALSE	FALSE	FALSE	FALSE	FALSE	FALSE	FALSE	FALSE	FALSE	FALSE	FALSE	FALSE	FALSE
anophorite	anophorite	anophorite	FALSE	anophorite	FALSE	FALSE	FALSE	FALSE	FALSE	FALSE	anophorite	anophorite	anophorite	anophorite	FALSE	FALSE	FALSE	FALSE	anophorite	anophorite	anophorite	anophorite	anophorite	anophorite	FALSE	anophorite	anophorite	anophorite	anophorite	FALSE	FALSE	FALSE	anophorite	FALSE	anophorite	anophorite	anophorite	anophorite	FALSE	FALSE	FALSE	FALSE	FALSE	FALSE	FALSE	FALSE	FALSE	FALSE	FALSE
Part 11. Find correct amphibole group
Ca amphibole ?	Ca	Ca	Ca	Ca	Ca	Ca	Ca	Ca	Ca	Ca	Ca	Ca	Ca	Ca	Ca	Ca	Ca	Ca	Ca	Ca	Ca	Ca	Ca	Ca	Ca	Ca	Ca	Ca	Ca	Ca	Ca	Ca	Ca	Ca	Ca	Ca	Ca	Ca	Ca	Ca	Ca	Ca	Ca	Ca	Ca	Ca	Ca	Ca	Ca
Fe-Mg-Mn amph ?	FALSE	FALSE	FALSE	FALSE	FALSE	FALSE	FALSE	FALSE	FALSE	FALSE	FALSE	FALSE	FALSE	FALSE	FALSE	FALSE	FALSE	FALSE	FALSE	FALSE	FALSE	FALSE	FALSE	FALSE	FALSE	FALSE	FALSE	FALSE	FALSE	FALSE	FALSE	FALSE	FALSE	FALSE	FALSE	FALSE	FALSE	FALSE	FALSE	FALSE	FALSE	FALSE	FALSE	FALSE	FALSE	FALSE	FALSE	FALSE	FALSE
Na-Ca amph ?	FALSE	FALSE	FALSE	FALSE	FALSE	FALSE	FALSE	FALSE	FALSE	FALSE	FALSE	FALSE	FALSE	FALSE	FALSE	FALSE	FALSE	FALSE	FALSE	FALSE	FALSE	FALSE	FALSE	FALSE	FALSE	FALSE	FALSE	FALSE	FALSE	FALSE	FALSE	FALSE	FALSE	FALSE	FALSE	FALSE	FALSE	FALSE	FALSE	FALSE	FALSE	FALSE	FALSE	FALSE	FALSE	FALSE	FALSE	FALSE	FALSE
Alkali amph ?	FALSE	FALSE	FALSE	FALSE	FALSE	FALSE	FALSE	FALSE	FALSE	FALSE	FALSE	FALSE	FALSE	FALSE	FALSE	FALSE	FALSE	FALSE	FALSE	FALSE	FALSE	FALSE	FALSE	FALSE	FALSE	FALSE	FALSE	FALSE	FALSE	FALSE	FALSE	FALSE	FALSE	FALSE	FALSE	FALSE	FALSE	FALSE	FALSE	FALSE	FALSE	FALSE	FALSE	FALSE	FALSE	FALSE	FALSE	FALSE	FALSE
Which amph group ?	Ca	Ca	Ca	Ca	Ca	Ca	Ca	Ca	Ca	Ca	Ca	Ca	Ca	Ca	Ca	Ca	Ca	Ca	Ca	Ca	Ca	Ca	Ca	Ca	Ca	Ca	Ca	Ca	Ca	Ca	Ca	Ca	Ca	Ca	Ca	Ca	Ca	Ca	Ca	Ca	Ca	Ca	Ca	Ca	Ca	Ca	Ca	Ca	Ca
Part 12. Select TRUE name on each diagram
Ca diagram 1	FALSEFALSEFALSEFALSEFALSEFALSEmagnesio-hornblendeFALSEFALSEFALSEFALSEFALSEFALSEFALSE	FALSEFALSEFALSEFALSEFALSEFALSEmagnesio-hornblendeFALSEFALSEFALSEFALSEFALSEFALSEFALSE	FALSEFALSEFALSEFALSEFALSEFALSEmagnesio-hornblendeFALSEFALSEFALSEFALSEFALSEFALSEFALSE	FALSEFALSEFALSEFALSEFALSEFALSEmagnesio-hornblendeFALSEFALSEFALSEFALSEFALSEFALSEFALSE	FALSEFALSEFALSEFALSEFALSEFALSEmagnesio-hornblendeFALSEFALSEFALSEFALSEFALSEFALSEFALSE	FALSEFALSEFALSEFALSEFALSEFALSEFALSEFALSEtschermakitic hornblendeFALSEFALSEFALSEFALSEFALSE	FALSEFALSEFALSEFALSEFALSEFALSEFALSEFALSEtschermakitic hornblendeFALSEFALSEFALSEFALSEFALSE	FALSEFALSEFALSEFALSEFALSEFALSEFALSEFALSEtschermakitic hornblendeFALSEFALSEFALSEFALSEFALSE	FALSEFALSEFALSEFALSEactinolitic hornblendeFALSEFALSEFALSEFALSEFALSEFALSEFALSEFALSEFALSE	FALSEactinoliteFALSEFALSEFALSEFALSEFALSEFALSEFALSEFALSEFALSEFALSEFALSEFALSE	FALSEactinoliteFALSEFALSEFALSEFALSEFALSEFALSEFALSEFALSEFALSEFALSEFALSEFALSE	FALSEFALSEFALSEFALSEFALSEFALSEmagnesio-hornblendeFALSEFALSEFALSEFALSEFALSEFALSEFALSE	FALSEFALSEFALSEFALSEFALSEFALSEmagnesio-hornblendeFALSEFALSEFALSEFALSEFALSEFALSEFALSE	FALSEFALSEFALSEFALSEFALSEFALSEmagnesio-hornblendeFALSEFALSEFALSEFALSEFALSEFALSEFALSE	FALSEFALSEFALSEFALSEFALSEFALSEFALSEFALSEtschermakitic hornblendeFALSEFALSEFALSEFALSEFALSE	FALSEFALSEFALSEFALSEFALSEFALSEFALSEFALSEtschermakitic hornblendeFALSEFALSEFALSEFALSEFALSE	FALSEFALSEFALSEFALSEFALSEFALSEFALSEFALSEtschermakitic hornblendeFALSEFALSEFALSEFALSEFALSE	FALSEFALSEFALSEFALSEFALSEFALSEFALSEFALSEtschermakitic hornblendeFALSEFALSEFALSEFALSEFALSE	FALSEFALSEFALSEFALSEFALSEFALSEmagnesio-hornblendeFALSEFALSEFALSEFALSEFALSEFALSEFALSE	FALSEFALSEFALSEFALSEFALSEFALSEmagnesio-hornblendeFALSEFALSEFALSEFALSEFALSEFALSEFALSE	FALSEFALSEFALSEFALSEFALSEFALSEmagnesio-hornblendeFALSEFALSEFALSEFALSEFALSEFALSEFALSE	FALSEFALSEFALSEFALSEFALSEFALSEmagnesio-hornblendeFALSEFALSEFALSEFALSEFALSEFALSEFALSE	FALSEFALSEFALSEFALSEFALSEFALSEmagnesio-hornblendeFALSEFALSEFALSEFALSEFALSEFALSEFALSE	FALSEFALSEFALSEFALSEFALSEFALSEmagnesio-hornblendeFALSEFALSEFALSEFALSEFALSEFALSEFALSE	FALSEFALSEFALSEFALSEactinolitic hornblendeFALSEFALSEFALSEFALSEFALSEFALSEFALSEFALSEFALSE	FALSEFALSEFALSEFALSEFALSEFALSEmagnesio-hornblendeFALSEFALSEFALSEFALSEFALSEFALSEFALSE	FALSEFALSEFALSEFALSEFALSEFALSEmagnesio-hornblendeFALSEFALSEFALSEFALSEFALSEFALSEFALSE	FALSEFALSEFALSEFALSEFALSEFALSEmagnesio-hornblendeFALSEFALSEFALSEFALSEFALSEFALSEFALSE	FALSEFALSEFALSEFALSEFALSEFALSEmagnesio-hornblendeFALSEFALSEFALSEFALSEFALSEFALSEFALSE	FALSEFALSEFALSEFALSEFALSEFALSEFALSEFALSEtschermakitic hornblendeFALSEFALSEFALSEFALSEFALSE	FALSEFALSEFALSEFALSEFALSEFALSEFALSEFALSEtschermakitic hornblendeFALSEFALSEFALSEFALSEFALSE	FALSEFALSEFALSEFALSEFALSEFALSEFALSEFALSEtschermakitic hornblendeFALSEFALSEFALSEFALSEFALSE	FALSEFALSEFALSEFALSEFALSEFALSEmagnesio-hornblendeFALSEFALSEFALSEFALSEFALSEFALSEFALSE	FALSEFALSEFALSEFALSEFALSEFALSEFALSEFALSEtschermakitic hornblendeFALSEFALSEFALSEFALSEFALSE	FALSEFALSEFALSEFALSEFALSEFALSEmagnesio-hornblendeFALSEFALSEFALSEFALSEFALSEFALSEFALSE	FALSEFALSEFALSEFALSEFALSEFALSEmagnesio-hornblendeFALSEFALSEFALSEFALSEFALSEFALSEFALSE	FALSEFALSEFALSEFALSEFALSEFALSEmagnesio-hornblendeFALSEFALSEFALSEFALSEFALSEFALSEFALSE	FALSEFALSEFALSEFALSEFALSEFALSEmagnesio-hornblendeFALSEFALSEFALSEFALSEFALSEFALSEFALSE	FALSEFALSEFALSEFALSEFALSEFALSEFALSEFALSEtschermakitic hornblendeFALSEFALSEFALSEFALSEFALSE	FALSEFALSEFALSEFALSEFALSEFALSEFALSEFALSEtschermakitic hornblendeFALSEFALSEFALSEFALSEFALSE	FALSEFALSEFALSEFALSEFALSEFALSEFALSEFALSEtschermakitic hornblendeFALSEFALSEFALSEFALSEFALSE	FALSEFALSEFALSEFALSEFALSEFALSEFALSEFALSEtschermakitic hornblendeFALSEFALSEFALSEFALSEFALSE	FALSEFALSEFALSEFALSEFALSEFALSEFALSEFALSEtschermakitic hornblendeFALSEFALSEFALSEFALSEFALSE	FALSEFALSEFALSEFALSEFALSEFALSEFALSEFALSEtschermakitic hornblendeFALSEFALSEFALSEFALSEFALSE	FALSEFALSEFALSEFALSEFALSEFALSEmagnesio-hornblendeFALSEFALSEFALSEFALSEFALSEFALSEFALSE	FALSEFALSEFALSEFALSEFALSEFALSEFALSEFALSEtschermakitic hornblendeFALSEFALSEFALSEFALSEFALSE	FALSEFALSEFALSEFALSEFALSEFALSEFALSEFALSEtschermakitic hornblendeFALSEFALSEFALSEFALSEFALSE	FALSEFALSEFALSEFALSEFALSEFALSEFALSEFALSEtschermakitic hornblendeFALSEFALSEFALSEFALSEFALSE	FALSEFALSEFALSEFALSEFALSEFALSEFALSEFALSEtschermakitic hornblendeFALSEFALSEFALSEFALSEFALSE
	magnesio-hornblende	magnesio-hornblende	magnesio-hornblende	magnesio-hornblende	magnesio-hornblende	tschermakitic hornblende	tschermakitic hornblende	tschermakitic hornblende	actinolitic hornblende	actinolite	actinolite	magnesio-hornblende	magnesio-hornblende	magnesio-hornblende	tschermakitic hornblende	tschermakitic hornblende	tschermakitic hornblende	tschermakitic hornblende	magnesio-hornblende	magnesio-hornblende	magnesio-hornblende	magnesio-hornblende	magnesio-hornblende	magnesio-hornblende	actinolitic hornblende	magnesio-hornblende	magnesio-hornblende	magnesio-hornblende	magnesio-hornblende	tschermakitic hornblende	tschermakitic hornblende	tschermakitic hornblende	magnesio-hornblende	tschermakitic hornblende	magnesio-hornblende	magnesio-hornblende	magnesio-hornblende	magnesio-hornblende	tschermakitic hornblende	tschermakitic hornblende	tschermakitic hornblende	tschermakitic hornblende	tschermakitic hornblende	tschermakitic hornblende	magnesio-hornblende	tschermakitic hornblende	tschermakitic hornblende	tschermakitic hornblende	tschermakitic hornblende
Ca diagram 2	FALSEFALSEFALSEFALSEedenitic hornblendeFALSEFALSEFALSEFALSEFALSEFALSEFALSEFALSEFALSEFALSEFALSEFALSE	FALSEFALSEedeniteFALSEFALSEFALSEFALSEFALSEFALSEFALSEFALSEFALSEFALSEFALSEFALSEFALSEFALSE	FALSEFALSEFALSEFALSEedenitic hornblendeFALSEFALSEFALSEFALSEFALSEFALSEFALSEFALSEFALSEFALSEFALSEFALSE	FALSEFALSEFALSEFALSEedenitic hornblendeFALSEFALSEFALSEFALSEFALSEFALSEFALSEFALSEFALSEFALSEFALSEFALSE	FALSEFALSEFALSEFALSEedenitic hornblendeFALSEFALSEFALSEFALSEFALSEFALSEFALSEFALSEFALSEFALSEFALSEFALSE	FALSEFALSEFALSEFALSEFALSEFALSEFALSEferroan pargasitic hornblendeFALSEFALSEFALSEFALSEFALSEFALSEFALSEFALSEFALSE	FALSEFALSEFALSEFALSEFALSEFALSEFALSEferroan pargasitic hornblendeFALSEFALSEFALSEFALSEFALSEFALSEFALSEFALSEFALSE	FALSEFALSEFALSEFALSEFALSEFALSEFALSEferroan pargasitic hornblendeFALSEFALSEFALSEFALSEFALSEFALSEFALSEFALSEFALSE	silicic edeniteFALSEFALSEFALSEFALSEFALSEFALSEFALSEFALSEFALSEFALSEFALSEFALSEFALSEFALSEFALSEFALSE	silicic edeniteFALSEFALSEFALSEFALSEFALSEFALSEFALSEFALSEFALSEFALSEFALSEFALSEFALSEFALSEFALSEFALSE	silicic edeniteFALSEFALSEFALSEFALSEFALSEFALSEFALSEFALSEFALSEFALSEFALSEFALSEFALSEFALSEFALSEFALSE	FALSEFALSEedeniteFALSEFALSEFALSEFALSEFALSEFALSEFALSEFALSEFALSEFALSEFALSEFALSEFALSEFALSE	FALSEFALSEedeniteFALSEFALSEFALSEFALSEFALSEFALSEFALSEFALSEFALSEFALSEFALSEFALSEFALSEFALSE	FALSEFALSEedeniteFALSEFALSEFALSEFALSEFALSEFALSEFALSEFALSEFALSEFALSEFALSEFALSEFALSEFALSE	FALSEFALSEFALSEFALSEFALSEFALSEFALSEferroan pargasitic hornblendeFALSEFALSEFALSEFALSEFALSEFALSEFALSEFALSEFALSE	FALSEFALSEFALSEFALSEFALSEFALSEFALSEferroan pargasitic hornblendeFALSEFALSEFALSEFALSEFALSEFALSEFALSEFALSEFALSE	FALSEFALSEFALSEFALSEFALSEFALSEFALSEferroan pargasitic hornblendeFALSEFALSEFALSEFALSEFALSEFALSEFALSEFALSEFALSE	FALSEFALSEFALSEFALSEFALSEFALSEFALSEferroan pargasitic hornblendeFALSEFALSEFALSEFALSEFALSEFALSEFALSEFALSEFALSE	FALSEFALSEFALSEFALSEedenitic hornblendeFALSEFALSEFALSEFALSEFALSEFALSEFALSEFALSEFALSEFALSEFALSEFALSE	FALSEFALSEFALSEFALSEedenitic hornblendeFALSEFALSEFALSEFALSEFALSEFALSEFALSEFALSEFALSEFALSEFALSEFALSE	FALSEFALSEedeniteFALSEFALSEFALSEFALSEFALSEFALSEFALSEFALSEFALSEFALSEFALSEFALSEFALSEFALSE	FALSEFALSEedeniteFALSEFALSEFALSEFALSEFALSEFALSEFALSEFALSEFALSEFALSEFALSEFALSEFALSEFALSE	FALSEFALSEedeniteFALSEFALSEFALSEFALSEFALSEFALSEFALSEFALSEFALSEFALSEFALSEFALSEFALSEFALSE	FALSEFALSEedeniteFALSEFALSEFALSEFALSEFALSEFALSEFALSEFALSEFALSEFALSEFALSEFALSEFALSEFALSE	silicic edeniteFALSEFALSEFALSEFALSEFALSEFALSEFALSEFALSEFALSEFALSEFALSEFALSEFALSEFALSEFALSEFALSE	FALSEFALSEedeniteFALSEFALSEFALSEFALSEFALSEFALSEFALSEFALSEFALSEFALSEFALSEFALSEFALSEFALSE	FALSEFALSEFALSEFALSEedenitic hornblendeFALSEFALSEFALSEFALSEFALSEFALSEFALSEFALSEFALSEFALSEFALSEFALSE	FALSEFALSEFALSEFALSEedenitic hornblendeFALSEFALSEFALSEFALSEFALSEFALSEFALSEFALSEFALSEFALSEFALSEFALSE	FALSEFALSEFALSEFALSEedenitic hornblendeFALSEFALSEFALSEFALSEFALSEFALSEFALSEFALSEFALSEFALSEFALSEFALSE	FALSEFALSEFALSEFALSEFALSEFALSEFALSEferroan pargasitic hornblendeFALSEFALSEFALSEFALSEFALSEFALSEFALSEFALSEFALSE	FALSEFALSEFALSEFALSEFALSEFALSEFALSEferroan pargasitic hornblendeFALSEFALSEFALSEFALSEFALSEFALSEFALSEFALSEFALSE	FALSEFALSEFALSEFALSEFALSEFALSEFALSEferroan pargasitic hornblendeFALSEFALSEFALSEFALSEFALSEFALSEFALSEFALSEFALSE	FALSEFALSEFALSEFALSEedenitic hornblendeFALSEFALSEFALSEFALSEFALSEFALSEFALSEFALSEFALSEFALSEFALSEFALSE	FALSEFALSEFALSEFALSEFALSEFALSEFALSEferroan pargasitic hornblendeFALSEFALSEFALSEFALSEFALSEFALSEFALSEFALSEFALSE	FALSEFALSEFALSEFALSEedenitic hornblendeFALSEFALSEFALSEFALSEFALSEFALSEFALSEFALSEFALSEFALSEFALSEFALSE	FALSEFALSEFALSEFALSEedenitic hornblendeFALSEFALSEFALSEFALSEFALSEFALSEFALSEFALSEFALSEFALSEFALSEFALSE	FALSEFALSEFALSEFALSEedenitic hornblendeFALSEFALSEFALSEFALSEFALSEFALSEFALSEFALSEFALSEFALSEFALSEFALSE	FALSEFALSEFALSEFALSEedenitic hornblendeFALSEFALSEFALSEFALSEFALSEFALSEFALSEFALSEFALSEFALSEFALSEFALSE	FALSEFALSEFALSEFALSEFALSEFALSEFALSEferroan pargasitic hornblendeFALSEFALSEFALSEFALSEFALSEFALSEFALSEFALSEFALSE	FALSEFALSEFALSEFALSEFALSEFALSEFALSEferroan pargasitic hornblendeFALSEFALSEFALSEFALSEFALSEFALSEFALSEFALSEFALSE	FALSEFALSEFALSEFALSEFALSEFALSEFALSEferroan pargasitic hornblendeFALSEFALSEFALSEFALSEFALSEFALSEFALSEFALSEFALSE	FALSEFALSEFALSEFALSEFALSEFALSEFALSEferroan pargasitic hornblendeFALSEFALSEFALSEFALSEFALSEFALSEFALSEFALSEFALSE	FALSEFALSEFALSEFALSEFALSEFALSEFALSEferroan pargasitic hornblendeFALSEFALSEFALSEFALSEFALSEFALSEFALSEFALSEFALSE	FALSEFALSEFALSEFALSEFALSEFALSEFALSEferroan pargasitic hornblendeFALSEFALSEFALSEFALSEFALSEFALSEFALSEFALSEFALSE	FALSEFALSEFALSEFALSEedenitic hornblendeFALSEFALSEFALSEFALSEFALSEFALSEFALSEFALSEFALSEFALSEFALSEFALSE	FALSEFALSEFALSEFALSEFALSEFALSEpargasitic hornblendeFALSEFALSEFALSEFALSEFALSEFALSEFALSEFALSEFALSEFALSE	FALSEFALSEFALSEFALSEFALSEFALSEpargasitic hornblendeFALSEFALSEFALSEFALSEFALSEFALSEFALSEFALSEFALSEFALSE	FALSEFALSEFALSEFALSEFALSEFALSEpargasitic hornblendeFALSEFALSEFALSEFALSEFALSEFALSEFALSEFALSEFALSEFALSE	FALSEFALSEFALSEFALSEFALSEFALSEpargasitic hornblendeFALSEFALSEFALSEFALSEFALSEFALSEFALSEFALSEFALSEFALSE
	edenitic hornblende	edenite	edenitic hornblende	edenitic hornblende	edenitic hornblende	ferroan pargasitic hornblende	ferroan pargasitic hornblende	ferroan pargasitic hornblende	silicic edenite	silicic edenite	silicic edenite	edenite	edenite	edenite	ferroan pargasitic hornblende	ferroan pargasitic hornblende	ferroan pargasitic hornblende	ferroan pargasitic hornblende	edenitic hornblende	edenitic hornblende	edenite	edenite	edenite	edenite	silicic edenite	edenite	edenitic hornblende	edenitic hornblende	edenitic hornblende	ferroan pargasitic hornblende	ferroan pargasitic hornblende	ferroan pargasitic hornblende	edenitic hornblende	ferroan pargasitic hornblende	edenitic hornblende	edenitic hornblende	edenitic hornblende	edenitic hornblende	ferroan pargasitic hornblende	ferroan pargasitic hornblende	ferroan pargasitic hornblende	ferroan pargasitic hornblende	ferroan pargasitic hornblende	ferroan pargasitic hornblende	edenitic hornblende	pargasitic hornblende	pargasitic hornblende	pargasitic hornblende	pargasitic hornblende
Ca diagram 3	FALSEFALSEFALSEFALSEedenitic hornblendeFALSEFALSEFALSEFALSEFALSEFALSEFALSEFALSEFALSEFALSE	FALSEFALSEedeniteFALSEFALSEFALSEFALSEFALSEFALSEFALSEFALSEFALSEFALSEFALSEFALSE	FALSEFALSEFALSEFALSEedenitic hornblendeFALSEFALSEFALSEFALSEFALSEFALSEFALSEFALSEFALSEFALSE	FALSEFALSEFALSEFALSEedenitic hornblendeFALSEFALSEFALSEFALSEFALSEFALSEFALSEFALSEFALSEFALSE	FALSEFALSEFALSEFALSEedenitic hornblendeFALSEFALSEFALSEFALSEFALSEFALSEFALSEFALSEFALSEFALSE	FALSEFALSEFALSEFALSEFALSEFALSEFALSEmagnesian hastingsitic hornblendeFALSEFALSEFALSEFALSEFALSEFALSEFALSE	FALSEFALSEFALSEFALSEFALSEFALSEFALSEmagnesian hastingsitic hornblendeFALSEFALSEFALSEFALSEFALSEFALSEFALSE	FALSEFALSEFALSEFALSEFALSEFALSEFALSEmagnesian hastingsitic hornblendeFALSEFALSEFALSEFALSEFALSEFALSEFALSE	silicic edeniteFALSEFALSEFALSEFALSEFALSEFALSEFALSEFALSEFALSEFALSEFALSEFALSEFALSEFALSE	silicic edeniteFALSEFALSEFALSEFALSEFALSEFALSEFALSEFALSEFALSEFALSEFALSEFALSEFALSEFALSE	silicic edeniteFALSEFALSEFALSEFALSEFALSEFALSEFALSEFALSEFALSEFALSEFALSEFALSEFALSEFALSE	FALSEFALSEedeniteFALSEFALSEFALSEFALSEFALSEFALSEFALSEFALSEFALSEFALSEFALSEFALSE	FALSEFALSEedeniteFALSEFALSEFALSEFALSEFALSEFALSEFALSEFALSEFALSEFALSEFALSEFALSE	FALSEFALSEedeniteFALSEFALSEFALSEFALSEFALSEFALSEFALSEFALSEFALSEFALSEFALSEFALSE	FALSEFALSEFALSEFALSEFALSEFALSEFALSEmagnesian hastingsitic hornblendeFALSEFALSEFALSEFALSEFALSEFALSEFALSE	FALSEFALSEFALSEFALSEFALSEFALSEFALSEmagnesian hastingsitic hornblendeFALSEFALSEFALSEFALSEFALSEFALSEFALSE	FALSEFALSEFALSEFALSEFALSEFALSEFALSEmagnesian hastingsitic hornblendeFALSEFALSEFALSEFALSEFALSEFALSEFALSE	FALSEFALSEFALSEFALSEFALSEFALSEFALSEmagnesian hastingsitic hornblendeFALSEFALSEFALSEFALSEFALSEFALSEFALSE	FALSEFALSEFALSEFALSEedenitic hornblendeFALSEFALSEFALSEFALSEFALSEFALSEFALSEFALSEFALSEFALSE	FALSEFALSEFALSEFALSEedenitic hornblendeFALSEFALSEFALSEFALSEFALSEFALSEFALSEFALSEFALSEFALSE	FALSEFALSEedeniteFALSEFALSEFALSEFALSEFALSEFALSEFALSEFALSEFALSEFALSEFALSEFALSE	FALSEFALSEedeniteFALSEFALSEFALSEFALSEFALSEFALSEFALSEFALSEFALSEFALSEFALSEFALSE	FALSEFALSEedeniteFALSEFALSEFALSEFALSEFALSEFALSEFALSEFALSEFALSEFALSEFALSEFALSE	FALSEFALSEedeniteFALSEFALSEFALSEFALSEFALSEFALSEFALSEFALSEFALSEFALSEFALSEFALSE	silicic edeniteFALSEFALSEFALSEFALSEFALSEFALSEFALSEFALSEFALSEFALSEFALSEFALSEFALSEFALSE	FALSEFALSEedeniteFALSEFALSEFALSEFALSEFALSEFALSEFALSEFALSEFALSEFALSEFALSEFALSE	FALSEFALSEFALSEFALSEedenitic hornblendeFALSEFALSEFALSEFALSEFALSEFALSEFALSEFALSEFALSEFALSE	FALSEFALSEFALSEFALSEedenitic hornblendeFALSEFALSEFALSEFALSEFALSEFALSEFALSEFALSEFALSEFALSE	FALSEFALSEFALSEFALSEedenitic hornblendeFALSEFALSEFALSEFALSEFALSEFALSEFALSEFALSEFALSEFALSE	FALSEFALSEFALSEFALSEFALSEFALSEFALSEmagnesian hastingsitic hornblendeFALSEFALSEFALSEFALSEFALSEFALSEFALSE	FALSEFALSEFALSEFALSEFALSEFALSEFALSEmagnesian hastingsitic hornblendeFALSEFALSEFALSEFALSEFALSEFALSEFALSE	FALSEFALSEFALSEFALSEFALSEFALSEFALSEmagnesian hastingsitic hornblendeFALSEFALSEFALSEFALSEFALSEFALSEFALSE	FALSEFALSEFALSEFALSEedenitic hornblendeFALSEFALSEFALSEFALSEFALSEFALSEFALSEFALSEFALSEFALSE	FALSEFALSEFALSEFALSEFALSEFALSEFALSEmagnesian hastingsitic hornblendeFALSEFALSEFALSEFALSEFALSEFALSEFALSE	FALSEFALSEFALSEFALSEedenitic hornblendeFALSEFALSEFALSEFALSEFALSEFALSEFALSEFALSEFALSEFALSE	FALSEFALSEFALSEFALSEedenitic hornblendeFALSEFALSEFALSEFALSEFALSEFALSEFALSEFALSEFALSEFALSE	FALSEFALSEFALSEFALSEedenitic hornblendeFALSEFALSEFALSEFALSEFALSEFALSEFALSEFALSEFALSEFALSE	FALSEFALSEFALSEFALSEedenitic hornblendeFALSEFALSEFALSEFALSEFALSEFALSEFALSEFALSEFALSEFALSE	FALSEFALSEFALSEFALSEFALSEFALSEFALSEmagnesian hastingsitic hornblendeFALSEFALSEFALSEFALSEFALSEFALSEFALSE	FALSEFALSEFALSEFALSEFALSEFALSEFALSEmagnesian hastingsitic hornblendeFALSEFALSEFALSEFALSEFALSEFALSEFALSE	FALSEFALSEFALSEFALSEFALSEFALSEFALSEmagnesian hastingsitic hornblendeFALSEFALSEFALSEFALSEFALSEFALSEFALSE	FALSEFALSEFALSEFALSEFALSEFALSEFALSEmagnesian hastingsitic hornblendeFALSEFALSEFALSEFALSEFALSEFALSEFALSE	FALSEFALSEFALSEFALSEFALSEFALSEFALSEmagnesian hastingsitic hornblendeFALSEFALSEFALSEFALSEFALSEFALSEFALSE	FALSEFALSEFALSEFALSEFALSEFALSEFALSEmagnesian hastingsitic hornblendeFALSEFALSEFALSEFALSEFALSEFALSEFALSE	FALSEFALSEFALSEFALSEedenitic hornblendeFALSEFALSEFALSEFALSEFALSEFALSEFALSEFALSEFALSEFALSE	FALSEFALSEFALSEFALSEFALSEFALSEmagnesio-hastingsitic hornblendeFALSEFALSEFALSEFALSEFALSEFALSEFALSEFALSE	FALSEFALSEFALSEFALSEFALSEFALSEmagnesio-hastingsitic hornblendeFALSEFALSEFALSEFALSEFALSEFALSEFALSEFALSE	FALSEFALSEFALSEFALSEFALSEFALSEmagnesio-hastingsitic hornblendeFALSEFALSEFALSEFALSEFALSEFALSEFALSEFALSE	FALSEFALSEFALSEFALSEFALSEFALSEmagnesio-hastingsitic hornblendeFALSEFALSEFALSEFALSEFALSEFALSEFALSEFALSE
	edenitic hornblende	edenite	edenitic hornblende	edenitic hornblende	edenitic hornblende	magnesian hastingsitic hornblende	magnesian hastingsitic hornblende	magnesian hastingsitic hornblende	silicic edenite	silicic edenite	silicic edenite	edenite	edenite	edenite	magnesian hastingsitic hornblende	magnesian hastingsitic hornblende	magnesian hastingsitic hornblende	magnesian hastingsitic hornblende	edenitic hornblende	edenitic hornblende	edenite	edenite	edenite	edenite	silicic edenite	edenite	edenitic hornblende	edenitic hornblende	edenitic hornblende	magnesian hastingsitic hornblende	magnesian hastingsitic hornblende	magnesian hastingsitic hornblende	edenitic hornblende	magnesian hastingsitic hornblende	edenitic hornblende	edenitic hornblende	edenitic hornblende	edenitic hornblende	magnesian hastingsitic hornblende	magnesian hastingsitic hornblende	magnesian hastingsitic hornblende	magnesian hastingsitic hornblende	magnesian hastingsitic hornblende	magnesian hastingsitic hornblende	edenitic hornblende	magnesio-hastingsitic hornblende	magnesio-hastingsitic hornblende	magnesio-hastingsitic hornblende	magnesio-hastingsitic hornblende
Ca diagram 4	FALSE	FALSE	FALSE	FALSE	FALSE	kaersutite	kaersutite	kaersutite	FALSE	FALSE	FALSE	FALSE	FALSE	FALSE	kaersutite	kaersutite	kaersutite	kaersutite	FALSE	FALSE	FALSE	FALSE	FALSE	FALSE	FALSE	FALSE	FALSE	FALSE	FALSE	kaersutite	kaersutite	kaersutite	FALSE	kaersutite	FALSE	FALSE	FALSE	FALSE	kaersutite	kaersutite	kaersutite	kaersutite	kaersutite	kaersutite	FALSE	kaersutite	kaersutite	kaersutite	kaersutite
Fe-Mg-Mn orthorhombic diagram	gedrite	anthophyllite	gedrite	gedrite	gedrite	gedrite	gedrite	gedrite	anthophyllite	anthophyllite	anthophyllite	anthophyllite	anthophyllite	anthophyllite	gedrite	gedrite	gedrite	gedrite	gedrite	gedrite	gedrite	gedrite	gedrite	gedrite	anthophyllite	anthophyllite	gedrite	gedrite	gedrite	gedrite	gedrite	gedrite	gedrite	gedrite	gedrite	gedrite	gedrite	gedrite	gedrite	gedrite	gedrite	gedrite	gedrite	gedrite	gedrite	gedrite	gedrite	gedrite	gedrite
Fe-Mg-Mn monoclinic diagram	cummingtonite	magnesio-cummingtonite	cummingtonite	cummingtonite	cummingtonite	cummingtonite	cummingtonite	cummingtonite	magnesio-cummingtonite	magnesio-cummingtonite	magnesio-cummingtonite	magnesio-cummingtonite	magnesio-cummingtonite	magnesio-cummingtonite	cummingtonite	cummingtonite	cummingtonite	cummingtonite	cummingtonite	magnesio-cummingtonite	magnesio-cummingtonite	magnesio-cummingtonite	magnesio-cummingtonite	cummingtonite	magnesio-cummingtonite	cummingtonite	cummingtonite	cummingtonite	cummingtonite	cummingtonite	cummingtonite	cummingtonite	cummingtonite	cummingtonite	cummingtonite	cummingtonite	cummingtonite	magnesio-cummingtonite	cummingtonite	cummingtonite	cummingtonite	cummingtonite	cummingtonite	cummingtonite	magnesio-cummingtonite	magnesio-cummingtonite	magnesio-cummingtonite	magnesio-cummingtonite	magnesio-cummingtonite
Na-Ca diagram 1	barroisite	barroisite	barroisite	barroisite	barroisite	FALSE	FALSE	FALSE	barroisite	winchite	winchite	barroisite	barroisite	barroisite	FALSE	FALSE	FALSE	FALSE	barroisite	barroisite	barroisite	barroisite	barroisite	barroisite	barroisite	barroisite	barroisite	barroisite	barroisite	FALSE	FALSE	FALSE	barroisite	FALSE	barroisite	barroisite	barroisite	barroisite	FALSE	FALSE	FALSE	FALSE	FALSE	FALSE	barroisite	FALSE	FALSE	FALSE	FALSE
Na-Ca diagram 2	magnesio-kataphorite	magnesio-kataphorite	magnesio-kataphorite	magnesio-kataphorite	magnesio-kataphorite	FALSE	FALSE	FALSE	magnesio-kataphorite	richterite	richterite	magnesio-kataphorite	magnesio-kataphorite	magnesio-kataphorite	FALSE	FALSE	FALSE	FALSE	magnesio-kataphorite	magnesio-kataphorite	magnesio-kataphorite	magnesio-kataphorite	magnesio-kataphorite	magnesio-kataphorite	magnesio-kataphorite	magnesio-kataphorite	magnesio-kataphorite	magnesio-kataphorite	magnesio-kataphorite	FALSE	FALSE	FALSE	magnesio-kataphorite	FALSE	magnesio-kataphorite	magnesio-kataphorite	magnesio-kataphorite	magnesio-kataphorite	FALSE	FALSE	FALSE	FALSE	FALSE	FALSE	magnesio-kataphorite	FALSE	FALSE	FALSE	FALSE
Alkali diagram 1	anophorite	anophorite	nyboite	anophorite	nyboite	FALSE	FALSE	FALSE	nyboite	nyboite	anophorite	anophorite	anophorite	anophorite	FALSE	FALSE	FALSE	FALSE	anophorite	anophorite	anophorite	anophorite	anophorite	anophorite	nyboite	anophorite	anophorite	anophorite	anophorite	FALSE	FALSE	FALSE	anophorite	FALSE	anophorite	anophorite	anophorite	anophorite	FALSE	FALSE	FALSE	FALSE	FALSE	FALSE	nyboite	FALSE	FALSE	FALSE	FALSE
Alkali diagram 2	crossite	crossite	crossite	crossite	crossite	crossite	crossite	crossite	crossite	crossite	magnesio-riebeckite	crossite	crossite	magnesio-riebeckite	crossite	crossite	crossite	crossite	crossite	crossite	crossite	crossite	crossite	crossite	crossite	crossite	crossite	crossite	crossite	crossite	crossite	crossite	crossite	crossite	crossite	crossite	crossite	magnesio-riebeckite	crossite	crossite	crossite	crossite	crossite	crossite	crossite	crossite	crossite	crossite	crossite
Alkali diagram 3	magnesio-arfvedsonite	magnesio-arfvedsonite	eckermannite	magnesio-arfvedsonite	eckermannite	magnesio-arfvedsonite	magnesio-arfvedsonite	eckermannite	eckermannite	eckermannite	magnesio-arfvedsonite	magnesio-arfvedsonite	magnesio-arfvedsonite	magnesio-arfvedsonite	magnesio-arfvedsonite	magnesio-arfvedsonite	magnesio-arfvedsonite	magnesio-arfvedsonite	magnesio-arfvedsonite	magnesio-arfvedsonite	magnesio-arfvedsonite	magnesio-arfvedsonite	magnesio-arfvedsonite	magnesio-arfvedsonite	eckermannite	magnesio-arfvedsonite	magnesio-arfvedsonite	magnesio-arfvedsonite	magnesio-arfvedsonite	magnesio-arfvedsonite	eckermannite	magnesio-arfvedsonite	magnesio-arfvedsonite	magnesio-arfvedsonite	magnesio-arfvedsonite	magnesio-arfvedsonite	magnesio-arfvedsonite	magnesio-arfvedsonite	magnesio-arfvedsonite	magnesio-arfvedsonite	magnesio-arfvedsonite	magnesio-arfvedsonite	magnesio-arfvedsonite	magnesio-arfvedsonite	eckermannite	eckermannite	eckermannite	eckermannite	magnesio-arfvedsonite
Alkali diagram 4 (kozulite)	FALSE	FALSE	FALSE	FALSE	FALSE	FALSE	FALSE	FALSE	FALSE	FALSE	FALSE	FALSE	FALSE	FALSE	FALSE	FALSE	FALSE	FALSE	FALSE	FALSE	FALSE	FALSE	FALSE	FALSE	FALSE	FALSE	FALSE	FALSE	FALSE	FALSE	FALSE	FALSE	FALSE	FALSE	FALSE	FALSE	FALSE	FALSE	FALSE	FALSE	FALSE	FALSE	FALSE	FALSE	FALSE	FALSE	FALSE	FALSE	FALSE
Part 13. Select TRUE name for each group
Ca amph definition	magnesio-hornblende	magnesio-hornblende	magnesio-hornblende	FALSE	FALSE	FALSE	tschermakitic hornblende	FALSE	actinolitic hornblende	actinolite	actinolite	magnesio-hornblende	magnesio-hornblende	magnesio-hornblende	FALSE	tschermakitic hornblende	tschermakitic hornblende	tschermakitic hornblende	magnesio-hornblende	magnesio-hornblende	magnesio-hornblende	magnesio-hornblende	magnesio-hornblende	magnesio-hornblende	actinolitic hornblende	magnesio-hornblende	magnesio-hornblende	magnesio-hornblende	magnesio-hornblende	FALSE	FALSE	FALSE	FALSE	FALSE	FALSE	magnesio-hornblende	magnesio-hornblende	magnesio-hornblende	FALSE	tschermakitic hornblende	tschermakitic hornblende	tschermakitic hornblende	FALSE	FALSE	FALSE	FALSE	tschermakitic hornblende	FALSE	FALSE
	FALSE	FALSE	FALSE	FALSE	edenitic hornblende	FALSE	FALSE	ferroan pargasitic hornblende	FALSE	FALSE	FALSE	FALSE	FALSE	FALSE	FALSE	FALSE	FALSE	FALSE	FALSE	FALSE	FALSE	FALSE	FALSE	FALSE	FALSE	FALSE	FALSE	FALSE	FALSE	FALSE	ferroan pargasitic hornblende	FALSE	FALSE	FALSE	FALSE	FALSE	FALSE	FALSE	FALSE	FALSE	FALSE	FALSE	FALSE	FALSE	edenitic hornblende	pargasitic hornblende	FALSE	pargasitic hornblende	FALSE
	FALSE	FALSE	FALSE	edenitic hornblende	FALSE	magnesian hastingsitic hornblende	FALSE	FALSE	FALSE	FALSE	FALSE	FALSE	FALSE	FALSE	magnesian hastingsitic hornblende	FALSE	FALSE	FALSE	FALSE	FALSE	FALSE	FALSE	FALSE	FALSE	FALSE	FALSE	FALSE	FALSE	FALSE	magnesian hastingsitic hornblende	FALSE	magnesian hastingsitic hornblende	edenitic hornblende	magnesian hastingsitic hornblende	edenitic hornblende	FALSE	FALSE	FALSE	magnesian hastingsitic hornblende	FALSE	FALSE	FALSE	magnesian hastingsitic hornblende	magnesian hastingsitic hornblende	FALSE	FALSE	FALSE	FALSE	magnesio-hastingsitic hornblende
	FALSE	FALSE	FALSE	FALSE	FALSE	FALSE	FALSE	FALSE	FALSE	FALSE	FALSE	FALSE	FALSE	FALSE	FALSE	FALSE	FALSE	FALSE	FALSE	FALSE	FALSE	FALSE	FALSE	FALSE	FALSE	FALSE	FALSE	FALSE	FALSE	FALSE	FALSE	FALSE	FALSE	FALSE	FALSE	FALSE	FALSE	FALSE	FALSE	FALSE	FALSE	FALSE	FALSE	FALSE	FALSE	FALSE	FALSE	FALSE	FALSE
Fe-Mg-Mn definition	FALSE	FALSE	FALSE	FALSE	FALSE	FALSE	FALSE	FALSE	FALSE	FALSE	FALSE	FALSE	FALSE	FALSE	FALSE	FALSE	FALSE	FALSE	FALSE	FALSE	FALSE	FALSE	FALSE	FALSE	FALSE	FALSE	FALSE	FALSE	FALSE	FALSE	FALSE	FALSE	FALSE	FALSE	FALSE	FALSE	FALSE	FALSE	FALSE	FALSE	FALSE	FALSE	FALSE	FALSE	FALSE	FALSE	FALSE	FALSE	FALSE
	cummingtonite	magnesio-cummingtonite	cummingtonite	cummingtonite	cummingtonite	cummingtonite	cummingtonite	cummingtonite	magnesio-cummingtonite	magnesio-cummingtonite	magnesio-cummingtonite	magnesio-cummingtonite	magnesio-cummingtonite	magnesio-cummingtonite	cummingtonite	cummingtonite	cummingtonite	cummingtonite	cummingtonite	magnesio-cummingtonite	magnesio-cummingtonite	magnesio-cummingtonite	magnesio-cummingtonite	cummingtonite	magnesio-cummingtonite	cummingtonite	cummingtonite	cummingtonite	cummingtonite	cummingtonite	cummingtonite	cummingtonite	cummingtonite	cummingtonite	cummingtonite	cummingtonite	cummingtonite	magnesio-cummingtonite	cummingtonite	cummingtonite	cummingtonite	cummingtonite	cummingtonite	cummingtonite	magnesio-cummingtonite	magnesio-cummingtonite	magnesio-cummingtonite	magnesio-cummingtonite	magnesio-cummingtonite
Na-Ca amph definition	FALSE	FALSE	FALSE	FALSE	FALSE	FALSE	FALSE	FALSE	FALSE	FALSE	FALSE	FALSE	FALSE	FALSE	FALSE	FALSE	FALSE	FALSE	FALSE	FALSE	FALSE	FALSE	FALSE	FALSE	FALSE	FALSE	FALSE	FALSE	FALSE	FALSE	FALSE	FALSE	FALSE	FALSE	FALSE	FALSE	FALSE	FALSE	FALSE	FALSE	FALSE	FALSE	FALSE	FALSE	FALSE	FALSE	FALSE	FALSE	FALSE
	FALSE	FALSE	FALSE	FALSE	FALSE	FALSE	FALSE	FALSE	FALSE	FALSE	FALSE	FALSE	FALSE	FALSE	FALSE	FALSE	FALSE	FALSE	FALSE	FALSE	FALSE	FALSE	FALSE	FALSE	FALSE	FALSE	FALSE	FALSE	FALSE	FALSE	FALSE	FALSE	FALSE	FALSE	FALSE	FALSE	FALSE	FALSE	FALSE	FALSE	FALSE	FALSE	FALSE	FALSE	FALSE	FALSE	FALSE	FALSE	FALSE
Alkali amph definition	FALSE	FALSE	FALSE	FALSE	FALSE	FALSE	FALSE	FALSE	FALSE	FALSE	FALSE	FALSE	FALSE	FALSE	FALSE	FALSE	FALSE	FALSE	FALSE	FALSE	FALSE	FALSE	FALSE	FALSE	FALSE	FALSE	FALSE	FALSE	FALSE	FALSE	FALSE	FALSE	FALSE	FALSE	FALSE	FALSE	FALSE	FALSE	FALSE	FALSE	FALSE	FALSE	FALSE	FALSE	FALSE	FALSE	FALSE	FALSE	FALSE
	FALSE	FALSE	FALSE	FALSE	FALSE	FALSE	FALSE	FALSE	FALSE	FALSE	FALSE	FALSE	FALSE	FALSE	FALSE	FALSE	FALSE	FALSE	FALSE	FALSE	FALSE	FALSE	FALSE	FALSE	FALSE	FALSE	FALSE	FALSE	FALSE	FALSE	FALSE	FALSE	FALSE	FALSE	FALSE	FALSE	FALSE	FALSE	FALSE	FALSE	FALSE	FALSE	FALSE	FALSE	FALSE	FALSE	FALSE	FALSE	FALSE
	FALSE	FALSE	FALSE	FALSE	FALSE	FALSE	FALSE	FALSE	FALSE	FALSE	FALSE	FALSE	FALSE	FALSE	FALSE	FALSE	FALSE	FALSE	FALSE	FALSE	FALSE	FALSE	FALSE	FALSE	FALSE	FALSE	FALSE	FALSE	FALSE	FALSE	FALSE	FALSE	FALSE	FALSE	FALSE	FALSE	FALSE	FALSE	FALSE	FALSE	FALSE	FALSE	FALSE	FALSE	FALSE	FALSE	FALSE	FALSE	FALSE
	FALSE	FALSE	FALSE	FALSE	FALSE	FALSE	FALSE	FALSE	FALSE	FALSE	FALSE	FALSE	FALSE	FALSE	FALSE	FALSE	FALSE	FALSE	FALSE	FALSE	FALSE	FALSE	FALSE	FALSE	FALSE	FALSE	FALSE	FALSE	FALSE	FALSE	FALSE	FALSE	FALSE	FALSE	FALSE	FALSE	FALSE	FALSE	FALSE	FALSE	FALSE	FALSE	FALSE	FALSE	FALSE	FALSE	FALSE	FALSE	FALSE
Part 14. Decide on fundamental name
Which calcic amphibole	magnesio-hornblendeFALSEFALSEFALSE	magnesio-hornblendeFALSEFALSEFALSE	magnesio-hornblendeFALSEFALSEFALSE	FALSEFALSEedenitic hornblendeFALSE	FALSEedenitic hornblendeFALSEFALSE	FALSEFALSEmagnesian hastingsitic hornblendeFALSE	tschermakitic hornblendeFALSEFALSEFALSE	FALSEferroan pargasitic hornblendeFALSEFALSE	actinolitic hornblendeFALSEFALSEFALSE	actinoliteFALSEFALSEFALSE	actinoliteFALSEFALSEFALSE	magnesio-hornblendeFALSEFALSEFALSE	magnesio-hornblendeFALSEFALSEFALSE	magnesio-hornblendeFALSEFALSEFALSE	FALSEFALSEmagnesian hastingsitic hornblendeFALSE	tschermakitic hornblendeFALSEFALSEFALSE	tschermakitic hornblendeFALSEFALSEFALSE	tschermakitic hornblendeFALSEFALSEFALSE	magnesio-hornblendeFALSEFALSEFALSE	magnesio-hornblendeFALSEFALSEFALSE	magnesio-hornblendeFALSEFALSEFALSE	magnesio-hornblendeFALSEFALSEFALSE	magnesio-hornblendeFALSEFALSEFALSE	magnesio-hornblendeFALSEFALSEFALSE	actinolitic hornblendeFALSEFALSEFALSE	magnesio-hornblendeFALSEFALSEFALSE	magnesio-hornblendeFALSEFALSEFALSE	magnesio-hornblendeFALSEFALSEFALSE	magnesio-hornblendeFALSEFALSEFALSE	FALSEFALSEmagnesian hastingsitic hornblendeFALSE	FALSEferroan pargasitic hornblendeFALSEFALSE	FALSEFALSEmagnesian hastingsitic hornblendeFALSE	FALSEFALSEedenitic hornblendeFALSE	FALSEFALSEmagnesian hastingsitic hornblendeFALSE	FALSEFALSEedenitic hornblendeFALSE	magnesio-hornblendeFALSEFALSEFALSE	magnesio-hornblendeFALSEFALSEFALSE	magnesio-hornblendeFALSEFALSEFALSE	FALSEFALSEmagnesian hastingsitic hornblendeFALSE	tschermakitic hornblendeFALSEFALSEFALSE	tschermakitic hornblendeFALSEFALSEFALSE	tschermakitic hornblendeFALSEFALSEFALSE	FALSEFALSEmagnesian hastingsitic hornblendeFALSE	FALSEFALSEmagnesian hastingsitic hornblendeFALSE	FALSEedenitic hornblendeFALSEFALSE	FALSEpargasitic hornblendeFALSEFALSE	tschermakitic hornblendeFALSEFALSEFALSE	FALSEpargasitic hornblendeFALSEFALSE	FALSEFALSEmagnesio-hastingsitic hornblendeFALSE
	magnesio-hornblende	magnesio-hornblende	magnesio-hornblende	edenitic hornblende	edenitic hornblende	magnesian hastingsitic hornblende	tschermakitic hornblende	ferroan pargasitic hornblende	actinolitic hornblende	actinolite	actinolite	magnesio-hornblende	magnesio-hornblende	magnesio-hornblende	magnesian hastingsitic hornblende	tschermakitic hornblende	tschermakitic hornblende	tschermakitic hornblende	magnesio-hornblende	magnesio-hornblende	magnesio-hornblende	magnesio-hornblende	magnesio-hornblende	magnesio-hornblende	actinolitic hornblende	magnesio-hornblende	magnesio-hornblende	magnesio-hornblende	magnesio-hornblende	magnesian hastingsitic hornblende	ferroan pargasitic hornblende	magnesian hastingsitic hornblende	edenitic hornblende	magnesian hastingsitic hornblende	edenitic hornblende	magnesio-hornblende	magnesio-hornblende	magnesio-hornblende	magnesian hastingsitic hornblende	tschermakitic hornblende	tschermakitic hornblende	tschermakitic hornblende	magnesian hastingsitic hornblende	magnesian hastingsitic hornblende	edenitic hornblende	pargasitic hornblende	tschermakitic hornblende	pargasitic hornblende	magnesio-hastingsitic hornblende
Which Fe-Mg-Mn amphibole	FALSE	FALSE	FALSE	FALSE	FALSE	FALSE	FALSE	FALSE	FALSE	FALSE	FALSE	FALSE	FALSE	FALSE	FALSE	FALSE	FALSE	FALSE	FALSE	FALSE	FALSE	FALSE	FALSE	FALSE	FALSE	FALSE	FALSE	FALSE	FALSE	FALSE	FALSE	FALSE	FALSE	FALSE	FALSE	FALSE	FALSE	FALSE	FALSE	FALSE	FALSE	FALSE	FALSE	FALSE	FALSE	FALSE	FALSE	FALSE	FALSE
Which Na-Ca amphibole	FALSEFALSE	FALSEFALSE	FALSEFALSE	FALSEFALSE	FALSEFALSE	FALSEFALSE	FALSEFALSE	FALSEFALSE	FALSEFALSE	FALSEFALSE	FALSEFALSE	FALSEFALSE	FALSEFALSE	FALSEFALSE	FALSEFALSE	FALSEFALSE	FALSEFALSE	FALSEFALSE	FALSEFALSE	FALSEFALSE	FALSEFALSE	FALSEFALSE	FALSEFALSE	FALSEFALSE	FALSEFALSE	FALSEFALSE	FALSEFALSE	FALSEFALSE	FALSEFALSE	FALSEFALSE	FALSEFALSE	FALSEFALSE	FALSEFALSE	FALSEFALSE	FALSEFALSE	FALSEFALSE	FALSEFALSE	FALSEFALSE	FALSEFALSE	FALSEFALSE	FALSEFALSE	FALSEFALSE	FALSEFALSE	FALSEFALSE	FALSEFALSE	FALSEFALSE	FALSEFALSE	FALSEFALSE	FALSEFALSE
Which alkali amphibole	FALSEFALSEFALSEFALSE	FALSEFALSEFALSEFALSE	FALSEFALSEFALSEFALSE	FALSEFALSEFALSEFALSE	FALSEFALSEFALSEFALSE	FALSEFALSEFALSEFALSE	FALSEFALSEFALSEFALSE	FALSEFALSEFALSEFALSE	FALSEFALSEFALSEFALSE	FALSEFALSEFALSEFALSE	FALSEFALSEFALSEFALSE	FALSEFALSEFALSEFALSE	FALSEFALSEFALSEFALSE	FALSEFALSEFALSEFALSE	FALSEFALSEFALSEFALSE	FALSEFALSEFALSEFALSE	FALSEFALSEFALSEFALSE	FALSEFALSEFALSEFALSE	FALSEFALSEFALSEFALSE	FALSEFALSEFALSEFALSE	FALSEFALSEFALSEFALSE	FALSEFALSEFALSEFALSE	FALSEFALSEFALSEFALSE	FALSEFALSEFALSEFALSE	FALSEFALSEFALSEFALSE	FALSEFALSEFALSEFALSE	FALSEFALSEFALSEFALSE	FALSEFALSEFALSEFALSE	FALSEFALSEFALSEFALSE	FALSEFALSEFALSEFALSE	FALSEFALSEFALSEFALSE	FALSEFALSEFALSEFALSE	FALSEFALSEFALSEFALSE	FALSEFALSEFALSEFALSE	FALSEFALSEFALSEFALSE	FALSEFALSEFALSEFALSE	FALSEFALSEFALSEFALSE	FALSEFALSEFALSEFALSE	FALSEFALSEFALSEFALSE	FALSEFALSEFALSEFALSE	FALSEFALSEFALSEFALSE	FALSEFALSEFALSEFALSE	FALSEFALSEFALSEFALSE	FALSEFALSEFALSEFALSE	FALSEFALSEFALSEFALSE	FALSEFALSEFALSEFALSE	FALSEFALSEFALSEFALSE	FALSEFALSEFALSEFALSE	FALSEFALSEFALSEFALSE
	magnesio-hornblendeFALSE	magnesio-hornblendeFALSE	magnesio-hornblendeFALSE	edenitic hornblendeFALSE	edenitic hornblendeFALSE	magnesian hastingsitic hornblendeFALSE	tschermakitic hornblendeFALSE	ferroan pargasitic hornblendeFALSE	actinolitic hornblendeFALSE	actinoliteFALSE	actinoliteFALSE	magnesio-hornblendeFALSE	magnesio-hornblendeFALSE	magnesio-hornblendeFALSE	magnesian hastingsitic hornblendeFALSE	tschermakitic hornblendeFALSE	tschermakitic hornblendeFALSE	tschermakitic hornblendeFALSE	magnesio-hornblendeFALSE	magnesio-hornblendeFALSE	magnesio-hornblendeFALSE	magnesio-hornblendeFALSE	magnesio-hornblendeFALSE	magnesio-hornblendeFALSE	actinolitic hornblendeFALSE	magnesio-hornblendeFALSE	magnesio-hornblendeFALSE	magnesio-hornblendeFALSE	magnesio-hornblendeFALSE	magnesian hastingsitic hornblendeFALSE	ferroan pargasitic hornblendeFALSE	magnesian hastingsitic hornblendeFALSE	edenitic hornblendeFALSE	magnesian hastingsitic hornblendeFALSE	edenitic hornblendeFALSE	magnesio-hornblendeFALSE	magnesio-hornblendeFALSE	magnesio-hornblendeFALSE	magnesian hastingsitic hornblendeFALSE	tschermakitic hornblendeFALSE	tschermakitic hornblendeFALSE	tschermakitic hornblendeFALSE	magnesian hastingsitic hornblendeFALSE	magnesian hastingsitic hornblendeFALSE	edenitic hornblendeFALSE	pargasitic hornblendeFALSE	tschermakitic hornblendeFALSE	pargasitic hornblendeFALSE	magnesio-hastingsitic hornblendeFALSE
Which amphibole	magnesio-hornblende	magnesio-hornblende	magnesio-hornblende	edenitic hornblende	edenitic hornblende	magnesian hastingsitic hornblende	tschermakitic hornblende	ferroan pargasitic hornblende	actinolitic hornblende	actinolite	actinolite	magnesio-hornblende	magnesio-hornblende	magnesio-hornblende	magnesian hastingsitic hornblende	tschermakitic hornblende	tschermakitic hornblende	tschermakitic hornblende	magnesio-hornblende	magnesio-hornblende	magnesio-hornblende	magnesio-hornblende	magnesio-hornblende	magnesio-hornblende	actinolitic hornblende	magnesio-hornblende	magnesio-hornblende	magnesio-hornblende	magnesio-hornblende	magnesian hastingsitic hornblende	ferroan pargasitic hornblende	magnesian hastingsitic hornblende	edenitic hornblende	magnesian hastingsitic hornblende	edenitic hornblende	magnesio-hornblende	magnesio-hornblende	magnesio-hornblende	magnesian hastingsitic hornblende	tschermakitic hornblende	tschermakitic hornblende	tschermakitic hornblende	magnesian hastingsitic hornblende	magnesian hastingsitic hornblende	edenitic hornblende	pargasitic hornblende	tschermakitic hornblende	pargasitic hornblende	magnesio-hastingsitic hornblende
Part 15. Check for prefixes
chlor-	FALSE	FALSE	FALSE	FALSE	FALSE	FALSE	FALSE	FALSE	FALSE	FALSE	FALSE	FALSE	FALSE	FALSE	FALSE	FALSE	FALSE	FALSE	FALSE	FALSE	FALSE	FALSE	FALSE	FALSE	FALSE	FALSE	FALSE	FALSE	FALSE	FALSE	FALSE	FALSE	FALSE	FALSE	FALSE	FALSE	FALSE	FALSE	FALSE	FALSE	FALSE	FALSE	FALSE	FALSE	FALSE	FALSE	FALSE	FALSE	FALSE
chromium-	FALSE	FALSE	FALSE	FALSE	FALSE	FALSE	FALSE	FALSE	FALSE	FALSE	FALSE	FALSE	FALSE	FALSE	FALSE	FALSE	FALSE	FALSE	FALSE	FALSE	FALSE	FALSE	FALSE	FALSE	FALSE	FALSE	FALSE	FALSE	FALSE	FALSE	FALSE	FALSE	FALSE	FALSE	FALSE	FALSE	FALSE	FALSE	FALSE	FALSE	FALSE	FALSE	FALSE	FALSE	FALSE	FALSE	FALSE	FALSE	FALSE
chromian-	FALSE	FALSE	FALSE	FALSE	FALSE	FALSE	FALSE	FALSE	FALSE	FALSE	FALSE	FALSE	FALSE	FALSE	FALSE	FALSE	FALSE	FALSE	FALSE	FALSE	FALSE	FALSE	FALSE	FALSE	FALSE	FALSE	FALSE	FALSE	FALSE	FALSE	FALSE	FALSE	FALSE	FALSE	FALSE	FALSE	FALSE	FALSE	FALSE	FALSE	FALSE	FALSE	FALSE	FALSE	FALSE	FALSE	FALSE	FALSE	FALSE
check for hastingsites etc.	FALSE	FALSE	FALSE	FALSE	FALSE	hastingsites	FALSE	FALSE	FALSE	FALSE	FALSE	FALSE	FALSE	FALSE	hastingsites	FALSE	FALSE	FALSE	FALSE	FALSE	FALSE	FALSE	FALSE	FALSE	FALSE	FALSE	FALSE	FALSE	FALSE	hastingsites	FALSE	hastingsites	FALSE	hastingsites	FALSE	FALSE	FALSE	FALSE	hastingsites	FALSE	FALSE	FALSE	hastingsites	hastingsites	FALSE	FALSE	FALSE	FALSE	hastingsites
ferri-	FALSE	FALSE	FALSE	FALSE	FALSE	FALSE	FALSE	FALSE	FALSE	FALSE	FALSE	FALSE	FALSE	FALSE	FALSE	FALSE	FALSE	FALSE	FALSE	FALSE	FALSE	FALSE	FALSE	FALSE	FALSE	FALSE	FALSE	FALSE	FALSE	FALSE	FALSE	FALSE	FALSE	FALSE	FALSE	FALSE	FALSE	FALSE	FALSE	FALSE	FALSE	FALSE	FALSE	FALSE	FALSE	FALSE	FALSE	FALSE	FALSE
ferrian-	FALSE	FALSE	FALSE	FALSE	FALSE	FALSE	FALSE	FALSE	FALSE	FALSE	FALSE	FALSE	FALSE	FALSE	FALSE	FALSE	FALSE	FALSE	FALSE	FALSE	FALSE	FALSE	FALSE	FALSE	FALSE	FALSE	FALSE	FALSE	FALSE	FALSE	FALSE	FALSE	FALSE	FALSE	FALSE	FALSE	FALSE	ferrian-	FALSE	FALSE	FALSE	FALSE	FALSE	FALSE	FALSE	FALSE	FALSE	FALSE	FALSE
fluor-	FALSE	FALSE	FALSE	FALSE	FALSE	FALSE	FALSE	FALSE	FALSE	FALSE	FALSE	FALSE	FALSE	FALSE	FALSE	FALSE	FALSE	FALSE	FALSE	FALSE	FALSE	FALSE	FALSE	FALSE	FALSE	FALSE	FALSE	FALSE	FALSE	FALSE	FALSE	FALSE	FALSE	FALSE	FALSE	FALSE	FALSE	FALSE	FALSE	FALSE	FALSE	FALSE	FALSE	FALSE	FALSE	FALSE	FALSE	FALSE	FALSE
hydro-	FALSE	FALSE	FALSE	FALSE	FALSE	FALSE	FALSE	FALSE	FALSE	FALSE	FALSE	FALSE	FALSE	FALSE	FALSE	FALSE	FALSE	FALSE	FALSE	FALSE	FALSE	FALSE	FALSE	FALSE	FALSE	FALSE	FALSE	FALSE	FALSE	FALSE	FALSE	FALSE	FALSE	FALSE	FALSE	FALSE	FALSE	FALSE	FALSE	FALSE	FALSE	FALSE	FALSE	FALSE	FALSE	FALSE	FALSE	FALSE	FALSE
lithian-	FALSE	FALSE	FALSE	FALSE	FALSE	FALSE	FALSE	FALSE	FALSE	FALSE	FALSE	FALSE	FALSE	FALSE	FALSE	FALSE	FALSE	FALSE	FALSE	FALSE	FALSE	FALSE	FALSE	FALSE	FALSE	FALSE	FALSE	FALSE	FALSE	FALSE	FALSE	FALSE	FALSE	FALSE	FALSE	FALSE	FALSE	FALSE	FALSE	FALSE	FALSE	FALSE	FALSE	FALSE	FALSE	FALSE	FALSE	FALSE	FALSE
manganese-	FALSE	FALSE	FALSE	FALSE	FALSE	FALSE	FALSE	FALSE	FALSE	FALSE	FALSE	FALSE	FALSE	FALSE	FALSE	FALSE	FALSE	FALSE	FALSE	FALSE	FALSE	FALSE	FALSE	FALSE	FALSE	FALSE	FALSE	FALSE	FALSE	FALSE	FALSE	FALSE	FALSE	FALSE	FALSE	FALSE	FALSE	FALSE	FALSE	FALSE	FALSE	FALSE	FALSE	FALSE	FALSE	FALSE	FALSE	FALSE	FALSE
manganoan-	FALSE	FALSE	FALSE	FALSE	FALSE	FALSE	FALSE	FALSE	FALSE	FALSE	FALSE	FALSE	FALSE	FALSE	FALSE	FALSE	FALSE	FALSE	FALSE	FALSE	FALSE	FALSE	FALSE	FALSE	FALSE	FALSE	FALSE	FALSE	FALSE	FALSE	FALSE	FALSE	FALSE	FALSE	FALSE	FALSE	FALSE	FALSE	FALSE	FALSE	FALSE	FALSE	FALSE	FALSE	FALSE	FALSE	FALSE	FALSE	FALSE
plumbian-	FALSE	FALSE	FALSE	FALSE	FALSE	FALSE	FALSE	FALSE	FALSE	FALSE	FALSE	FALSE	FALSE	FALSE	FALSE	FALSE	FALSE	FALSE	FALSE	FALSE	FALSE	FALSE	FALSE	FALSE	FALSE	FALSE	FALSE	FALSE	FALSE	FALSE	FALSE	FALSE	FALSE	FALSE	FALSE	FALSE	FALSE	FALSE	FALSE	FALSE	FALSE	FALSE	FALSE	FALSE	FALSE	FALSE	FALSE	FALSE	FALSE
titanium-	FALSE	FALSE	FALSE	FALSE	FALSE	FALSE	FALSE	FALSE	FALSE	FALSE	FALSE	FALSE	FALSE	FALSE	FALSE	FALSE	FALSE	FALSE	FALSE	FALSE	FALSE	FALSE	FALSE	FALSE	FALSE	FALSE	FALSE	FALSE	FALSE	FALSE	FALSE	FALSE	FALSE	FALSE	FALSE	FALSE	FALSE	FALSE	FALSE	FALSE	FALSE	FALSE	FALSE	FALSE	FALSE	FALSE	FALSE	FALSE	FALSE
titanian-	FALSE	FALSE	FALSE	FALSE	FALSE	FALSE	FALSE	FALSE	FALSE	FALSE	FALSE	FALSE	FALSE	FALSE	FALSE	FALSE	FALSE	FALSE	FALSE	FALSE	FALSE	FALSE	FALSE	FALSE	FALSE	FALSE	FALSE	FALSE	FALSE	FALSE	FALSE	FALSE	FALSE	FALSE	FALSE	FALSE	FALSE	FALSE	FALSE	FALSE	FALSE	FALSE	FALSE	FALSE	FALSE	FALSE	FALSE	FALSE	FALSE
potassium-	FALSE	FALSE	FALSE	FALSE	FALSE	FALSE	FALSE	FALSE	FALSE	FALSE	FALSE	FALSE	FALSE	FALSE	FALSE	FALSE	FALSE	FALSE	FALSE	FALSE	FALSE	FALSE	FALSE	FALSE	FALSE	FALSE	FALSE	FALSE	FALSE	FALSE	FALSE	FALSE	FALSE	FALSE	FALSE	FALSE	FALSE	FALSE	FALSE	FALSE	FALSE	FALSE	FALSE	FALSE	FALSE	FALSE	FALSE	FALSE	FALSE
potassian-	FALSE	FALSE	FALSE	FALSE	FALSE	potassian-	potassian-	potassian-	FALSE	FALSE	FALSE	FALSE	FALSE	FALSE	potassian-	FALSE	potassian-	FALSE	FALSE	FALSE	FALSE	FALSE	FALSE	FALSE	FALSE	FALSE	FALSE	FALSE	FALSE	potassian-	FALSE	potassian-	FALSE	FALSE	FALSE	FALSE	FALSE	FALSE	FALSE	FALSE	FALSE	potassian-	potassian-	potassian-	FALSE	FALSE	FALSE	FALSE	FALSE
subsilicic-	FALSE	FALSE	FALSE	FALSE	FALSE	FALSE	FALSE	FALSE	FALSE	FALSE	FALSE	FALSE	FALSE	FALSE	FALSE	FALSE	FALSE	FALSE	FALSE	FALSE	FALSE	FALSE	FALSE	FALSE	FALSE	FALSE	FALSE	FALSE	FALSE	FALSE	FALSE	FALSE	FALSE	FALSE	FALSE	FALSE	FALSE	FALSE	FALSE	FALSE	FALSE	FALSE	FALSE	FALSE	FALSE	FALSE	FALSE	FALSE	FALSE
zinc-	FALSE	FALSE	FALSE	FALSE	FALSE	FALSE	FALSE	FALSE	FALSE	FALSE	FALSE	FALSE	FALSE	FALSE	FALSE	FALSE	FALSE	FALSE	FALSE	FALSE	FALSE	FALSE	FALSE	FALSE	FALSE	FALSE	FALSE	FALSE	FALSE	FALSE	FALSE	FALSE	FALSE	FALSE	FALSE	FALSE	FALSE	FALSE	FALSE	FALSE	FALSE	FALSE	FALSE	FALSE	FALSE	FALSE	FALSE	FALSE	FALSE
zincian-	FALSE	FALSE	FALSE	FALSE	FALSE	FALSE	FALSE	FALSE	FALSE	FALSE	FALSE	FALSE	FALSE	FALSE	FALSE	FALSE	FALSE	FALSE	FALSE	FALSE	FALSE	FALSE	FALSE	FALSE	FALSE	FALSE	FALSE	FALSE	FALSE	FALSE	FALSE	FALSE	FALSE	FALSE	FALSE	FALSE	FALSE	FALSE	FALSE	FALSE	FALSE	FALSE	FALSE	FALSE	FALSE	FALSE	FALSE	FALSE	FALSE
nickeloan-	FALSE	FALSE	FALSE	FALSE	FALSE	FALSE	FALSE	FALSE	FALSE	FALSE	FALSE	FALSE	FALSE	FALSE	FALSE	FALSE	FALSE	FALSE	FALSE	FALSE	FALSE	FALSE	FALSE	FALSE	FALSE	FALSE	FALSE	FALSE	FALSE	FALSE	FALSE	FALSE	FALSE	FALSE	FALSE	FALSE	FALSE	FALSE	FALSE	FALSE	FALSE	FALSE	FALSE	FALSE	FALSE	FALSE	FALSE	FALSE	FALSE
barian-	FALSE	FALSE	FALSE	FALSE	FALSE	FALSE	FALSE	FALSE	FALSE	FALSE	FALSE	FALSE	FALSE	FALSE	FALSE	FALSE	FALSE	FALSE	FALSE	FALSE	FALSE	FALSE	FALSE	FALSE	FALSE	FALSE	FALSE	FALSE	FALSE	FALSE	FALSE	FALSE	FALSE	FALSE	FALSE	FALSE	FALSE	FALSE	FALSE	FALSE	FALSE	FALSE	FALSE	FALSE	FALSE	FALSE	FALSE	FALSE	FALSE
strontian-	FALSE	FALSE	FALSE	FALSE	FALSE	FALSE	FALSE	FALSE	FALSE	FALSE	FALSE	FALSE	FALSE	FALSE	FALSE	FALSE	FALSE	FALSE	FALSE	FALSE	FALSE	FALSE	FALSE	FALSE	FALSE	FALSE	FALSE	FALSE	FALSE	FALSE	FALSE	FALSE	FALSE	FALSE	FALSE	FALSE	FALSE	FALSE	FALSE	FALSE	FALSE	FALSE	FALSE	FALSE	FALSE	FALSE	FALSE	FALSE	FALSE
alumino-	FALSE	FALSE	FALSE	FALSE	FALSE	FALSE	FALSE	FALSE	FALSE	FALSE	FALSE	FALSE	FALSE	FALSE	FALSE	FALSE	FALSE	FALSE	FALSE	FALSE	FALSE	FALSE	FALSE	FALSE	FALSE	FALSE	FALSE	FALSE	FALSE	FALSE	FALSE	FALSE	FALSE	FALSE	FALSE	FALSE	FALSE	FALSE	FALSE	FALSE	FALSE	FALSE	FALSE	FALSE	FALSE	FALSE	FALSE	FALSE	FALSE
alumino-	FALSE	FALSE	FALSE	FALSE	FALSE	FALSE	FALSE	FALSE	FALSE	FALSE	FALSE	FALSE	FALSE	FALSE	FALSE	FALSE	FALSE	FALSE	FALSE	FALSE	FALSE	FALSE	FALSE	FALSE	FALSE	FALSE	FALSE	FALSE	FALSE	FALSE	FALSE	FALSE	FALSE	FALSE	FALSE	FALSE	FALSE	FALSE	FALSE	FALSE	FALSE	FALSE	FALSE	FALSE	FALSE	FALSE	FALSE	FALSE	FALSE
alumino-	FALSE	FALSE	FALSE	FALSE	FALSE	FALSE	FALSE	FALSE	FALSE	FALSE	FALSE	FALSE	FALSE	FALSE	FALSE	FALSE	FALSE	FALSE	FALSE	FALSE	FALSE	FALSE	FALSE	FALSE	FALSE	FALSE	FALSE	FALSE	FALSE	FALSE	FALSE	FALSE	FALSE	FALSE	FALSE	FALSE	FALSE	FALSE	FALSE	FALSE	FALSE	FALSE	FALSE	FALSE	FALSE	FALSE	FALSE	FALSE	FALSE
sodium	FALSE	FALSE	FALSE	FALSE	FALSE	FALSE	FALSE	FALSE	FALSE	FALSE	FALSE	FALSE	FALSE	FALSE	FALSE	FALSE	FALSE	FALSE	FALSE	FALSE	FALSE	FALSE	FALSE	FALSE	FALSE	FALSE	FALSE	FALSE	FALSE	FALSE	FALSE	FALSE	FALSE	FALSE	FALSE	FALSE	FALSE	FALSE	FALSE	FALSE	FALSE	FALSE	FALSE	FALSE	FALSE	FALSE	FALSE	FALSE	FALSE
sodium	FALSE	FALSE	FALSE	FALSE	FALSE	FALSE	FALSE	FALSE	FALSE	FALSE	FALSE	FALSE	FALSE	FALSE	FALSE	FALSE	FALSE	FALSE	FALSE	FALSE	FALSE	FALSE	FALSE	FALSE	FALSE	FALSE	FALSE	FALSE	FALSE	FALSE	FALSE	FALSE	FALSE	FALSE	FALSE	FALSE	FALSE	FALSE	FALSE	FALSE	FALSE	FALSE	FALSE	FALSE	FALSE	FALSE	FALSE	FALSE	FALSE
sodian-	FALSE	FALSE	FALSE	FALSE	FALSE	FALSE	FALSE	FALSE	FALSE	FALSE	FALSE	FALSE	FALSE	FALSE	FALSE	FALSE	FALSE	FALSE	FALSE	FALSE	FALSE	FALSE	FALSE	FALSE	FALSE	FALSE	FALSE	FALSE	FALSE	FALSE	FALSE	FALSE	FALSE	FALSE	FALSE	FALSE	FALSE	FALSE	FALSE	FALSE	FALSE	FALSE	FALSE	FALSE	FALSE	FALSE	FALSE	FALSE	FALSE
sodian-	FALSE	FALSE	FALSE	FALSE	FALSE	FALSE	FALSE	FALSE	FALSE	FALSE	FALSE	FALSE	FALSE	FALSE	FALSE	FALSE	FALSE	FALSE	FALSE	FALSE	FALSE	FALSE	FALSE	FALSE	FALSE	FALSE	FALSE	FALSE	FALSE	FALSE	FALSE	FALSE	FALSE	FALSE	FALSE	FALSE	FALSE	FALSE	FALSE	FALSE	FALSE	FALSE	FALSE	FALSE	FALSE	FALSE	FALSE	FALSE	FALSE
subcalcic	FALSE	FALSE	FALSE	FALSE	FALSE	FALSE	FALSE	FALSE	FALSE	FALSE	FALSE	FALSE	FALSE	FALSE	FALSE	FALSE	FALSE	FALSE	FALSE	FALSE	FALSE	FALSE	FALSE	FALSE	FALSE	FALSE	FALSE	FALSE	FALSE	FALSE	FALSE	FALSE	FALSE	FALSE	FALSE	FALSE	FALSE	FALSE	FALSE	FALSE	FALSE	FALSE	FALSE	FALSE	FALSE	FALSE	FALSE	FALSE	FALSE
calcian-	FALSE	FALSE	FALSE	FALSE	FALSE	FALSE	FALSE	FALSE	FALSE	FALSE	FALSE	FALSE	FALSE	FALSE	FALSE	FALSE	FALSE	FALSE	FALSE	FALSE	FALSE	FALSE	FALSE	FALSE	FALSE	FALSE	FALSE	FALSE	FALSE	FALSE	FALSE	FALSE	FALSE	FALSE	FALSE	FALSE	FALSE	FALSE	FALSE	FALSE	FALSE	FALSE	FALSE	FALSE	FALSE	FALSE	FALSE	FALSE	FALSE
calcian-	FALSE	FALSE	FALSE	FALSE	FALSE	FALSE	FALSE	FALSE	FALSE	FALSE	FALSE	FALSE	FALSE	FALSE	FALSE	FALSE	FALSE	FALSE	FALSE	FALSE	FALSE	FALSE	FALSE	FALSE	FALSE	FALSE	FALSE	FALSE	FALSE	FALSE	FALSE	FALSE	FALSE	FALSE	FALSE	FALSE	FALSE	FALSE	FALSE	FALSE	FALSE	FALSE	FALSE	FALSE	FALSE	FALSE	FALSE	FALSE	FALSE
silica-poor	FALSE	FALSE	FALSE	FALSE	FALSE	FALSE	FALSE	FALSE	FALSE	FALSE	FALSE	FALSE	FALSE	FALSE	FALSE	FALSE	FALSE	FALSE	FALSE	FALSE	FALSE	FALSE	FALSE	FALSE	FALSE	FALSE	FALSE	FALSE	FALSE	FALSE	FALSE	FALSE	FALSE	FALSE	FALSE	FALSE	FALSE	FALSE	FALSE	FALSE	FALSE	FALSE	FALSE	FALSE	FALSE	FALSE	FALSE	FALSE	FALSE
Part 16. Select TRUE prefixes and tidy	FALSEFALSEFALSEFALSEFALSEFALSEFALSEFALSEFALSEFALSEFALSEFALSEFALSEFALSEFALSEFALSEFALSEFALSEFALSEFALSE	FALSEFALSEFALSEFALSEFALSEFALSEFALSEFALSEFALSEFALSEFALSEFALSEFALSEFALSEFALSEFALSEFALSEFALSEFALSEFALSE	FALSEFALSEFALSEFALSEFALSEFALSEFALSEFALSEFALSEFALSEFALSEFALSEFALSEFALSEFALSEFALSEFALSEFALSEFALSEFALSE	FALSEFALSEFALSEFALSEFALSEFALSEFALSEFALSEFALSEFALSEFALSEFALSEFALSEFALSEFALSEFALSEFALSEFALSEFALSEFALSE	FALSEFALSEFALSEFALSEFALSEFALSEFALSEFALSEFALSEFALSEFALSEFALSEFALSEFALSEFALSEFALSEFALSEFALSEFALSEFALSE	FALSEFALSEFALSEFALSEFALSEFALSEFALSEFALSEFALSEFALSEFALSEFALSEFALSEFALSEFALSEFALSEpotassian-FALSEFALSEFALSE	FALSEFALSEFALSEFALSEFALSEFALSEFALSEFALSEFALSEFALSEFALSEFALSEFALSEFALSEFALSEFALSEpotassian-FALSEFALSEFALSE	FALSEFALSEFALSEFALSEFALSEFALSEFALSEFALSEFALSEFALSEFALSEFALSEFALSEFALSEFALSEFALSEpotassian-FALSEFALSEFALSE	FALSEFALSEFALSEFALSEFALSEFALSEFALSEFALSEFALSEFALSEFALSEFALSEFALSEFALSEFALSEFALSEFALSEFALSEFALSEFALSE	FALSEFALSEFALSEFALSEFALSEFALSEFALSEFALSEFALSEFALSEFALSEFALSEFALSEFALSEFALSEFALSEFALSEFALSEFALSEFALSE	FALSEFALSEFALSEFALSEFALSEFALSEFALSEFALSEFALSEFALSEFALSEFALSEFALSEFALSEFALSEFALSEFALSEFALSEFALSEFALSE	FALSEFALSEFALSEFALSEFALSEFALSEFALSEFALSEFALSEFALSEFALSEFALSEFALSEFALSEFALSEFALSEFALSEFALSEFALSEFALSE	FALSEFALSEFALSEFALSEFALSEFALSEFALSEFALSEFALSEFALSEFALSEFALSEFALSEFALSEFALSEFALSEFALSEFALSEFALSEFALSE	FALSEFALSEFALSEFALSEFALSEFALSEFALSEFALSEFALSEFALSEFALSEFALSEFALSEFALSEFALSEFALSEFALSEFALSEFALSEFALSE	FALSEFALSEFALSEFALSEFALSEFALSEFALSEFALSEFALSEFALSEFALSEFALSEFALSEFALSEFALSEFALSEpotassian-FALSEFALSEFALSE	FALSEFALSEFALSEFALSEFALSEFALSEFALSEFALSEFALSEFALSEFALSEFALSEFALSEFALSEFALSEFALSEFALSEFALSEFALSEFALSE	FALSEFALSEFALSEFALSEFALSEFALSEFALSEFALSEFALSEFALSEFALSEFALSEFALSEFALSEFALSEFALSEpotassian-FALSEFALSEFALSE	FALSEFALSEFALSEFALSEFALSEFALSEFALSEFALSEFALSEFALSEFALSEFALSEFALSEFALSEFALSEFALSEFALSEFALSEFALSEFALSE	FALSEFALSEFALSEFALSEFALSEFALSEFALSEFALSEFALSEFALSEFALSEFALSEFALSEFALSEFALSEFALSEFALSEFALSEFALSEFALSE	FALSEFALSEFALSEFALSEFALSEFALSEFALSEFALSEFALSEFALSEFALSEFALSEFALSEFALSEFALSEFALSEFALSEFALSEFALSEFALSE	FALSEFALSEFALSEFALSEFALSEFALSEFALSEFALSEFALSEFALSEFALSEFALSEFALSEFALSEFALSEFALSEFALSEFALSEFALSEFALSE	FALSEFALSEFALSEFALSEFALSEFALSEFALSEFALSEFALSEFALSEFALSEFALSEFALSEFALSEFALSEFALSEFALSEFALSEFALSEFALSE	FALSEFALSEFALSEFALSEFALSEFALSEFALSEFALSEFALSEFALSEFALSEFALSEFALSEFALSEFALSEFALSEFALSEFALSEFALSEFALSE	FALSEFALSEFALSEFALSEFALSEFALSEFALSEFALSEFALSEFALSEFALSEFALSEFALSEFALSEFALSEFALSEFALSEFALSEFALSEFALSE	FALSEFALSEFALSEFALSEFALSEFALSEFALSEFALSEFALSEFALSEFALSEFALSEFALSEFALSEFALSEFALSEFALSEFALSEFALSEFALSE	FALSEFALSEFALSEFALSEFALSEFALSEFALSEFALSEFALSEFALSEFALSEFALSEFALSEFALSEFALSEFALSEFALSEFALSEFALSEFALSE	FALSEFALSEFALSEFALSEFALSEFALSEFALSEFALSEFALSEFALSEFALSEFALSEFALSEFALSEFALSEFALSEFALSEFALSEFALSEFALSE	FALSEFALSEFALSEFALSEFALSEFALSEFALSEFALSEFALSEFALSEFALSEFALSEFALSEFALSEFALSEFALSEFALSEFALSEFALSEFALSE	FALSEFALSEFALSEFALSEFALSEFALSEFALSEFALSEFALSEFALSEFALSEFALSEFALSEFALSEFALSEFALSEFALSEFALSEFALSEFALSE	FALSEFALSEFALSEFALSEFALSEFALSEFALSEFALSEFALSEFALSEFALSEFALSEFALSEFALSEFALSEFALSEpotassian-FALSEFALSEFALSE	FALSEFALSEFALSEFALSEFALSEFALSEFALSEFALSEFALSEFALSEFALSEFALSEFALSEFALSEFALSEFALSEFALSEFALSEFALSEFALSE	FALSEFALSEFALSEFALSEFALSEFALSEFALSEFALSEFALSEFALSEFALSEFALSEFALSEFALSEFALSEFALSEpotassian-FALSEFALSEFALSE	FALSEFALSEFALSEFALSEFALSEFALSEFALSEFALSEFALSEFALSEFALSEFALSEFALSEFALSEFALSEFALSEFALSEFALSEFALSEFALSE	FALSEFALSEFALSEFALSEFALSEFALSEFALSEFALSEFALSEFALSEFALSEFALSEFALSEFALSEFALSEFALSEFALSEFALSEFALSEFALSE	FALSEFALSEFALSEFALSEFALSEFALSEFALSEFALSEFALSEFALSEFALSEFALSEFALSEFALSEFALSEFALSEFALSEFALSEFALSEFALSE	FALSEFALSEFALSEFALSEFALSEFALSEFALSEFALSEFALSEFALSEFALSEFALSEFALSEFALSEFALSEFALSEFALSEFALSEFALSEFALSE	FALSEFALSEFALSEFALSEFALSEFALSEFALSEFALSEFALSEFALSEFALSEFALSEFALSEFALSEFALSEFALSEFALSEFALSEFALSEFALSE	FALSEFALSEFALSEFALSEFALSEFALSEferrian-FALSEFALSEFALSEFALSEFALSEFALSEFALSEFALSEFALSEFALSEFALSEFALSEFALSE	FALSEFALSEFALSEFALSEFALSEFALSEFALSEFALSEFALSEFALSEFALSEFALSEFALSEFALSEFALSEFALSEFALSEFALSEFALSEFALSE	FALSEFALSEFALSEFALSEFALSEFALSEFALSEFALSEFALSEFALSEFALSEFALSEFALSEFALSEFALSEFALSEFALSEFALSEFALSEFALSE	FALSEFALSEFALSEFALSEFALSEFALSEFALSEFALSEFALSEFALSEFALSEFALSEFALSEFALSEFALSEFALSEFALSEFALSEFALSEFALSE	FALSEFALSEFALSEFALSEFALSEFALSEFALSEFALSEFALSEFALSEFALSEFALSEFALSEFALSEFALSEFALSEpotassian-FALSEFALSEFALSE	FALSEFALSEFALSEFALSEFALSEFALSEFALSEFALSEFALSEFALSEFALSEFALSEFALSEFALSEFALSEFALSEpotassian-FALSEFALSEFALSE	FALSEFALSEFALSEFALSEFALSEFALSEFALSEFALSEFALSEFALSEFALSEFALSEFALSEFALSEFALSEFALSEpotassian-FALSEFALSEFALSE	FALSEFALSEFALSEFALSEFALSEFALSEFALSEFALSEFALSEFALSEFALSEFALSEFALSEFALSEFALSEFALSEFALSEFALSEFALSEFALSE	FALSEFALSEFALSEFALSEFALSEFALSEFALSEFALSEFALSEFALSEFALSEFALSEFALSEFALSEFALSEFALSEFALSEFALSEFALSEFALSE	FALSEFALSEFALSEFALSEFALSEFALSEFALSEFALSEFALSEFALSEFALSEFALSEFALSEFALSEFALSEFALSEFALSEFALSEFALSEFALSE	FALSEFALSEFALSEFALSEFALSEFALSEFALSEFALSEFALSEFALSEFALSEFALSEFALSEFALSEFALSEFALSEFALSEFALSEFALSEFALSE	FALSEFALSEFALSEFALSEFALSEFALSEFALSEFALSEFALSEFALSEFALSEFALSEFALSEFALSEFALSEFALSEFALSEFALSEFALSEFALSE
Final adjectival modifier						potassian-	potassian-	potassian-							potassian-		potassian-													potassian-		potassian-						ferrian-				potassian-	potassian-	potassian-
	FALSEFALSEFALSEFALSEFALSEFALSEFALSEFALSEFALSE	FALSEFALSEFALSEFALSEFALSEFALSEFALSEFALSEFALSE	FALSEFALSEFALSEFALSEFALSEFALSEFALSEFALSEFALSE	FALSEFALSEFALSEFALSEFALSEFALSEFALSEFALSEFALSE	FALSEFALSEFALSEFALSEFALSEFALSEFALSEFALSEFALSE	FALSEFALSEFALSEFALSEFALSEFALSEFALSEFALSEFALSE	FALSEFALSEFALSEFALSEFALSEFALSEFALSEFALSEFALSE	FALSEFALSEFALSEFALSEFALSEFALSEFALSEFALSEFALSE	FALSEFALSEFALSEFALSEFALSEFALSEFALSEFALSEFALSE	FALSEFALSEFALSEFALSEFALSEFALSEFALSEFALSEFALSE	FALSEFALSEFALSEFALSEFALSEFALSEFALSEFALSEFALSE	FALSEFALSEFALSEFALSEFALSEFALSEFALSEFALSEFALSE	FALSEFALSEFALSEFALSEFALSEFALSEFALSEFALSEFALSE	FALSEFALSEFALSEFALSEFALSEFALSEFALSEFALSEFALSE	FALSEFALSEFALSEFALSEFALSEFALSEFALSEFALSEFALSE	FALSEFALSEFALSEFALSEFALSEFALSEFALSEFALSEFALSE	FALSEFALSEFALSEFALSEFALSEFALSEFALSEFALSEFALSE	FALSEFALSEFALSEFALSEFALSEFALSEFALSEFALSEFALSE	FALSEFALSEFALSEFALSEFALSEFALSEFALSEFALSEFALSE	FALSEFALSEFALSEFALSEFALSEFALSEFALSEFALSEFALSE	FALSEFALSEFALSEFALSEFALSEFALSEFALSEFALSEFALSE	FALSEFALSEFALSEFALSEFALSEFALSEFALSEFALSEFALSE	FALSEFALSEFALSEFALSEFALSEFALSEFALSEFALSEFALSE	FALSEFALSEFALSEFALSEFALSEFALSEFALSEFALSEFALSE	FALSEFALSEFALSEFALSEFALSEFALSEFALSEFALSEFALSE	FALSEFALSEFALSEFALSEFALSEFALSEFALSEFALSEFALSE	FALSEFALSEFALSEFALSEFALSEFALSEFALSEFALSEFALSE	FALSEFALSEFALSEFALSEFALSEFALSEFALSEFALSEFALSE	FALSEFALSEFALSEFALSEFALSEFALSEFALSEFALSEFALSE	FALSEFALSEFALSEFALSEFALSEFALSEFALSEFALSEFALSE	FALSEFALSEFALSEFALSEFALSEFALSEFALSEFALSEFALSE	FALSEFALSEFALSEFALSEFALSEFALSEFALSEFALSEFALSE	FALSEFALSEFALSEFALSEFALSEFALSEFALSEFALSEFALSE	FALSEFALSEFALSEFALSEFALSEFALSEFALSEFALSEFALSE	FALSEFALSEFALSEFALSEFALSEFALSEFALSEFALSEFALSE	FALSEFALSEFALSEFALSEFALSEFALSEFALSEFALSEFALSE	FALSEFALSEFALSEFALSEFALSEFALSEFALSEFALSEFALSE	FALSEFALSEFALSEFALSEFALSEFALSEFALSEFALSEFALSE	FALSEFALSEFALSEFALSEFALSEFALSEFALSEFALSEFALSE	FALSEFALSEFALSEFALSEFALSEFALSEFALSEFALSEFALSE	FALSEFALSEFALSEFALSEFALSEFALSEFALSEFALSEFALSE	FALSEFALSEFALSEFALSEFALSEFALSEFALSEFALSEFALSE	FALSEFALSEFALSEFALSEFALSEFALSEFALSEFALSEFALSE	FALSEFALSEFALSEFALSEFALSEFALSEFALSEFALSEFALSE	FALSEFALSEFALSEFALSEFALSEFALSEFALSEFALSEFALSE	FALSEFALSEFALSEFALSEFALSEFALSEFALSEFALSEFALSE	FALSEFALSEFALSEFALSEFALSEFALSEFALSEFALSEFALSE	FALSEFALSEFALSEFALSEFALSEFALSEFALSEFALSEFALSE	FALSEFALSEFALSEFALSEFALSEFALSEFALSEFALSEFALSE
Final prefix
Fe-Mg-Mn monoclinic prefix
Get rid of empty cells 1
Get rid of empty cells 2						potassian-	potassian-	potassian-							potassian-		potassian-													potassian-		potassian-						ferrian-				potassian-	potassian-	potassian-
Get rid of empty monoclinic cells 1
Get rid of empty monoclinic cells 2						potassian-	potassian-	potassian-							potassian-		potassian-													potassian-		potassian-						ferrian-				potassian-	potassian-	potassian-
Part 17. Non IMA scheme amphs.
Sum of oxides	98.3249	97.9346	97.6186	98.1594	98.7413	97.5813	98.0649	97.5071	97.4737	98.2186	98.2816	97.904	99.1188	98.6799	96.2585	98.5156	99.6293	96.8832	98.1133	98.3501	99.0715	97.1218	98.696	97.6503	97.7643	98.4461	98.4974	98.3371	98.1078	98.7179	97.5169	96.8238	97.467	94.9177	98.1517	96.9187	98.2768	98.6055	98.3245	99.533	98.238	98.8021	98.4099	98.7299	97.1056	97.4465	96.1638	98.0603	98.4127
? holmquistite	FALSE	FALSE	FALSE	FALSE	FALSE	FALSE	FALSE	FALSE	FALSE	FALSE	FALSE	FALSE	FALSE	FALSE	FALSE	FALSE	FALSE	FALSE	FALSE	FALSE	FALSE	FALSE	FALSE	FALSE	FALSE	FALSE	FALSE	FALSE	FALSE	FALSE	FALSE	FALSE	FALSE	FALSE	FALSE	FALSE	FALSE	FALSE	FALSE	FALSE	FALSE	FALSE	FALSE	FALSE	FALSE	FALSE	FALSE	FALSE	FALSE
? joesmithite	FALSE	FALSE	FALSE	FALSE	FALSE	FALSE	FALSE	FALSE	FALSE	FALSE	FALSE	FALSE	FALSE	FALSE	FALSE	FALSE	FALSE	FALSE	FALSE	FALSE	FALSE	FALSE	FALSE	FALSE	FALSE	FALSE	FALSE	FALSE	FALSE	FALSE	FALSE	FALSE	FALSE	FALSE	FALSE	FALSE	FALSE	FALSE	FALSE	FALSE	FALSE	FALSE	FALSE	FALSE	FALSE	FALSE	FALSE	FALSE	FALSE
? leakeite	FALSE	FALSE	FALSE	FALSE	FALSE	FALSE	FALSE	FALSE	FALSE	FALSE	FALSE	FALSE	FALSE	FALSE	FALSE	FALSE	FALSE	FALSE	FALSE	FALSE	FALSE	FALSE	FALSE	FALSE	FALSE	FALSE	FALSE	FALSE	FALSE	FALSE	FALSE	FALSE	FALSE	FALSE	FALSE	FALSE	FALSE	FALSE	FALSE	FALSE	FALSE	FALSE	FALSE	FALSE	FALSE	FALSE	FALSE	FALSE	FALSE
? kornite	FALSE	FALSE	FALSE	FALSE	FALSE	FALSE	FALSE	FALSE	FALSE	FALSE	FALSE	FALSE	FALSE	FALSE	FALSE	FALSE	FALSE	FALSE	FALSE	FALSE	FALSE	FALSE	FALSE	FALSE	FALSE	FALSE	FALSE	FALSE	FALSE	FALSE	FALSE	FALSE	FALSE	FALSE	FALSE	FALSE	FALSE	FALSE	FALSE	FALSE	FALSE	FALSE	FALSE	FALSE	FALSE	FALSE	FALSE	FALSE	FALSE
	FALSEFALSEFALSEFALSE	FALSEFALSEFALSEFALSE	FALSEFALSEFALSEFALSE	FALSEFALSEFALSEFALSE	FALSEFALSEFALSEFALSE	FALSEFALSEFALSEFALSE	FALSEFALSEFALSEFALSE	FALSEFALSEFALSEFALSE	FALSEFALSEFALSEFALSE	FALSEFALSEFALSEFALSE	FALSEFALSEFALSEFALSE	FALSEFALSEFALSEFALSE	FALSEFALSEFALSEFALSE	FALSEFALSEFALSEFALSE	FALSEFALSEFALSEFALSE	FALSEFALSEFALSEFALSE	FALSEFALSEFALSEFALSE	FALSEFALSEFALSEFALSE	FALSEFALSEFALSEFALSE	FALSEFALSEFALSEFALSE	FALSEFALSEFALSEFALSE	FALSEFALSEFALSEFALSE	FALSEFALSEFALSEFALSE	FALSEFALSEFALSEFALSE	FALSEFALSEFALSEFALSE	FALSEFALSEFALSEFALSE	FALSEFALSEFALSEFALSE	FALSEFALSEFALSEFALSE	FALSEFALSEFALSEFALSE	FALSEFALSEFALSEFALSE	FALSEFALSEFALSEFALSE	FALSEFALSEFALSEFALSE	FALSEFALSEFALSEFALSE	FALSEFALSEFALSEFALSE	FALSEFALSEFALSEFALSE	FALSEFALSEFALSEFALSE	FALSEFALSEFALSEFALSE	FALSEFALSEFALSEFALSE	FALSEFALSEFALSEFALSE	FALSEFALSEFALSEFALSE	FALSEFALSEFALSEFALSE	FALSEFALSEFALSEFALSE	FALSEFALSEFALSEFALSE	FALSEFALSEFALSEFALSE	FALSEFALSEFALSEFALSE	FALSEFALSEFALSEFALSE	FALSEFALSEFALSEFALSE	FALSEFALSEFALSEFALSE	FALSEFALSEFALSEFALSE
Alternative name
Hidden calculations	•	•	•	•	•	•	•	•	•	•	•	•	•	•	•	•	•	•	•	•	•	•	•	•	•	•	•	•	•	•	•	•	•	•	•	•	•	•	•	•	•	•	•	•	•	•	•	•	•
[truncated: 31 more columns]
